# Supplementary material for: Oxidative dearomatization/intramolecular Diels–Alder cycloaddition cascade for the syntheses of (±)-atisine and (±)-isoazitine
Source: Royal Society of Chemistry journal article supplement (doi:10.1039/c1ob06704d), 2011-11-17

## Electronic supplementary information

### Oxidative dearomatization/intramolecular Diels-Alder cycloaddition cascade

#### for the syntheses of (±)-atisine and (±)-isoazatine

Xiao-Yu Liu, Hang Cheng, Xiao-Huan Li, Qiao-Hong Chen,\*

Liang Xu and Feng-Peng Wang\*

Department of Chemistry of Medicinal Natural Products, West China College of Pharmacy, Sichuan University,  
Chengdu 610041, P. R. China

*E-mail:* qiaohongchen@yahoo.com.cn (Q.-H.C.); wfp@scu.edu.cn (F.-P.W.)

*Fax/Tel:* +86 28 85501368

### Table of Contents

|                   |             |
|-------------------|-------------|
| NMR Spectra ..... | Page S2~S42 |
|-------------------|-------------|

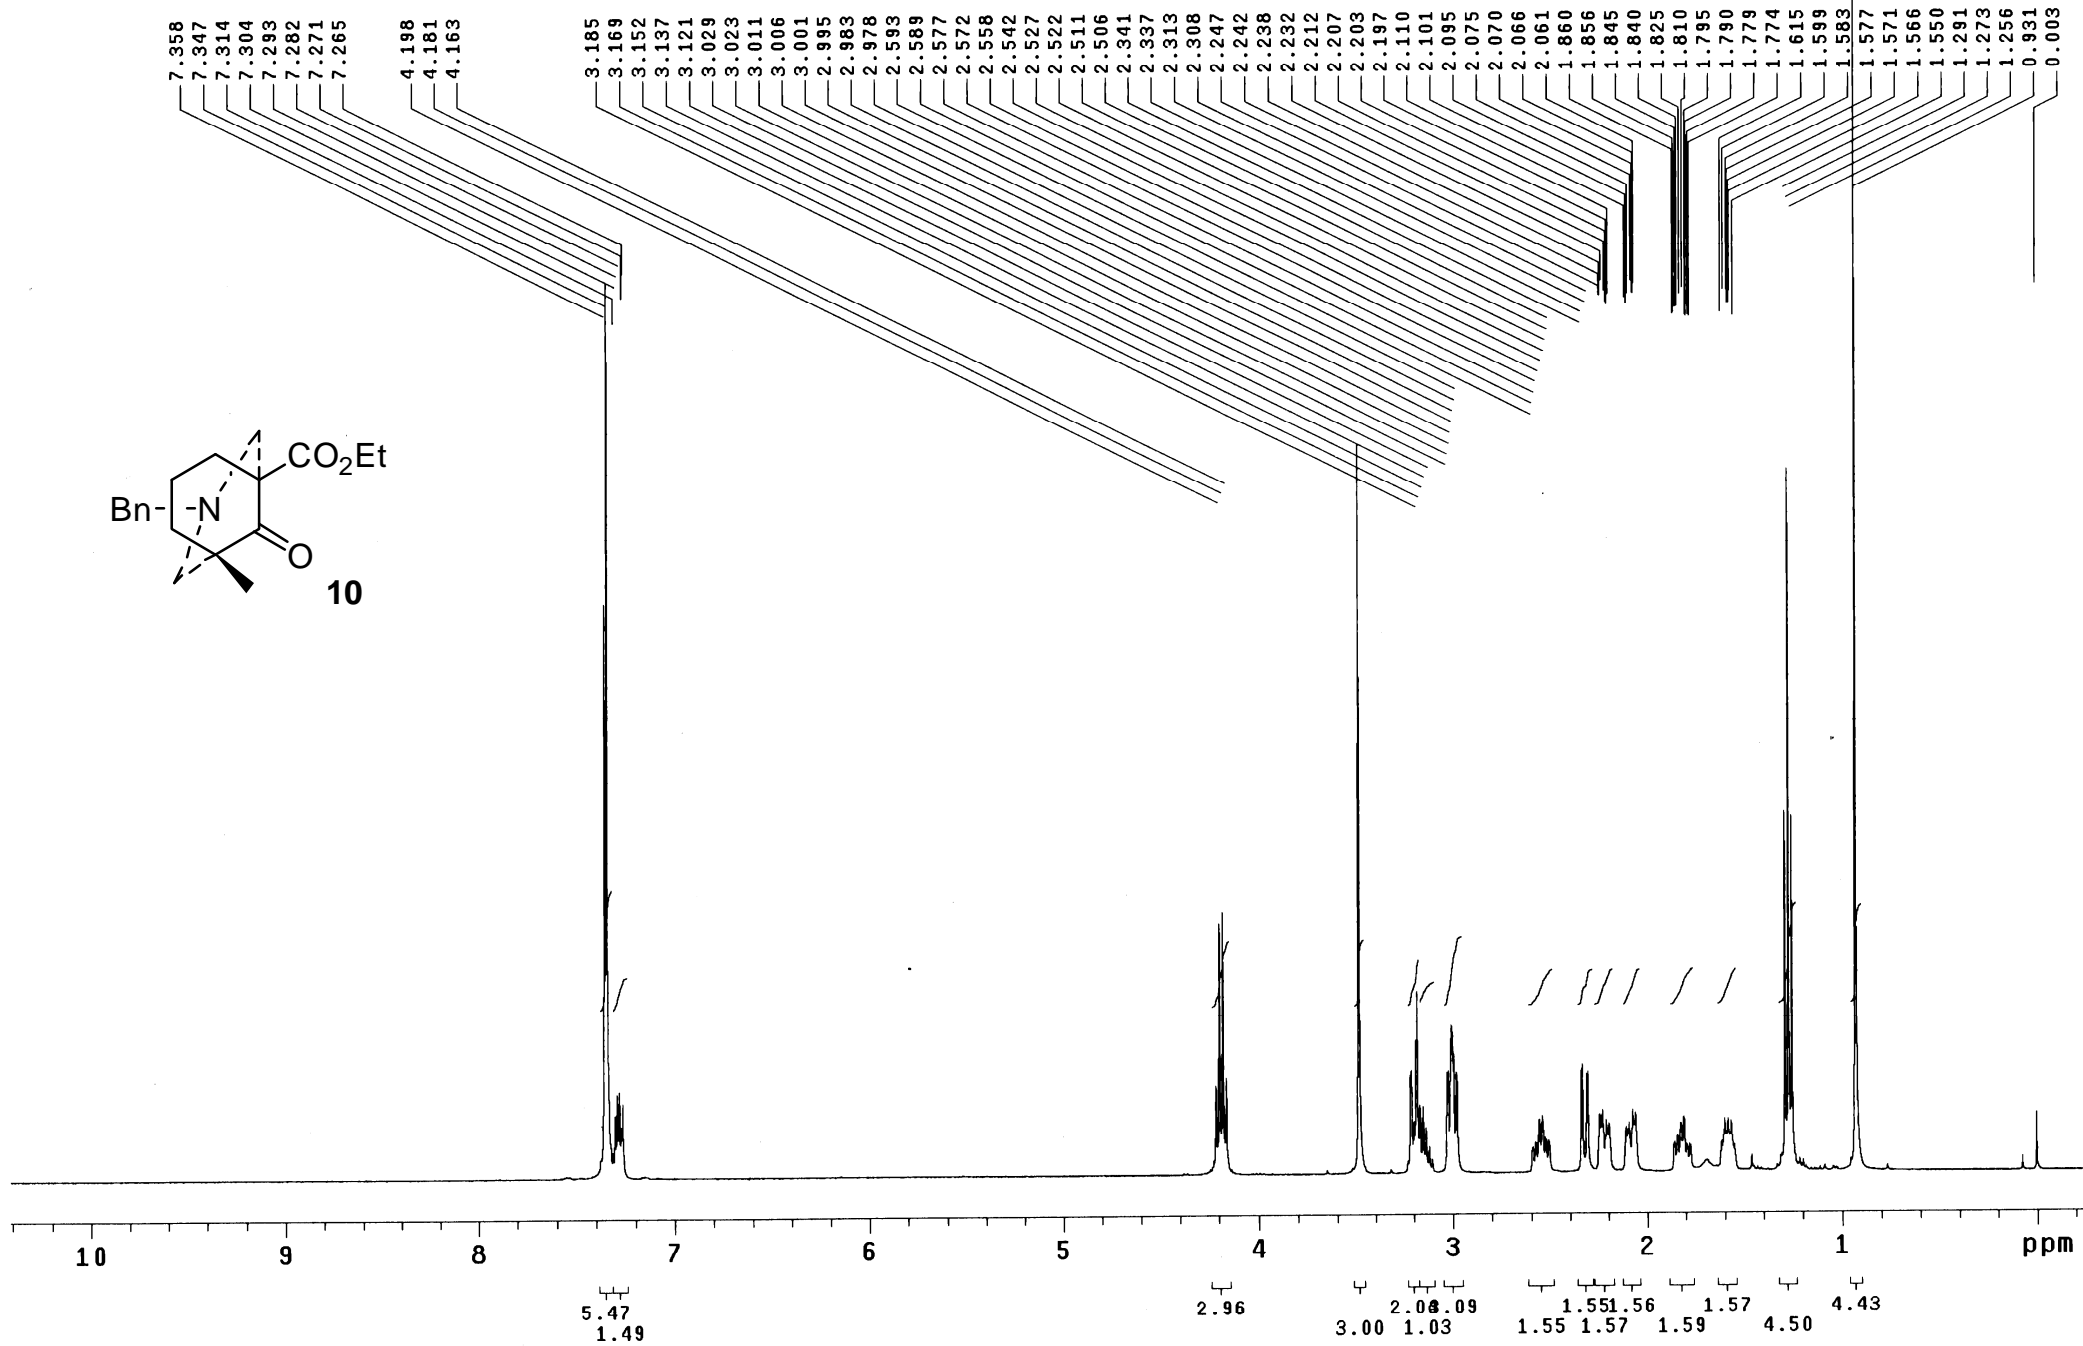

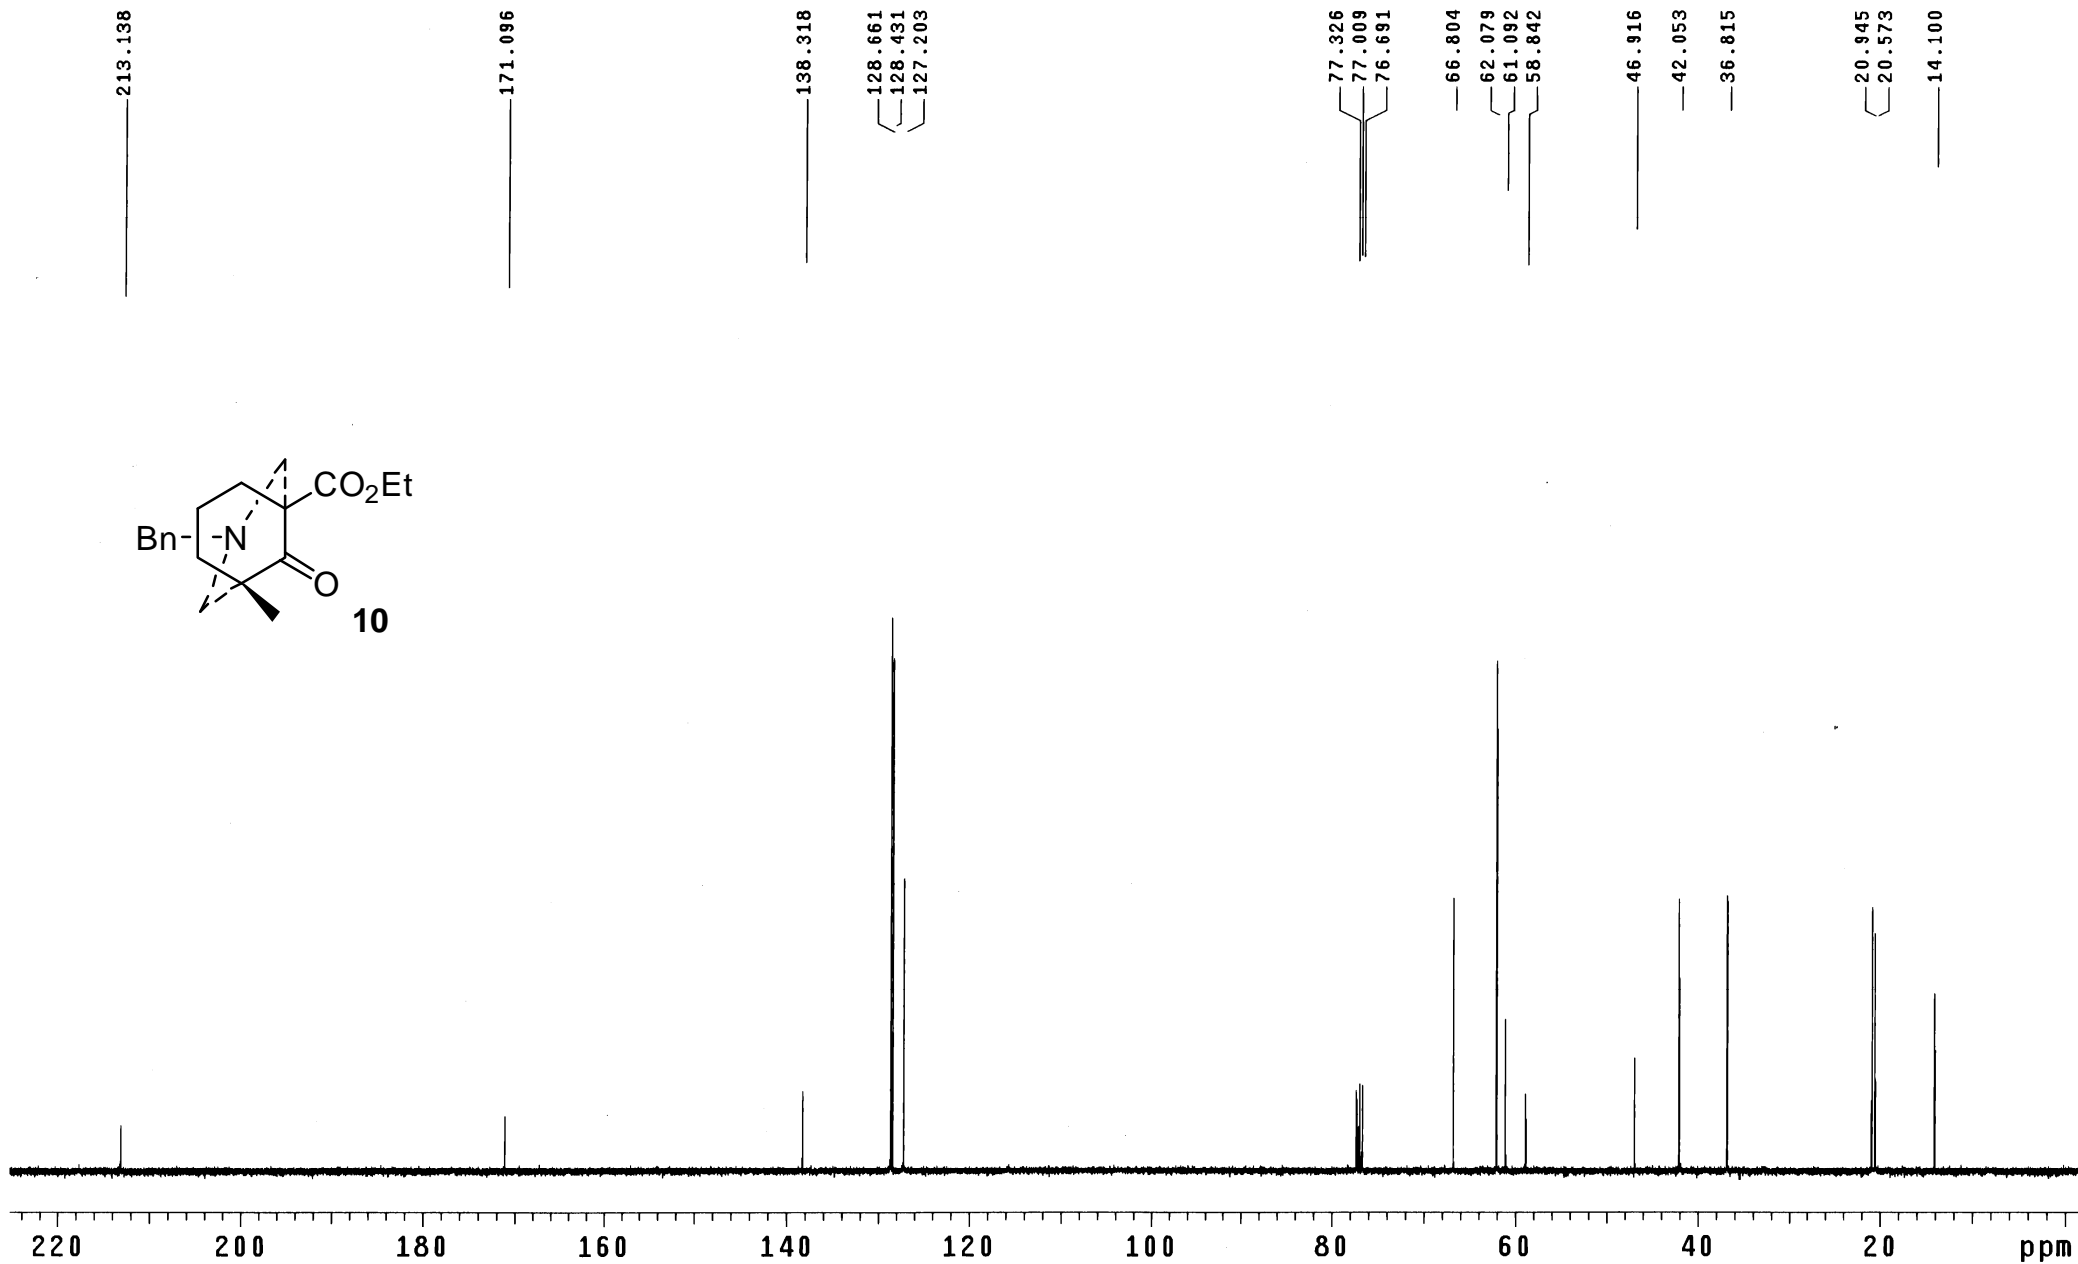

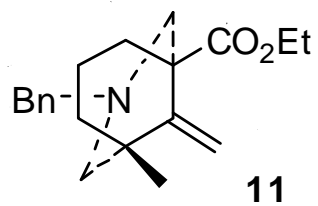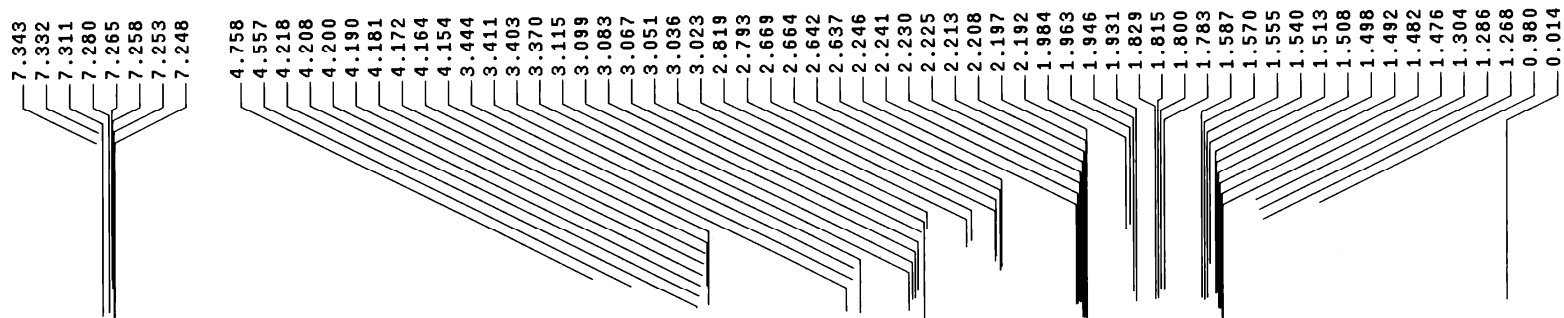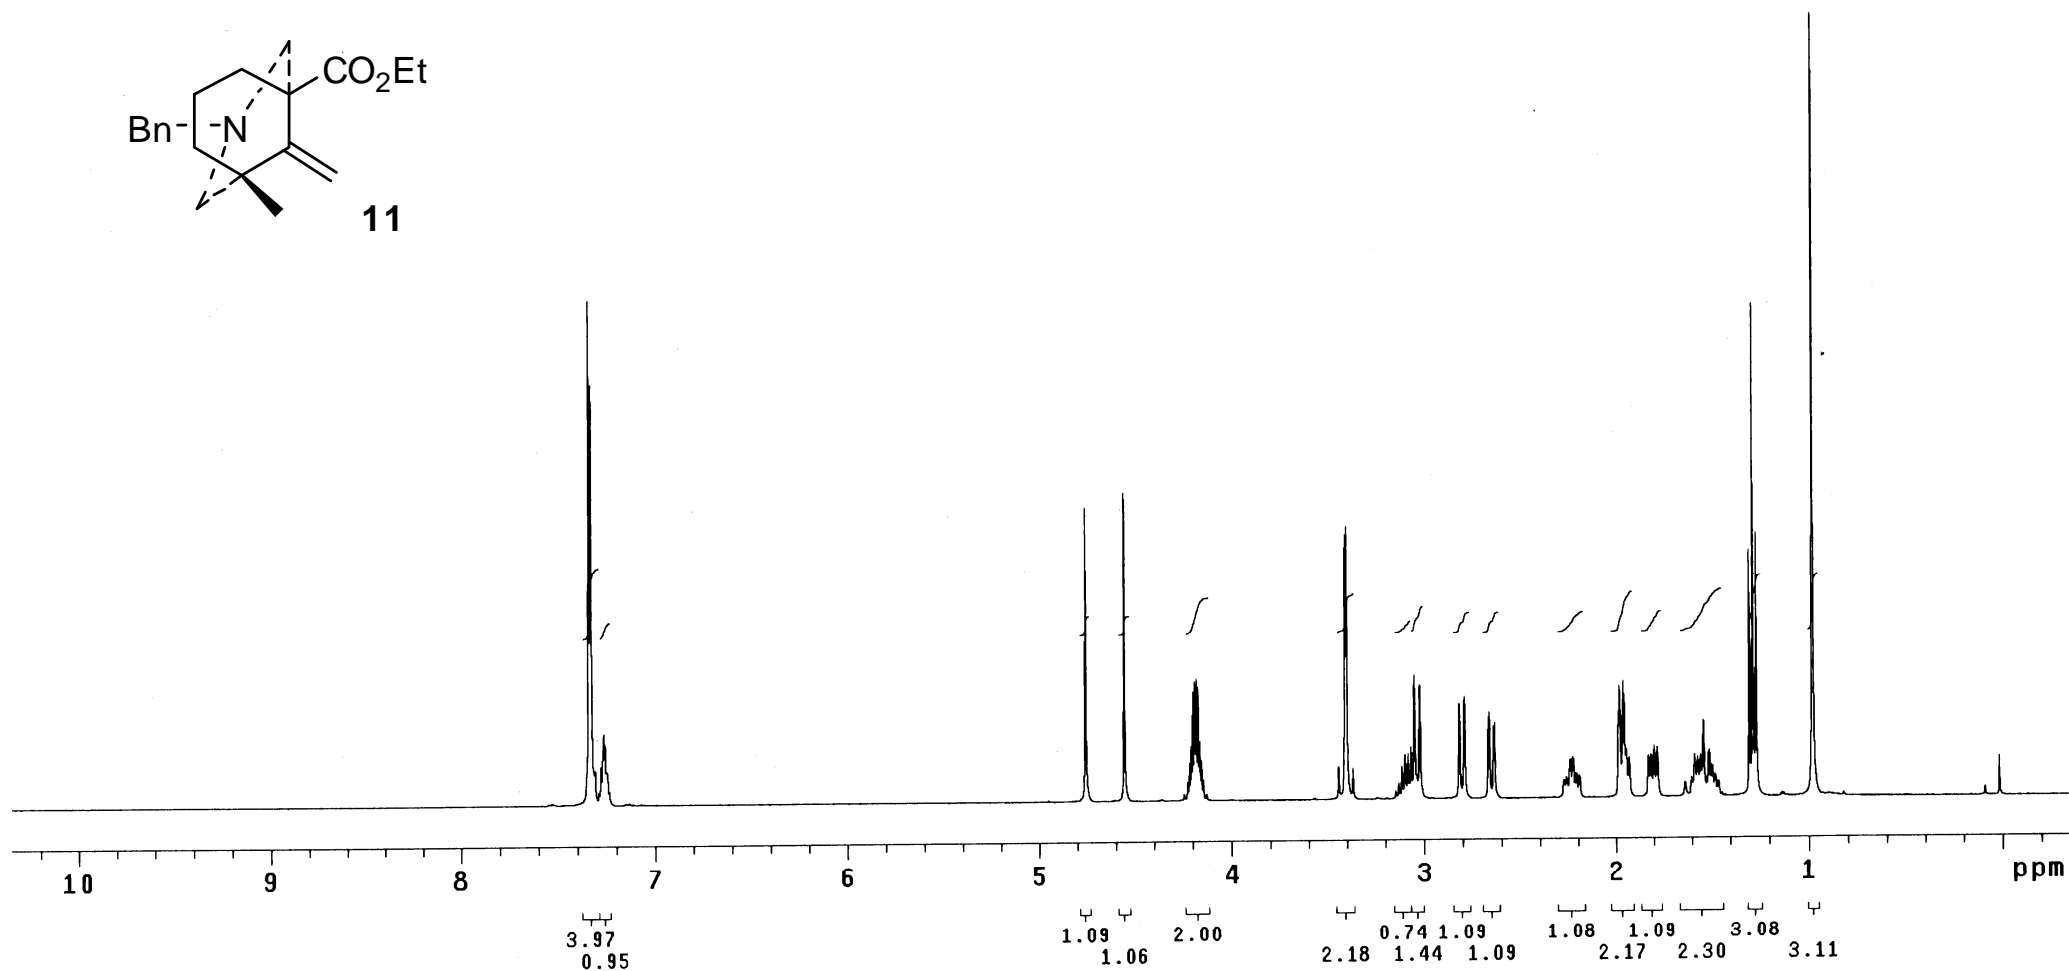

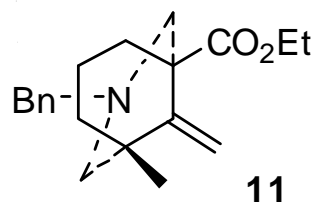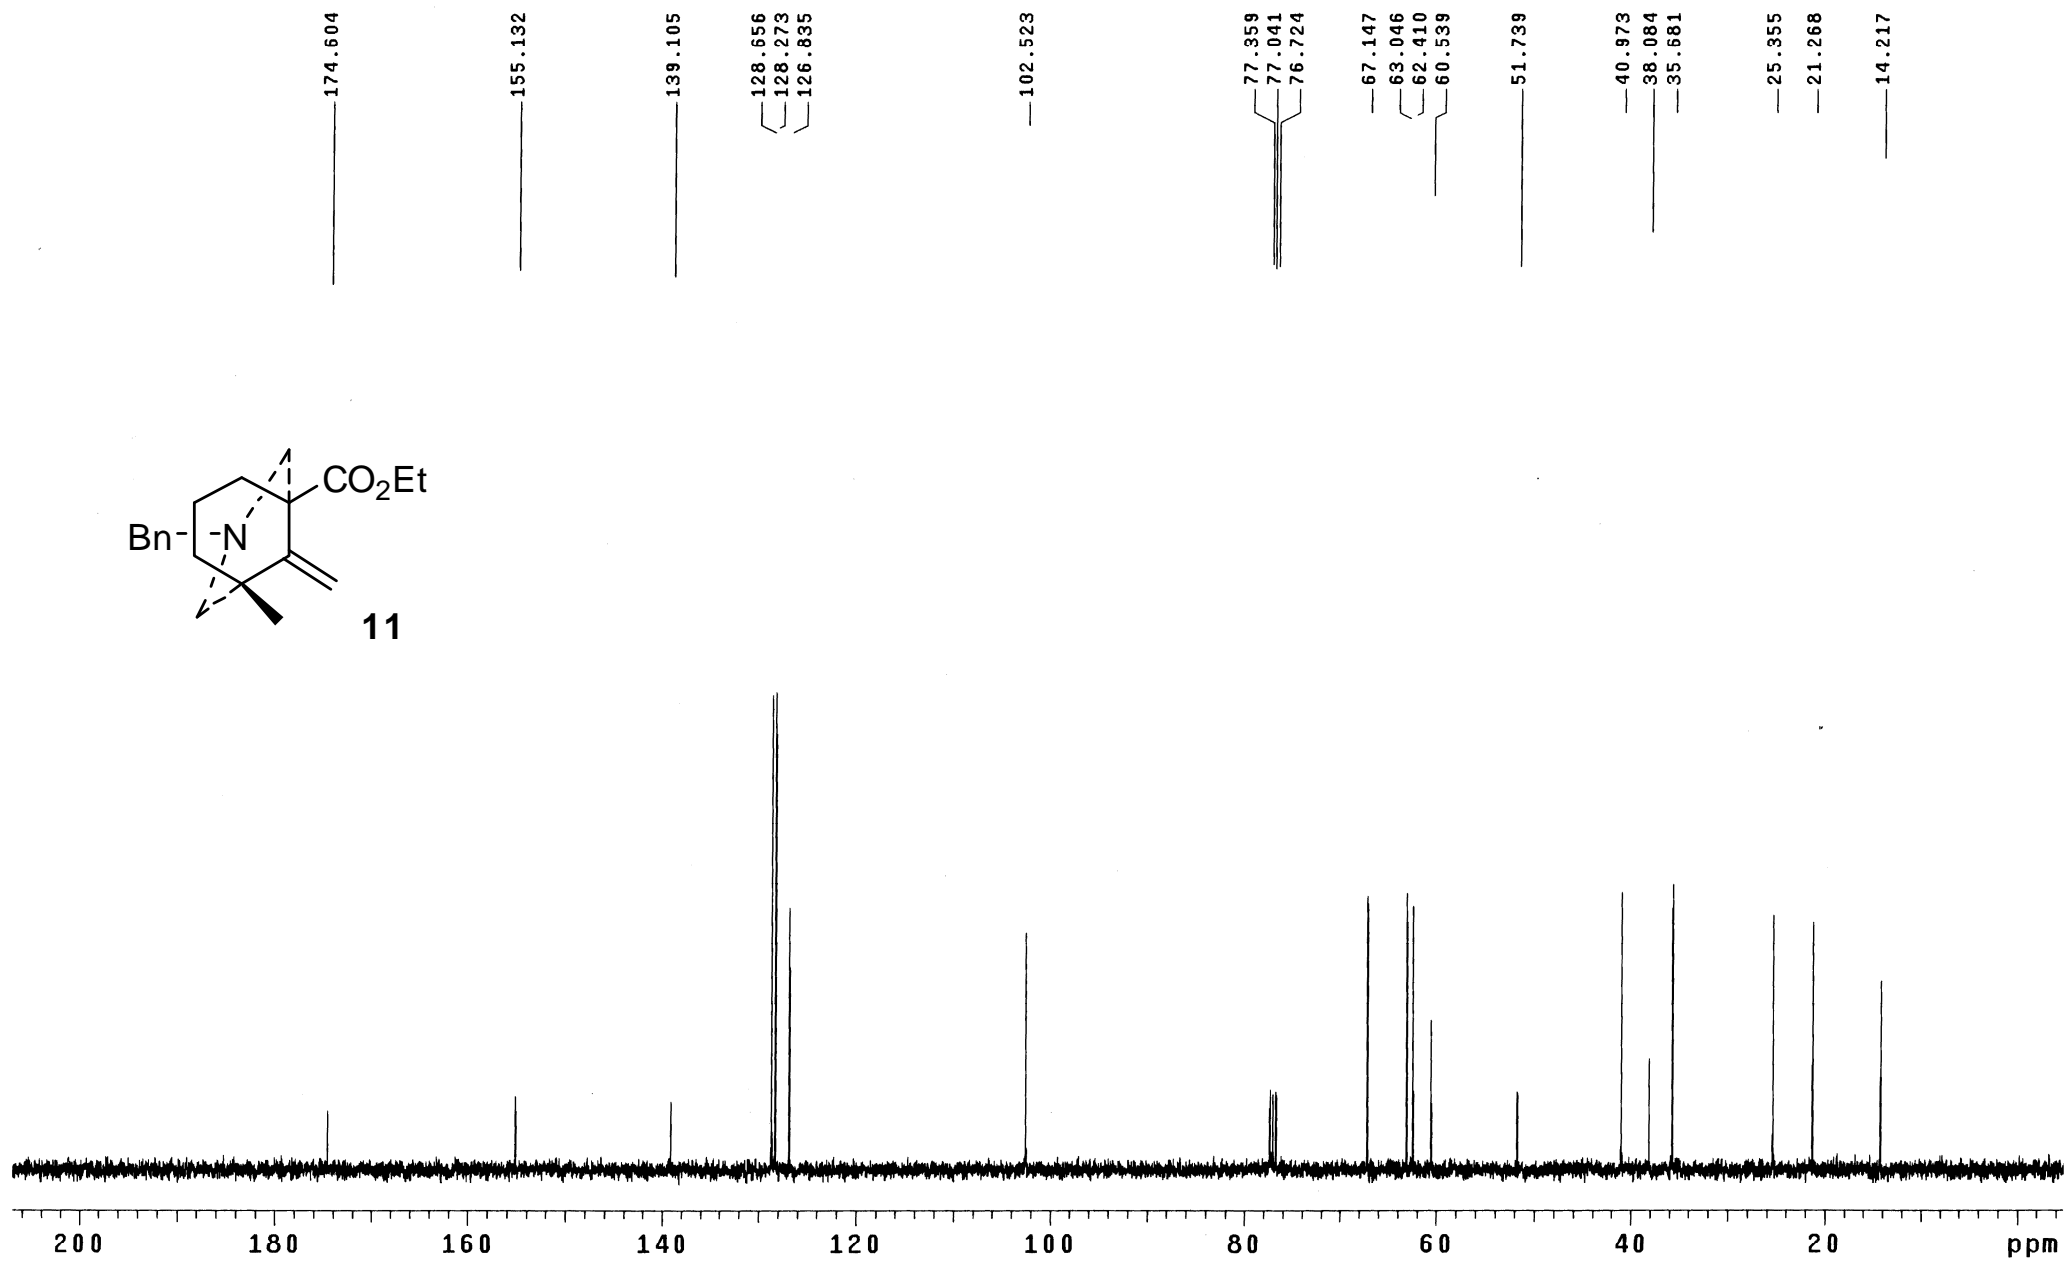

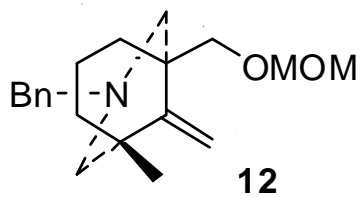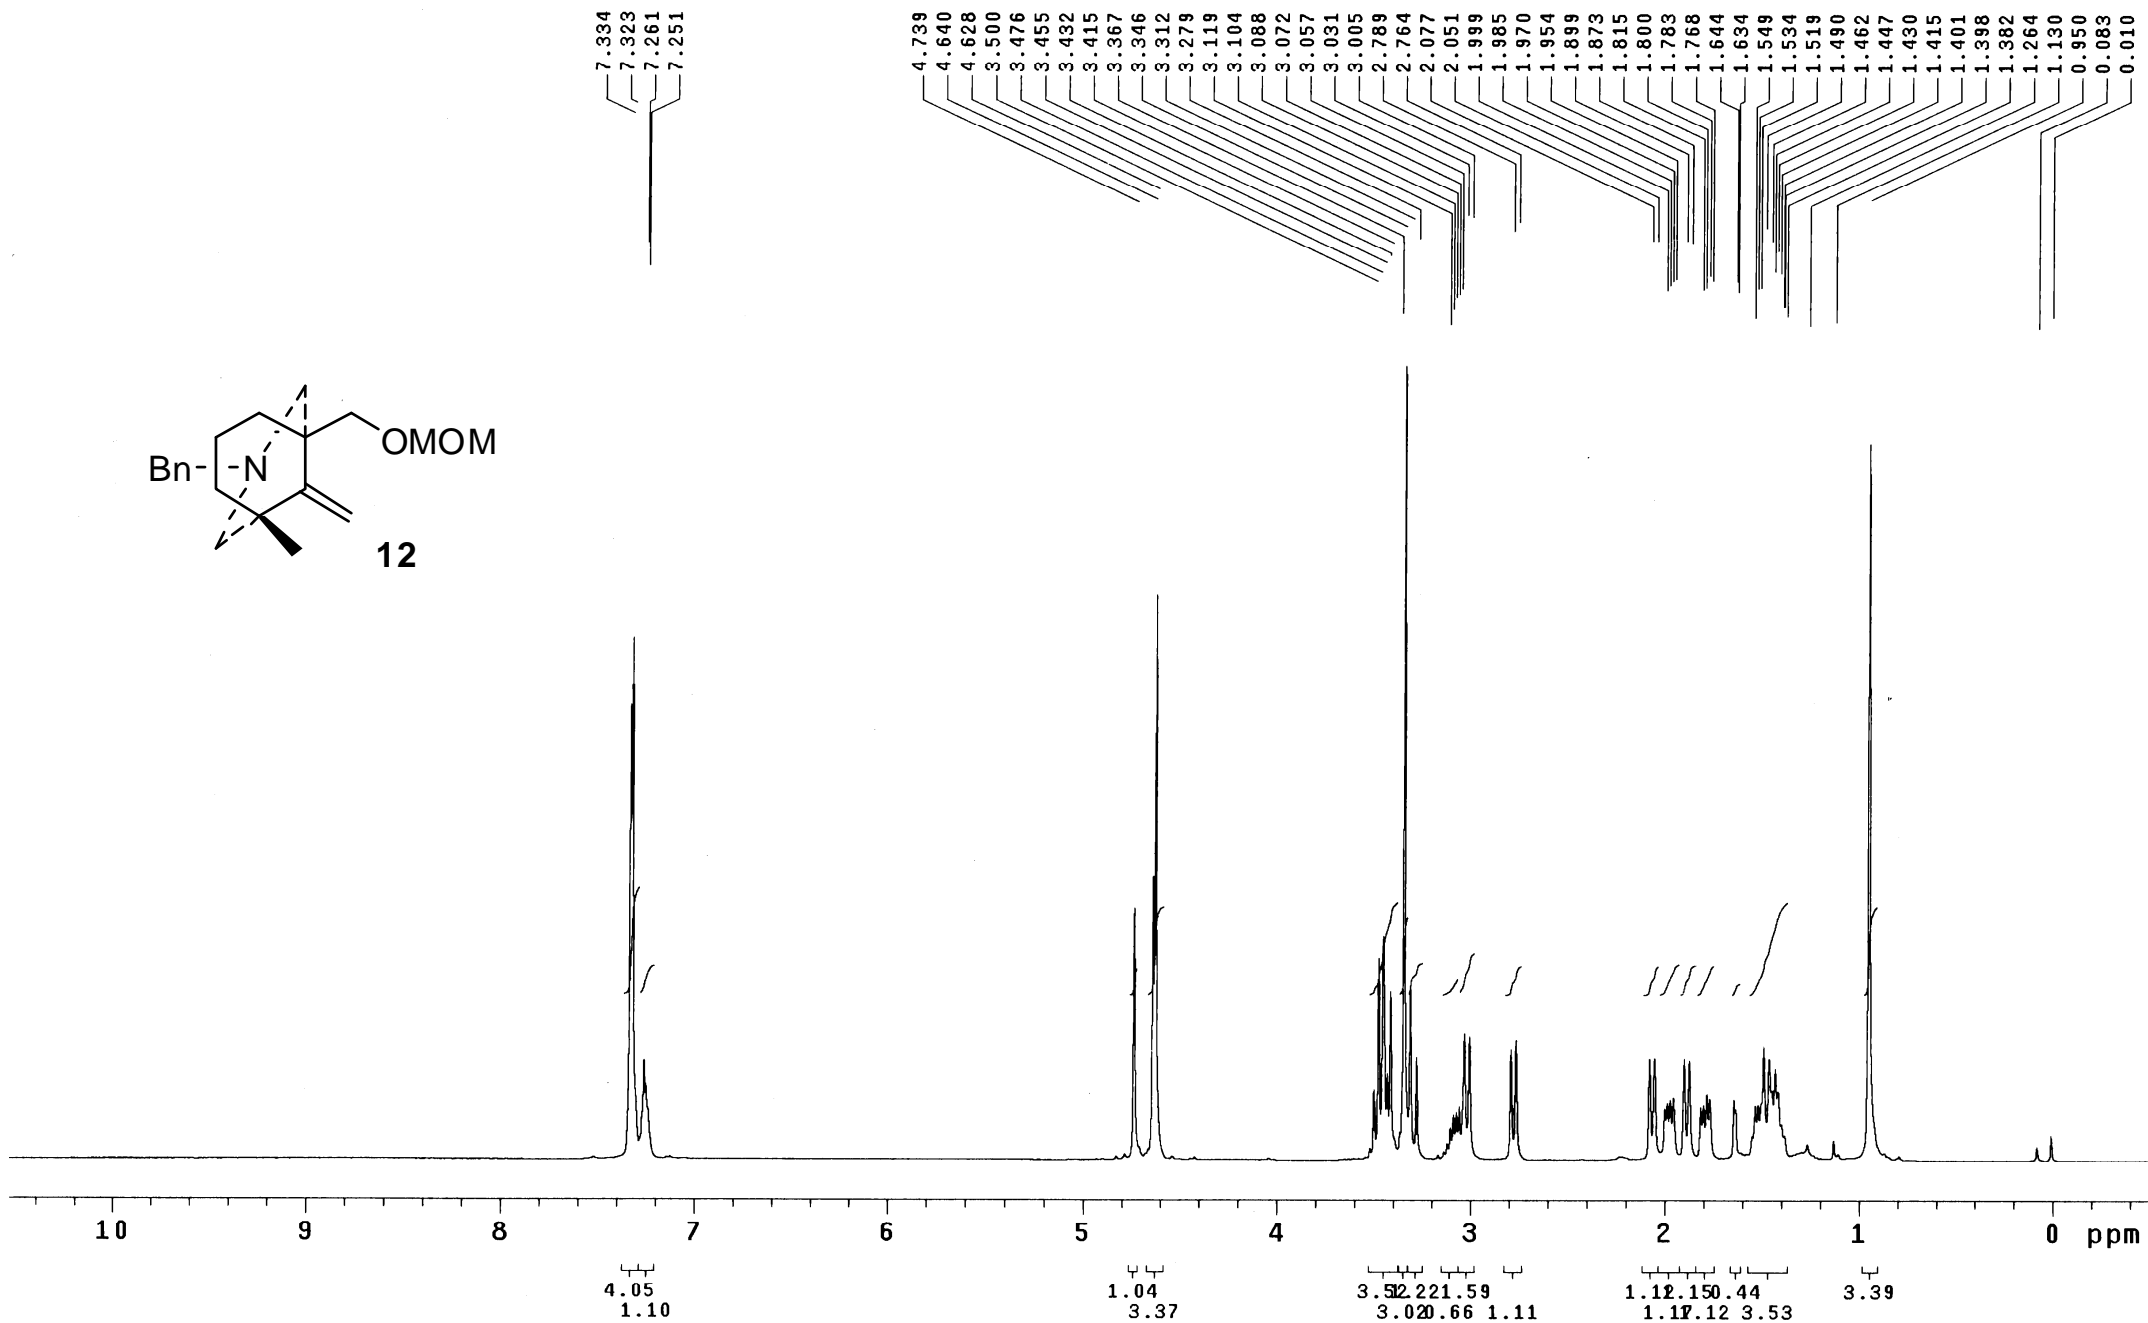

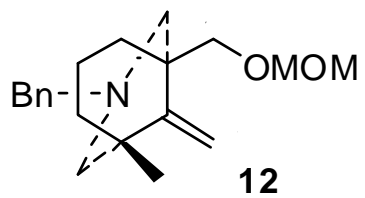

157.624

139.373

128.622  
128.197  
126.697

100.249  
96.803

77.341  
77.023  
76.705  
74.291

67.144  
63.383  
63.190

55.214

41.949  
41.531  
38.406  
36.592

25.284  
21.416

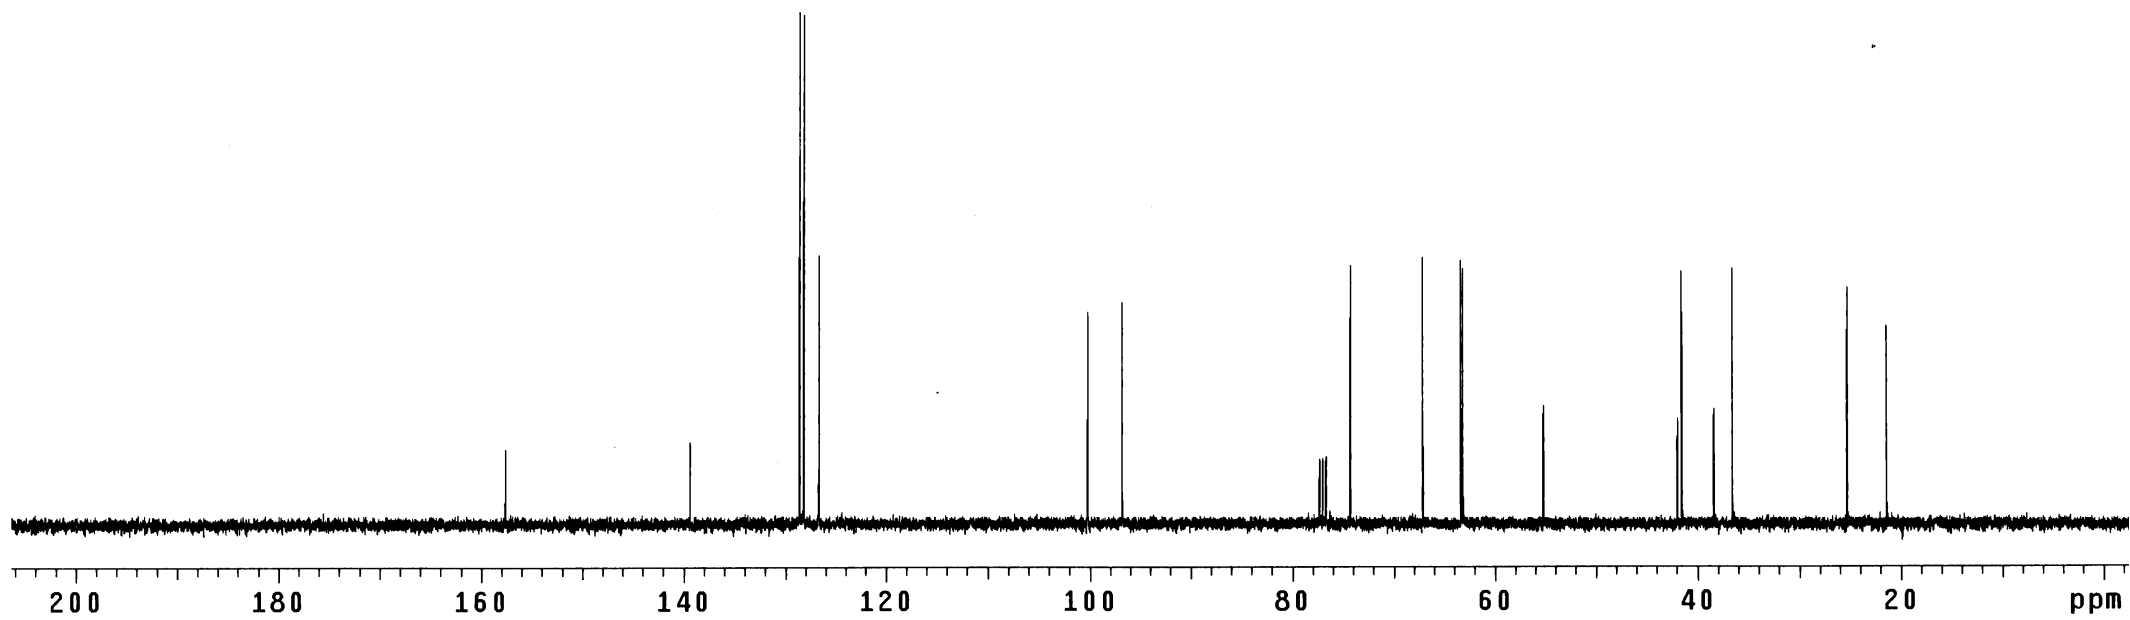

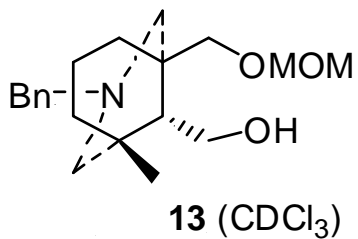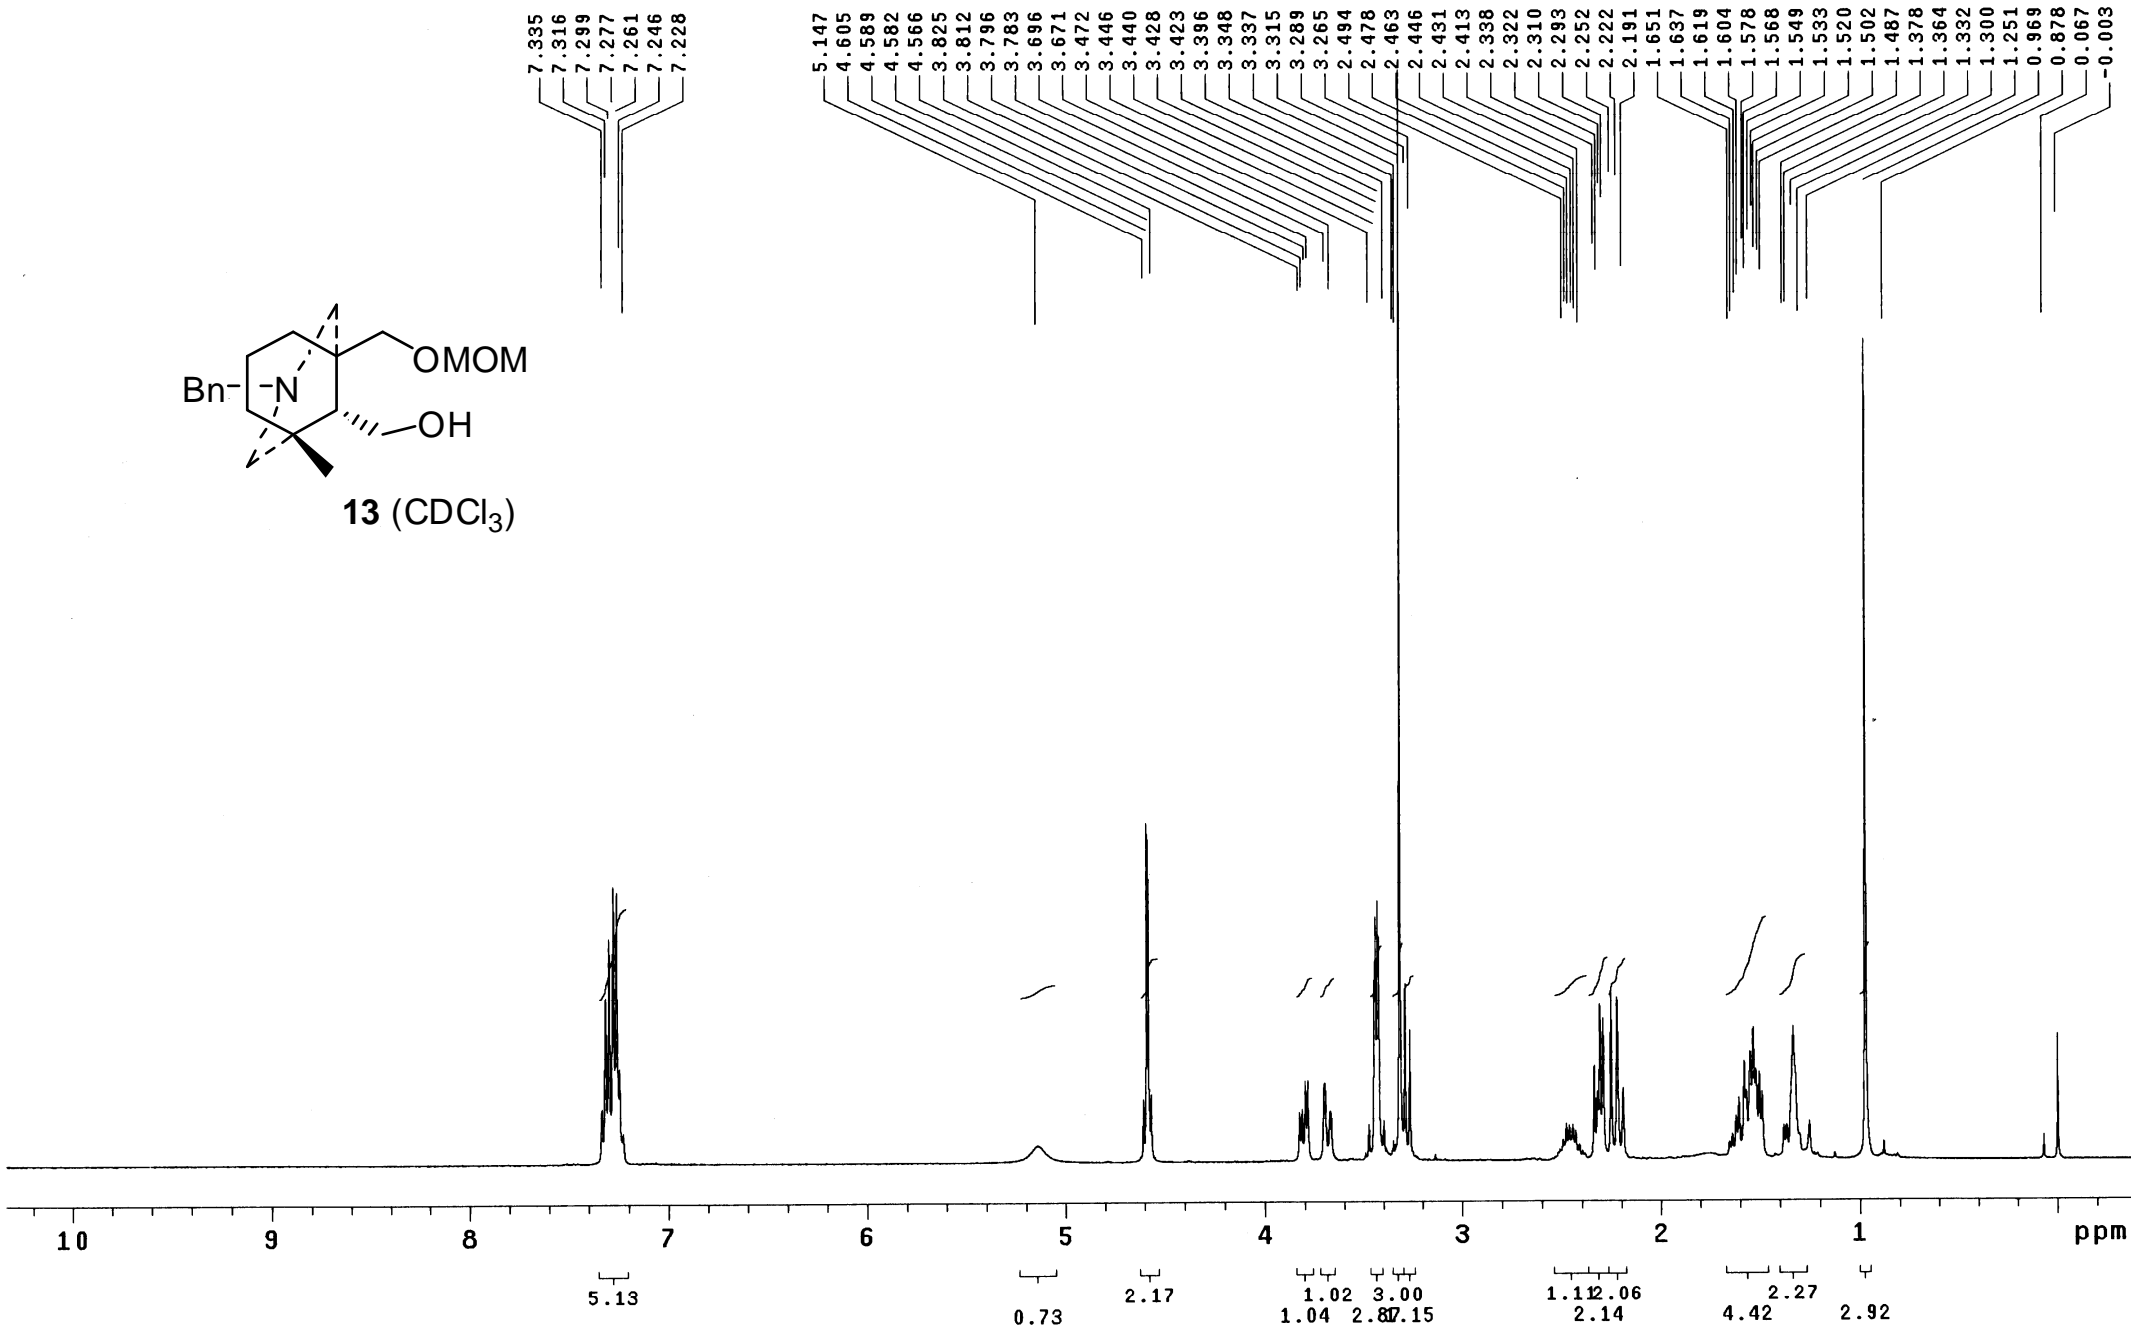



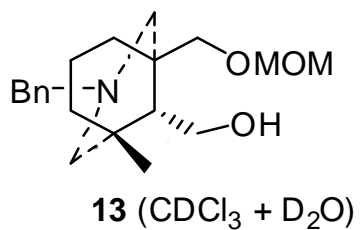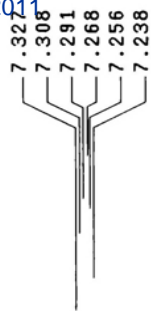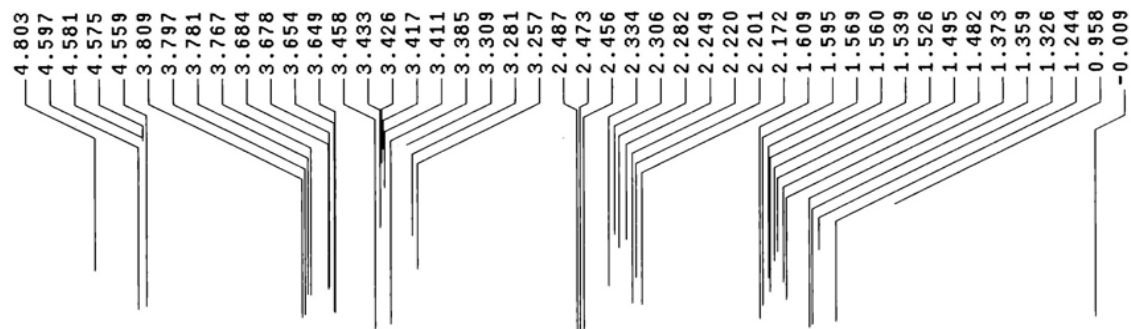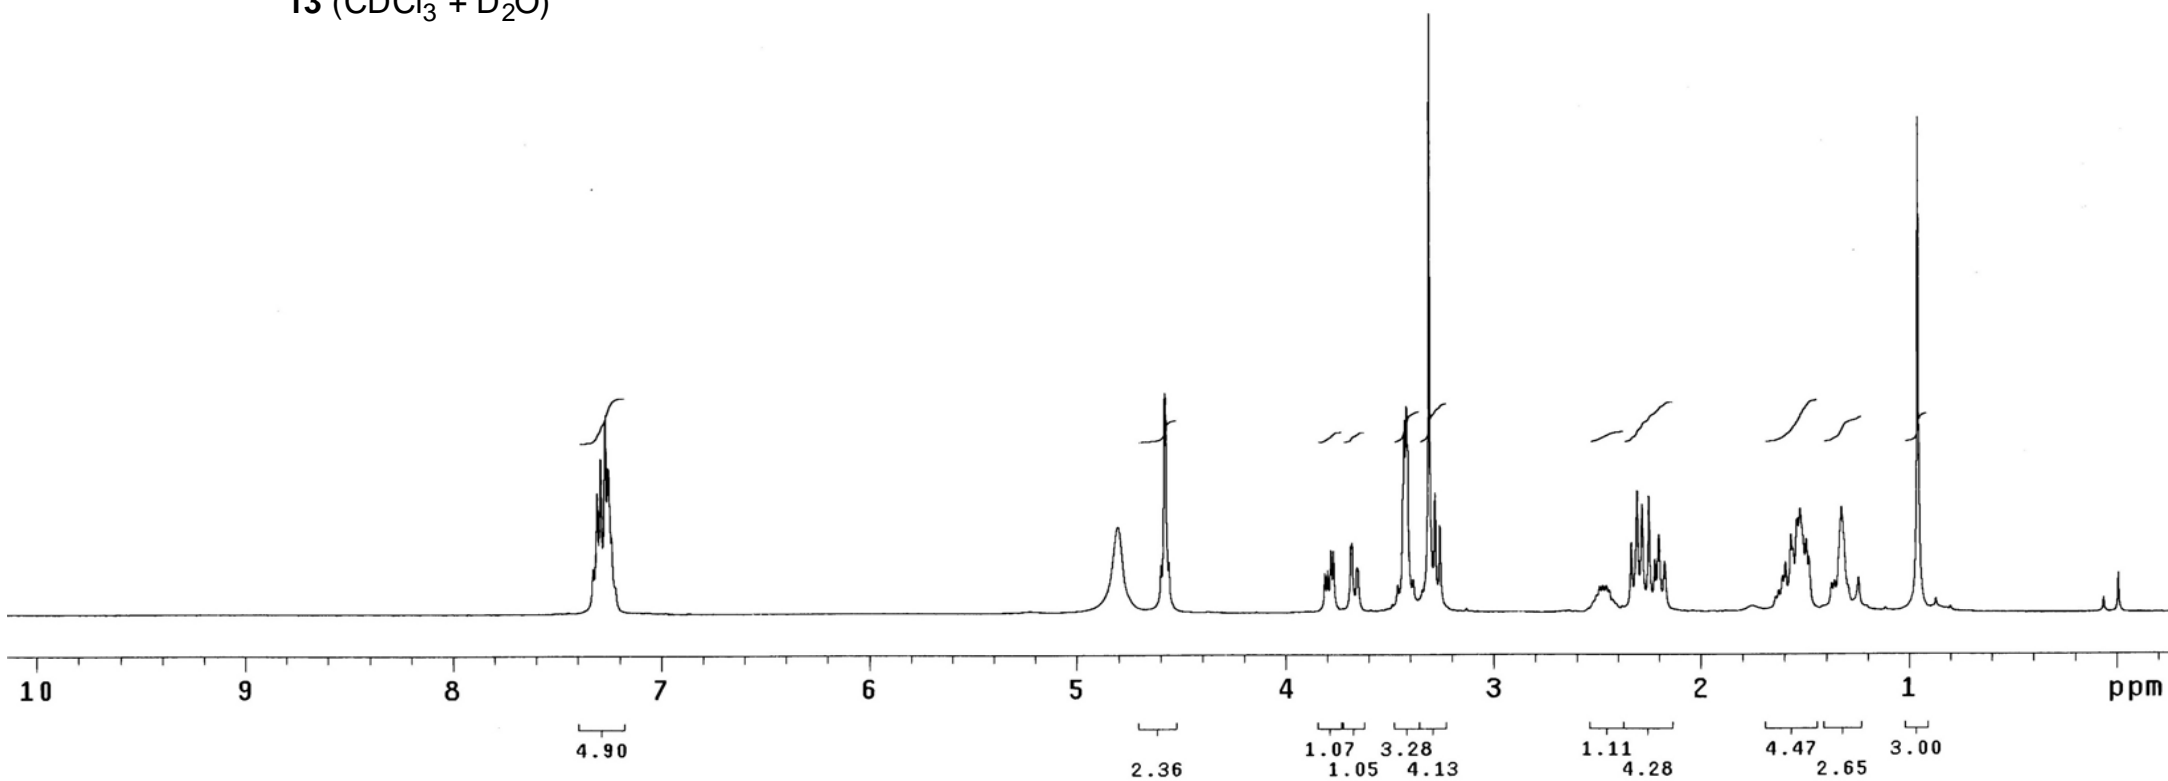

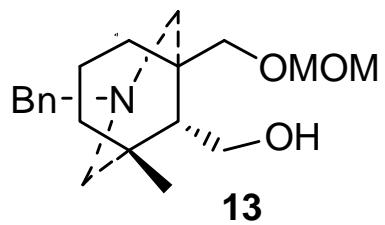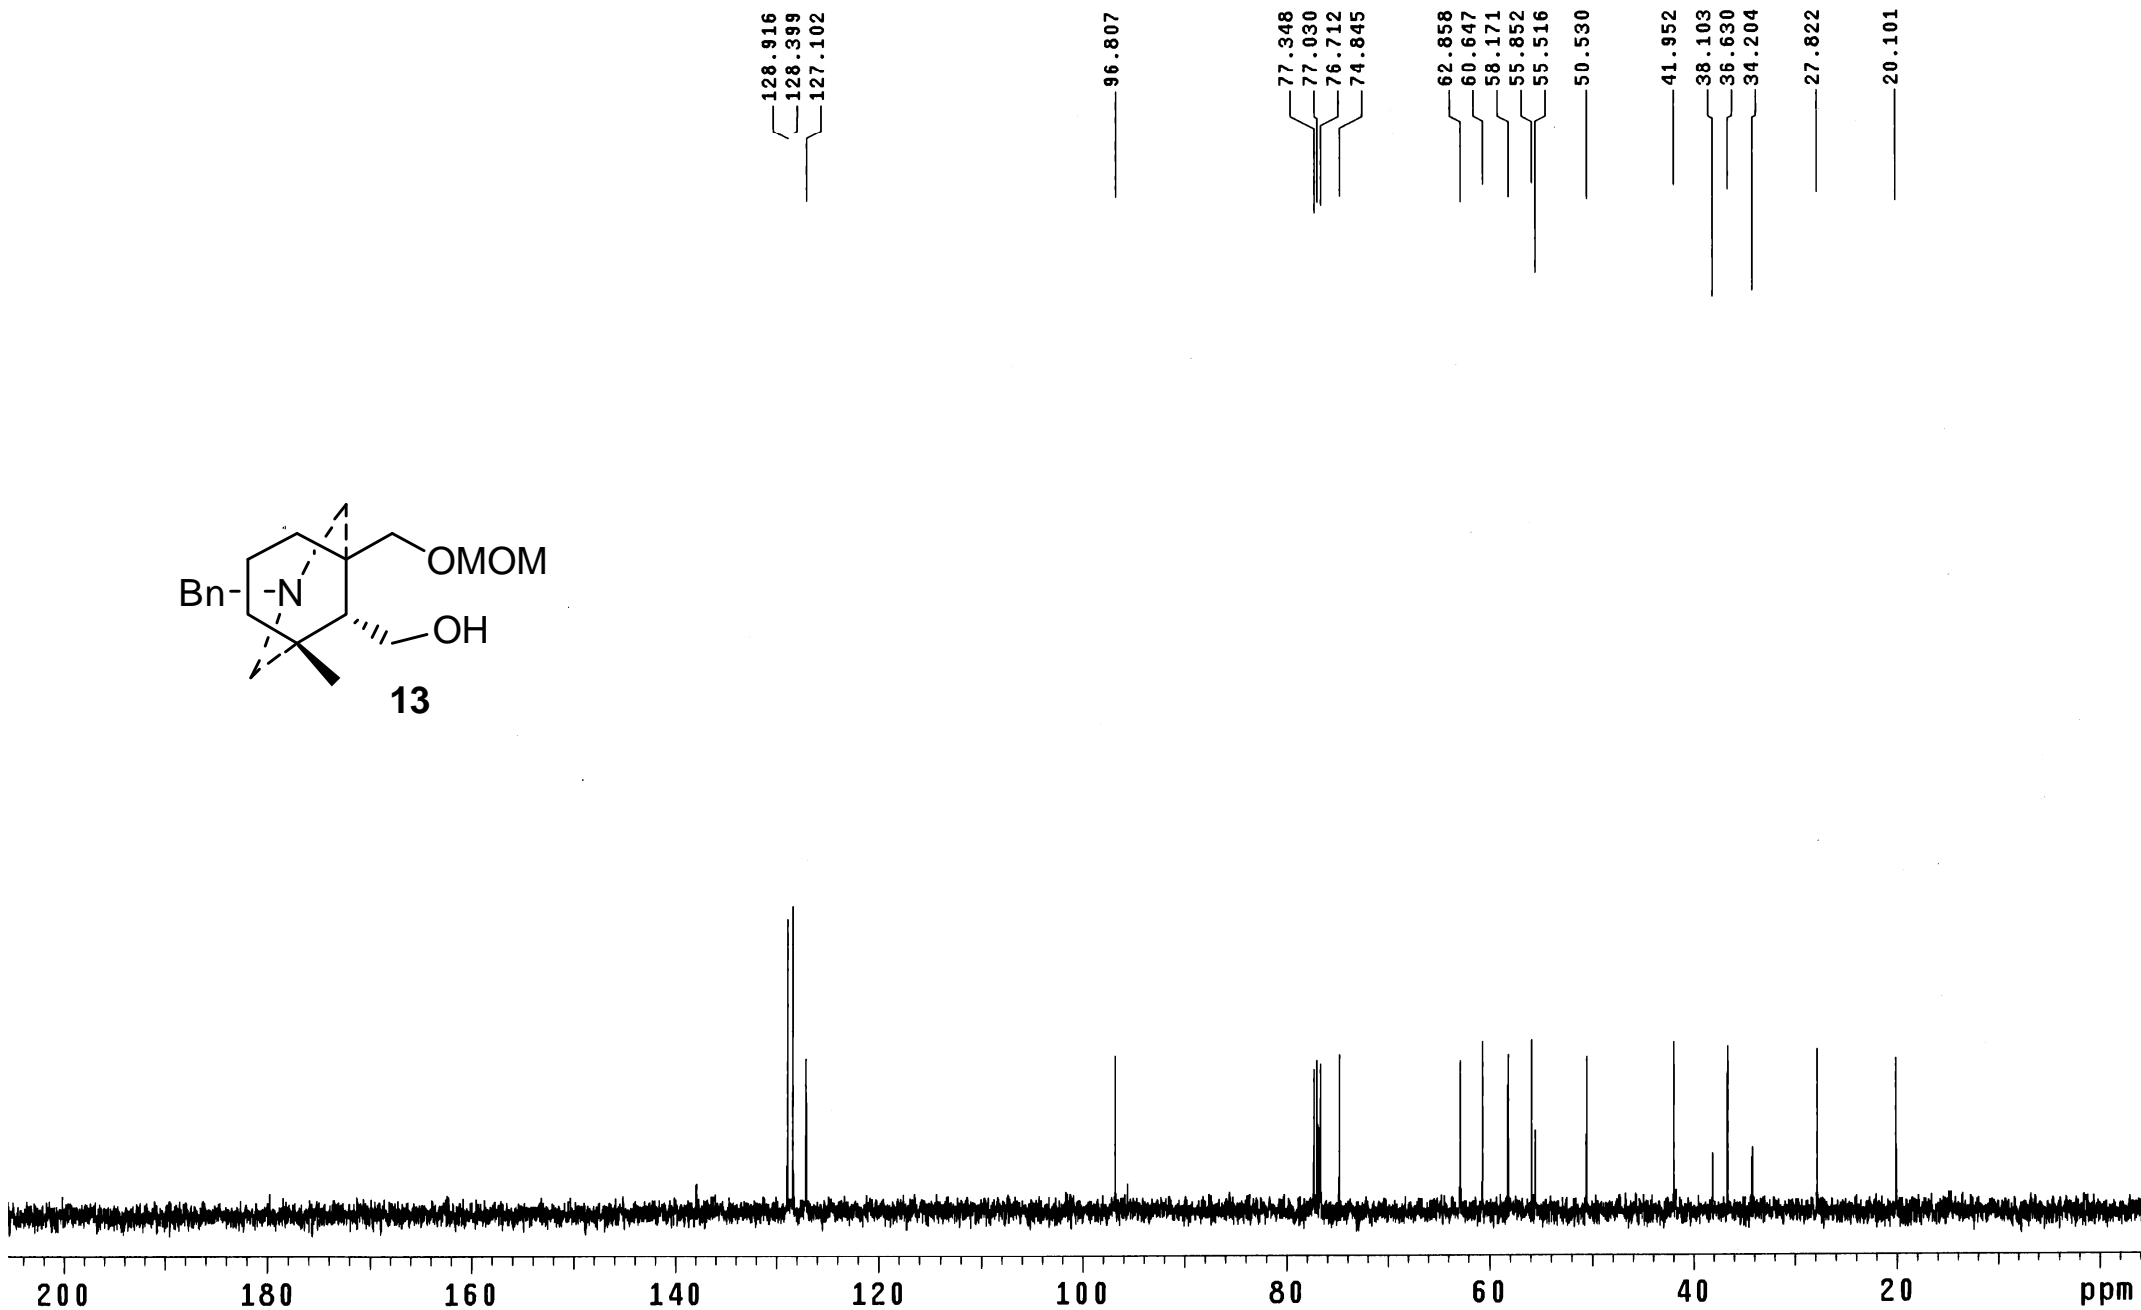

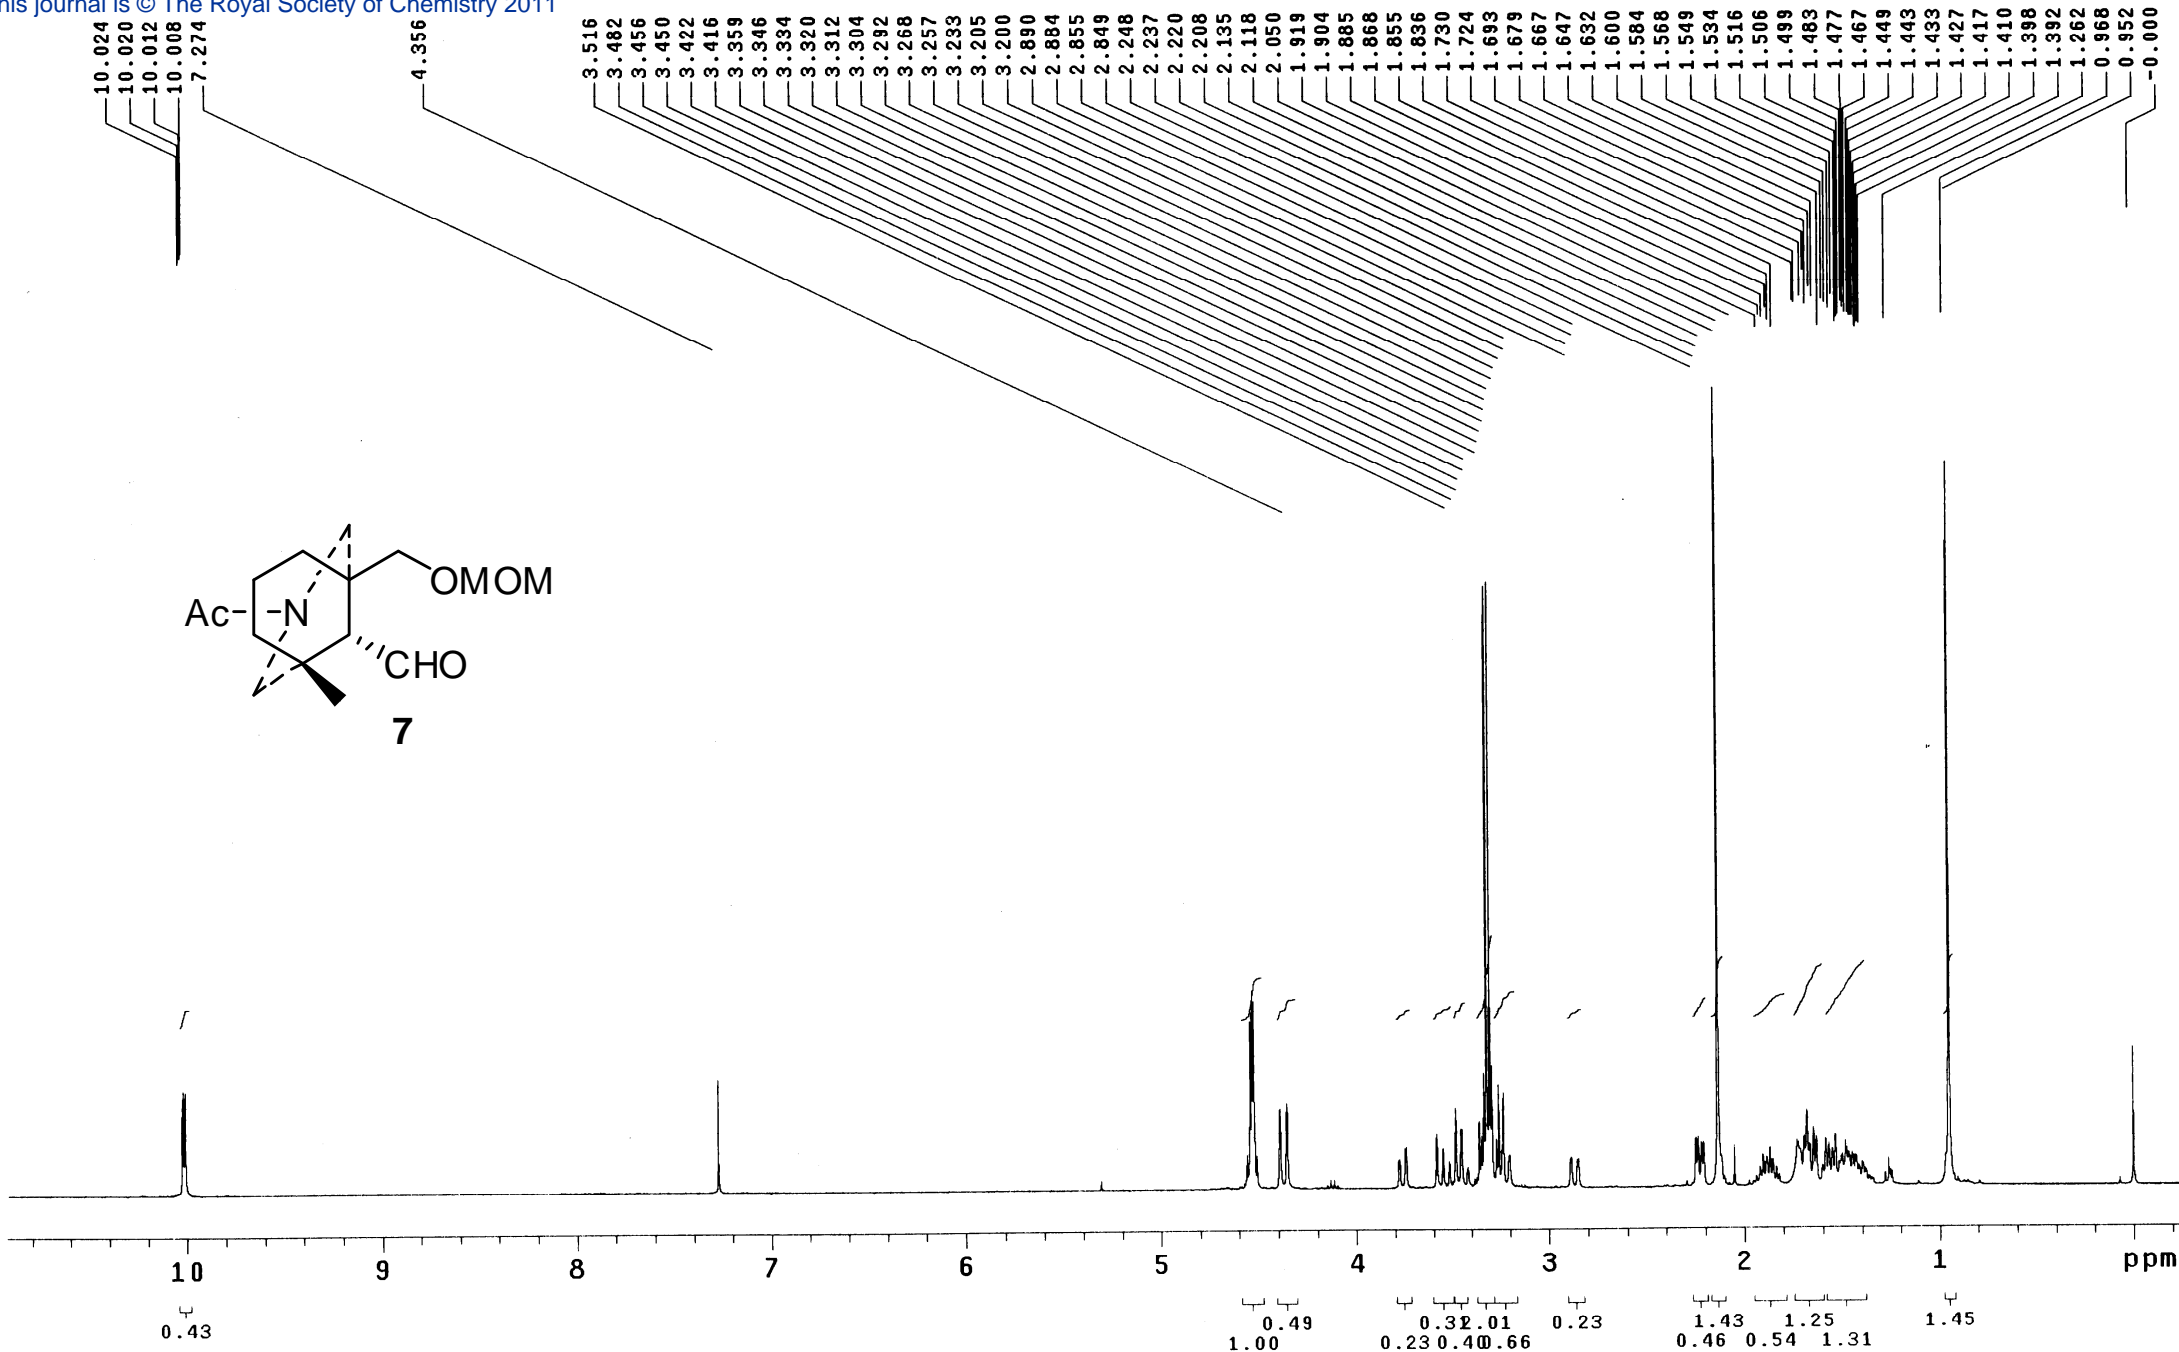

204.417  
204.298

169.739

96.696  
96.644

77.341  
77.022  
76.702  
73.665

60.073  
60.026  
55.593  
55.537  
53.281  
49.550  
48.126  
44.403  
40.841  
40.526  
38.727  
38.230  
35.272  
34.952  
34.100  
33.556  
25.991  
25.928  
22.426  
19.870

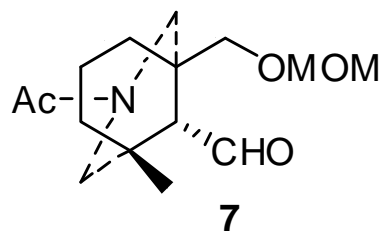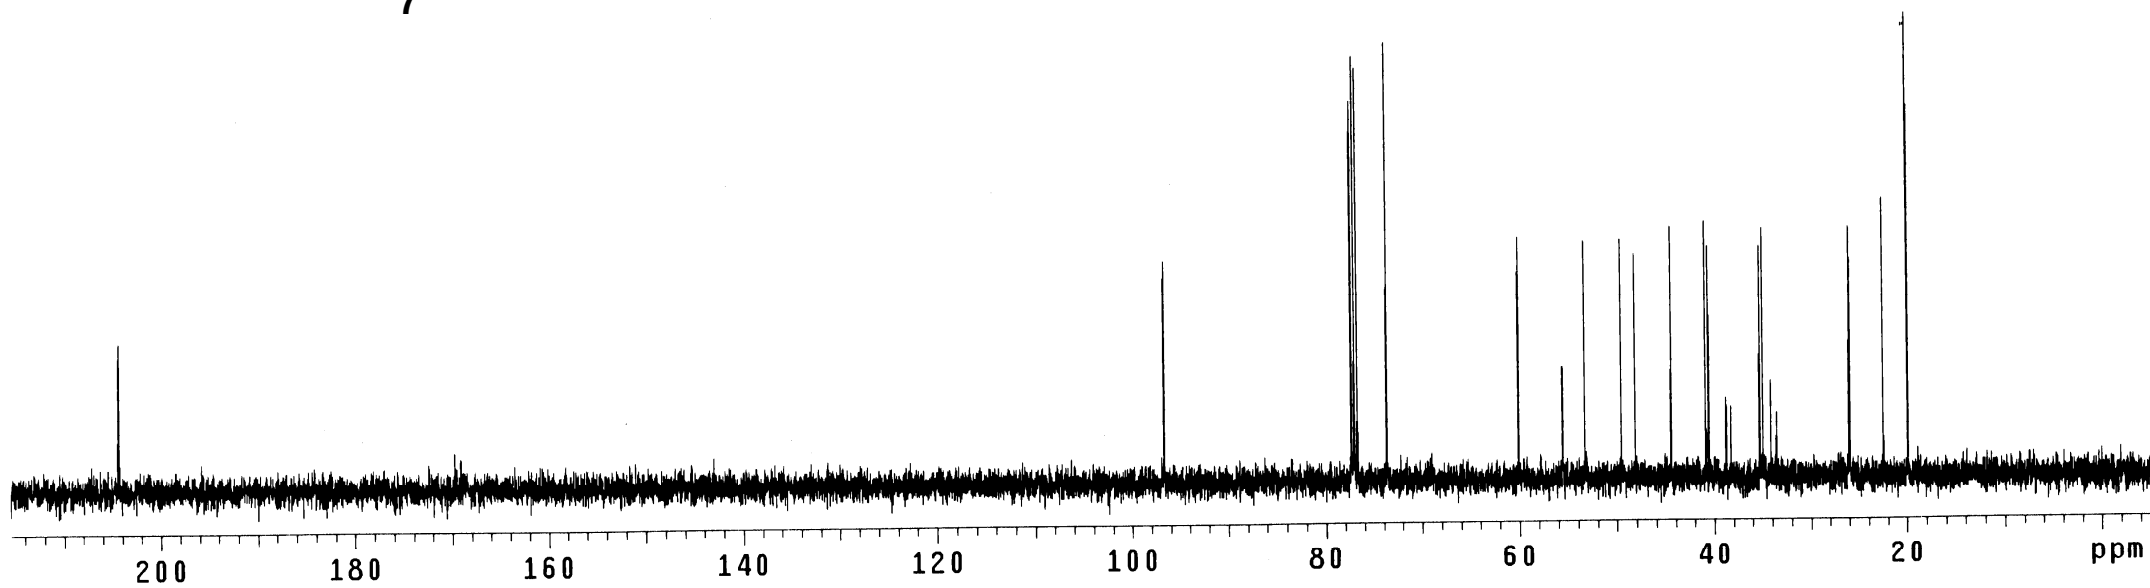

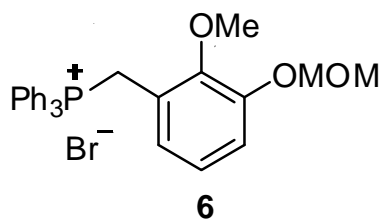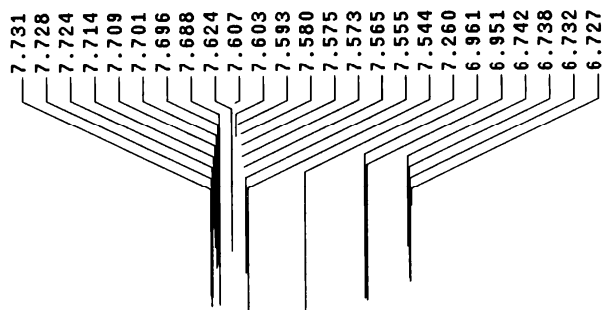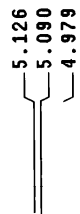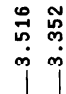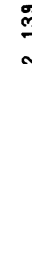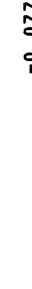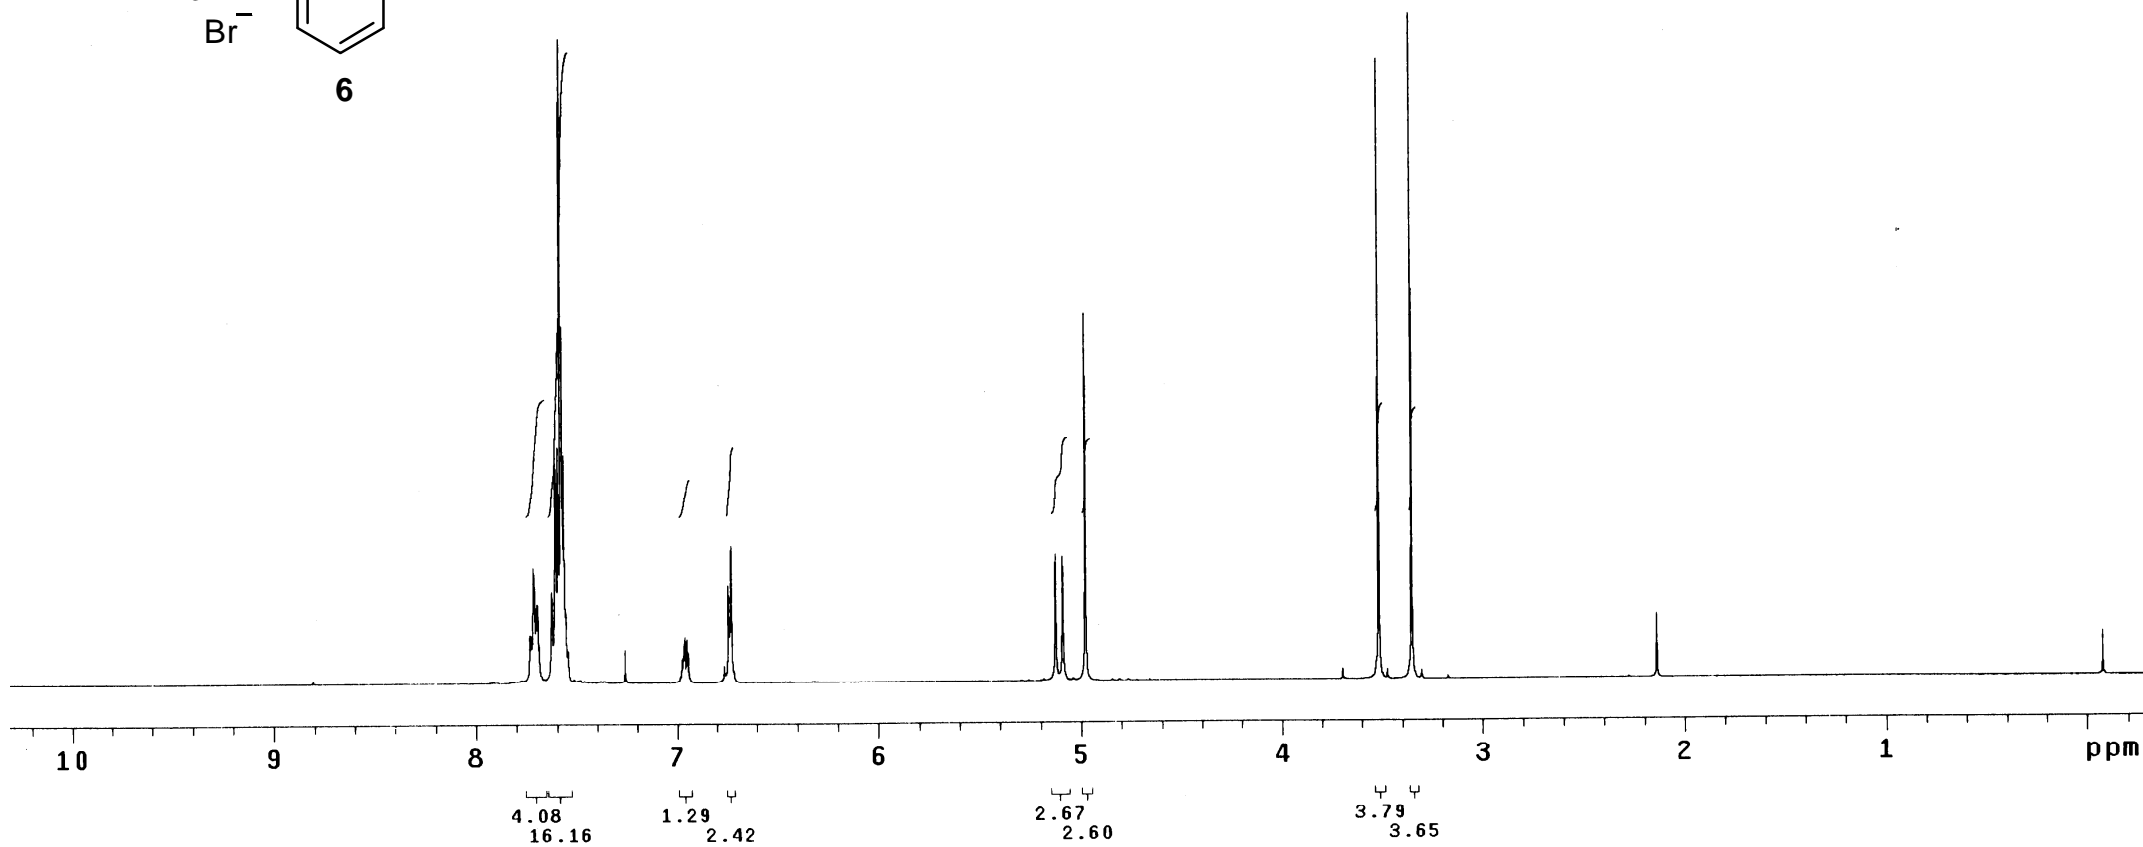

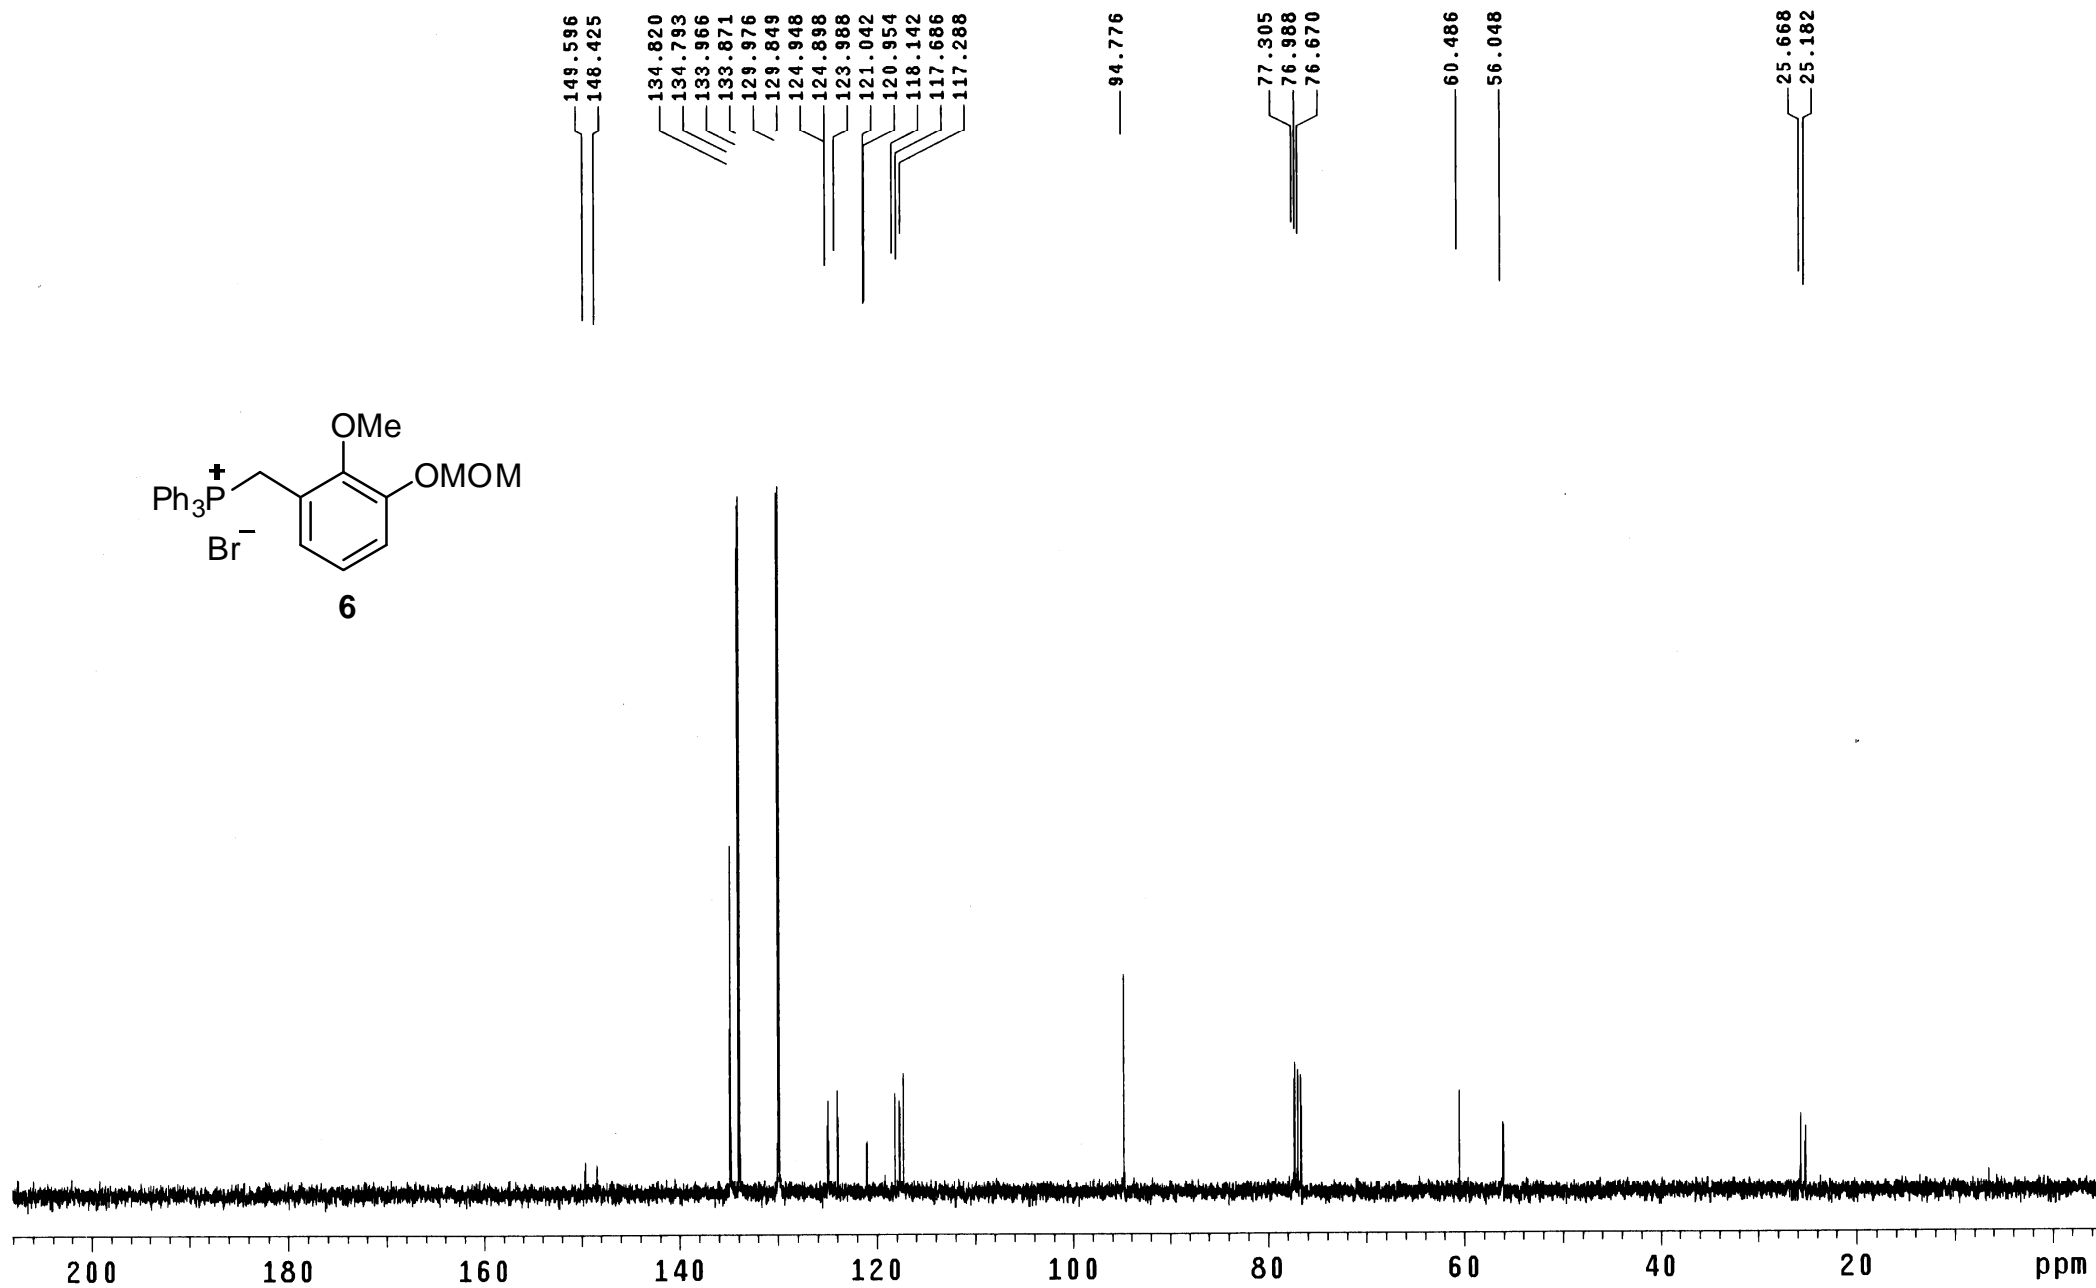

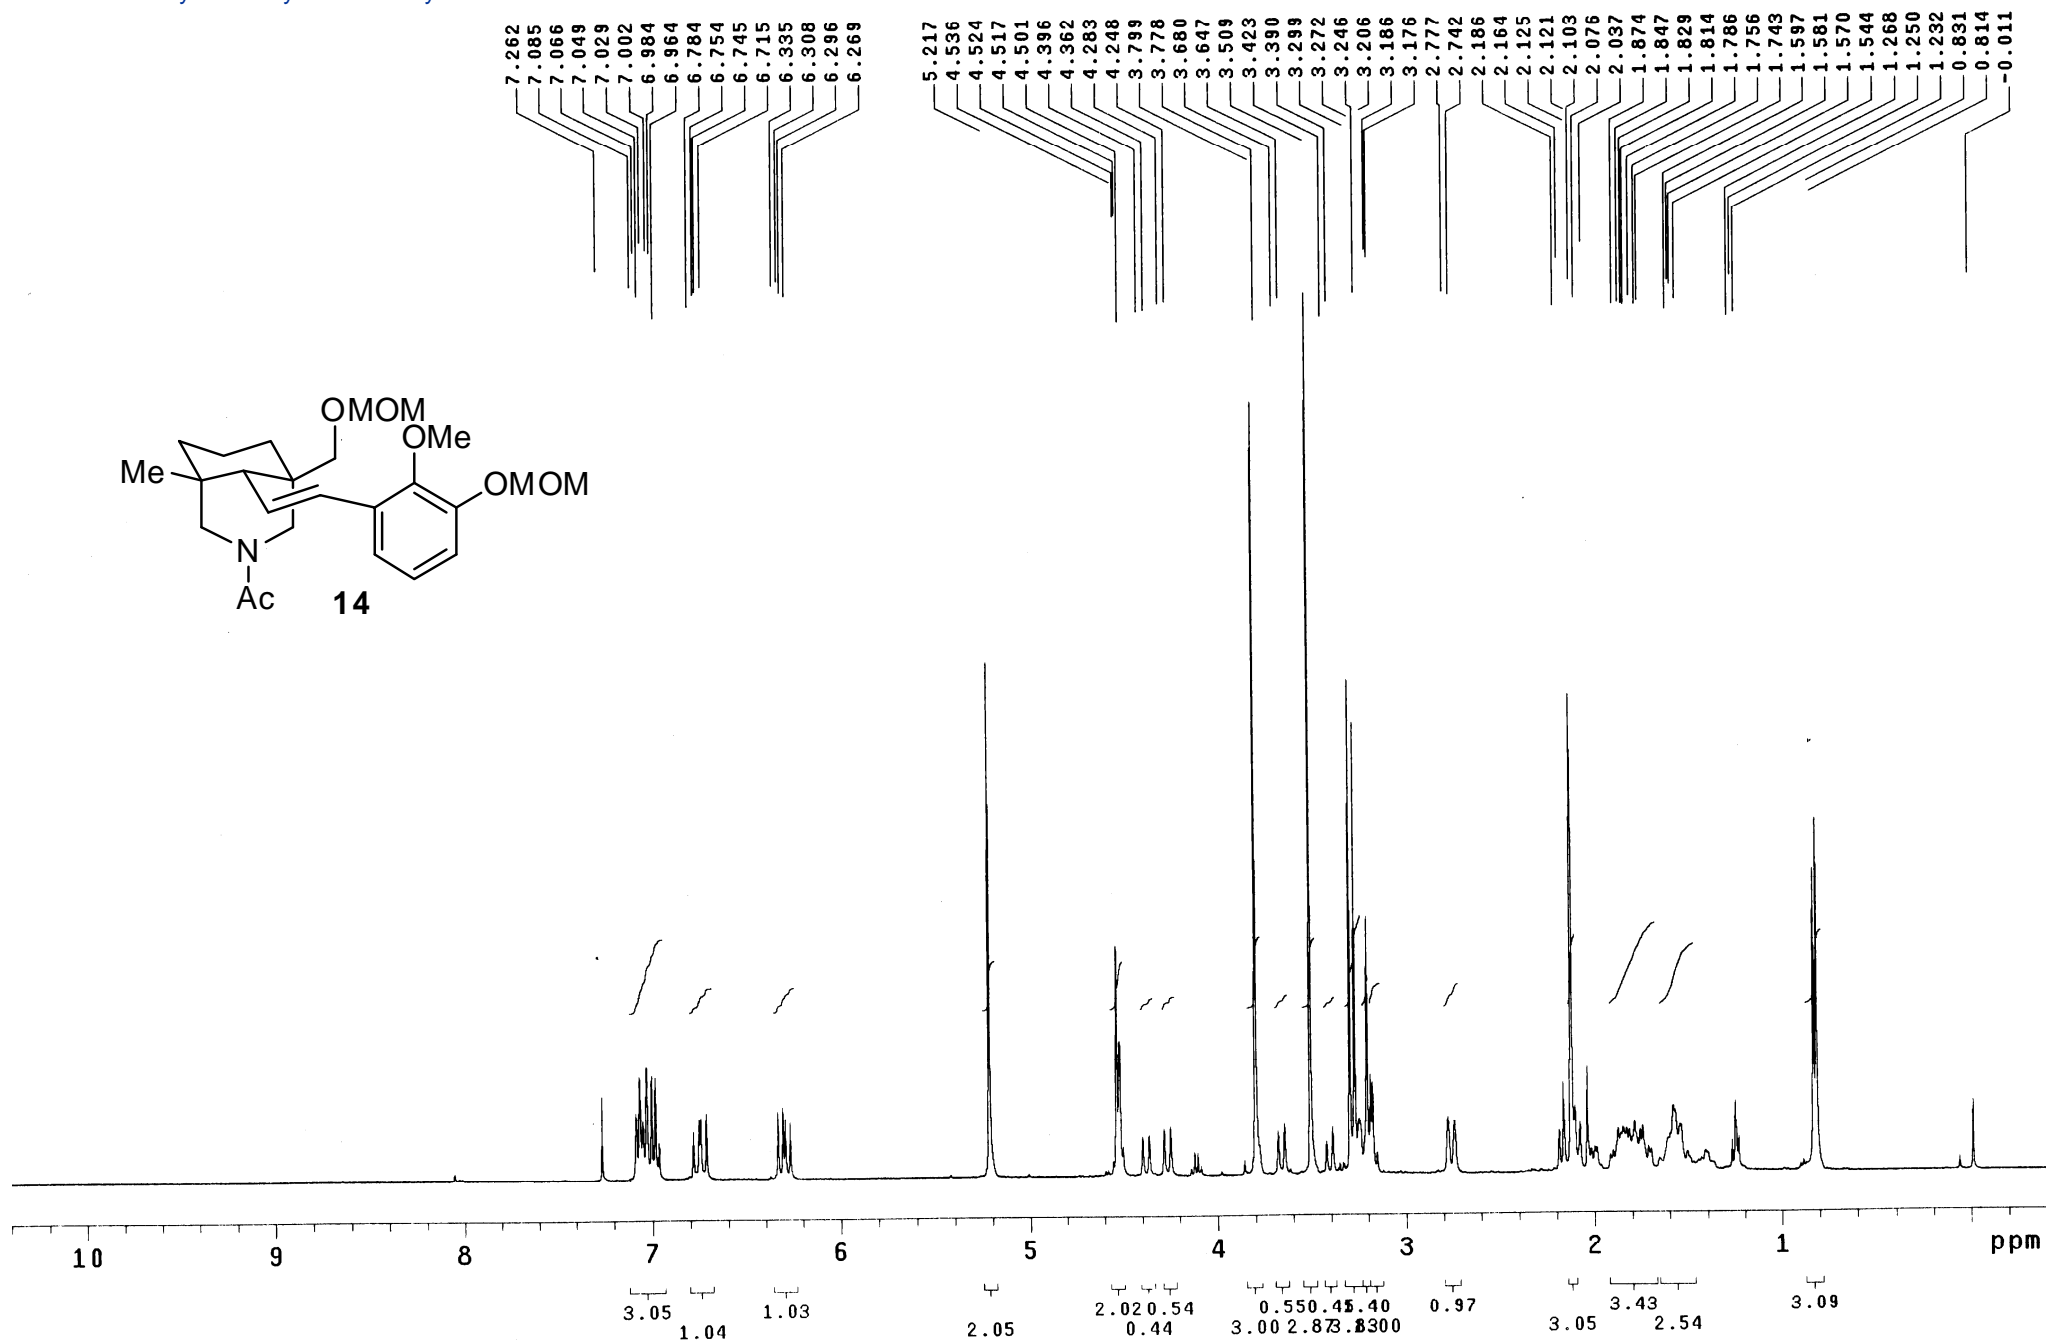

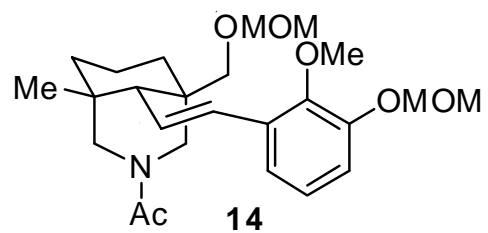

169.832

150.595

131.598

128.353

128.281

127.657

124.172

119.794

115.440

115.398

96.750

96.704

95.059

77.355

77.038

76.716

75.125

74.612

60.976

56.204

55.198

52.994

52.803

52.241

49.272

47.879

44.286

40.690

40.464

38.237

37.621

35.222

34.908

34.139

33.439

27.092

22.493

20.247

-0.334

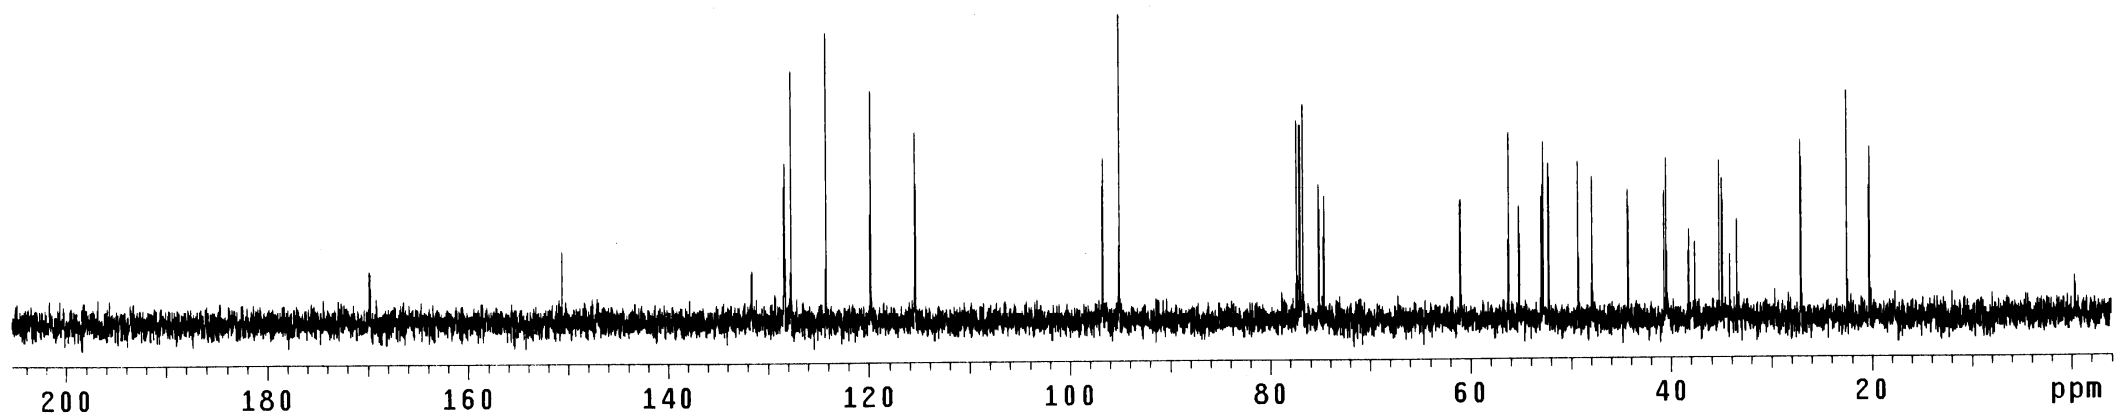



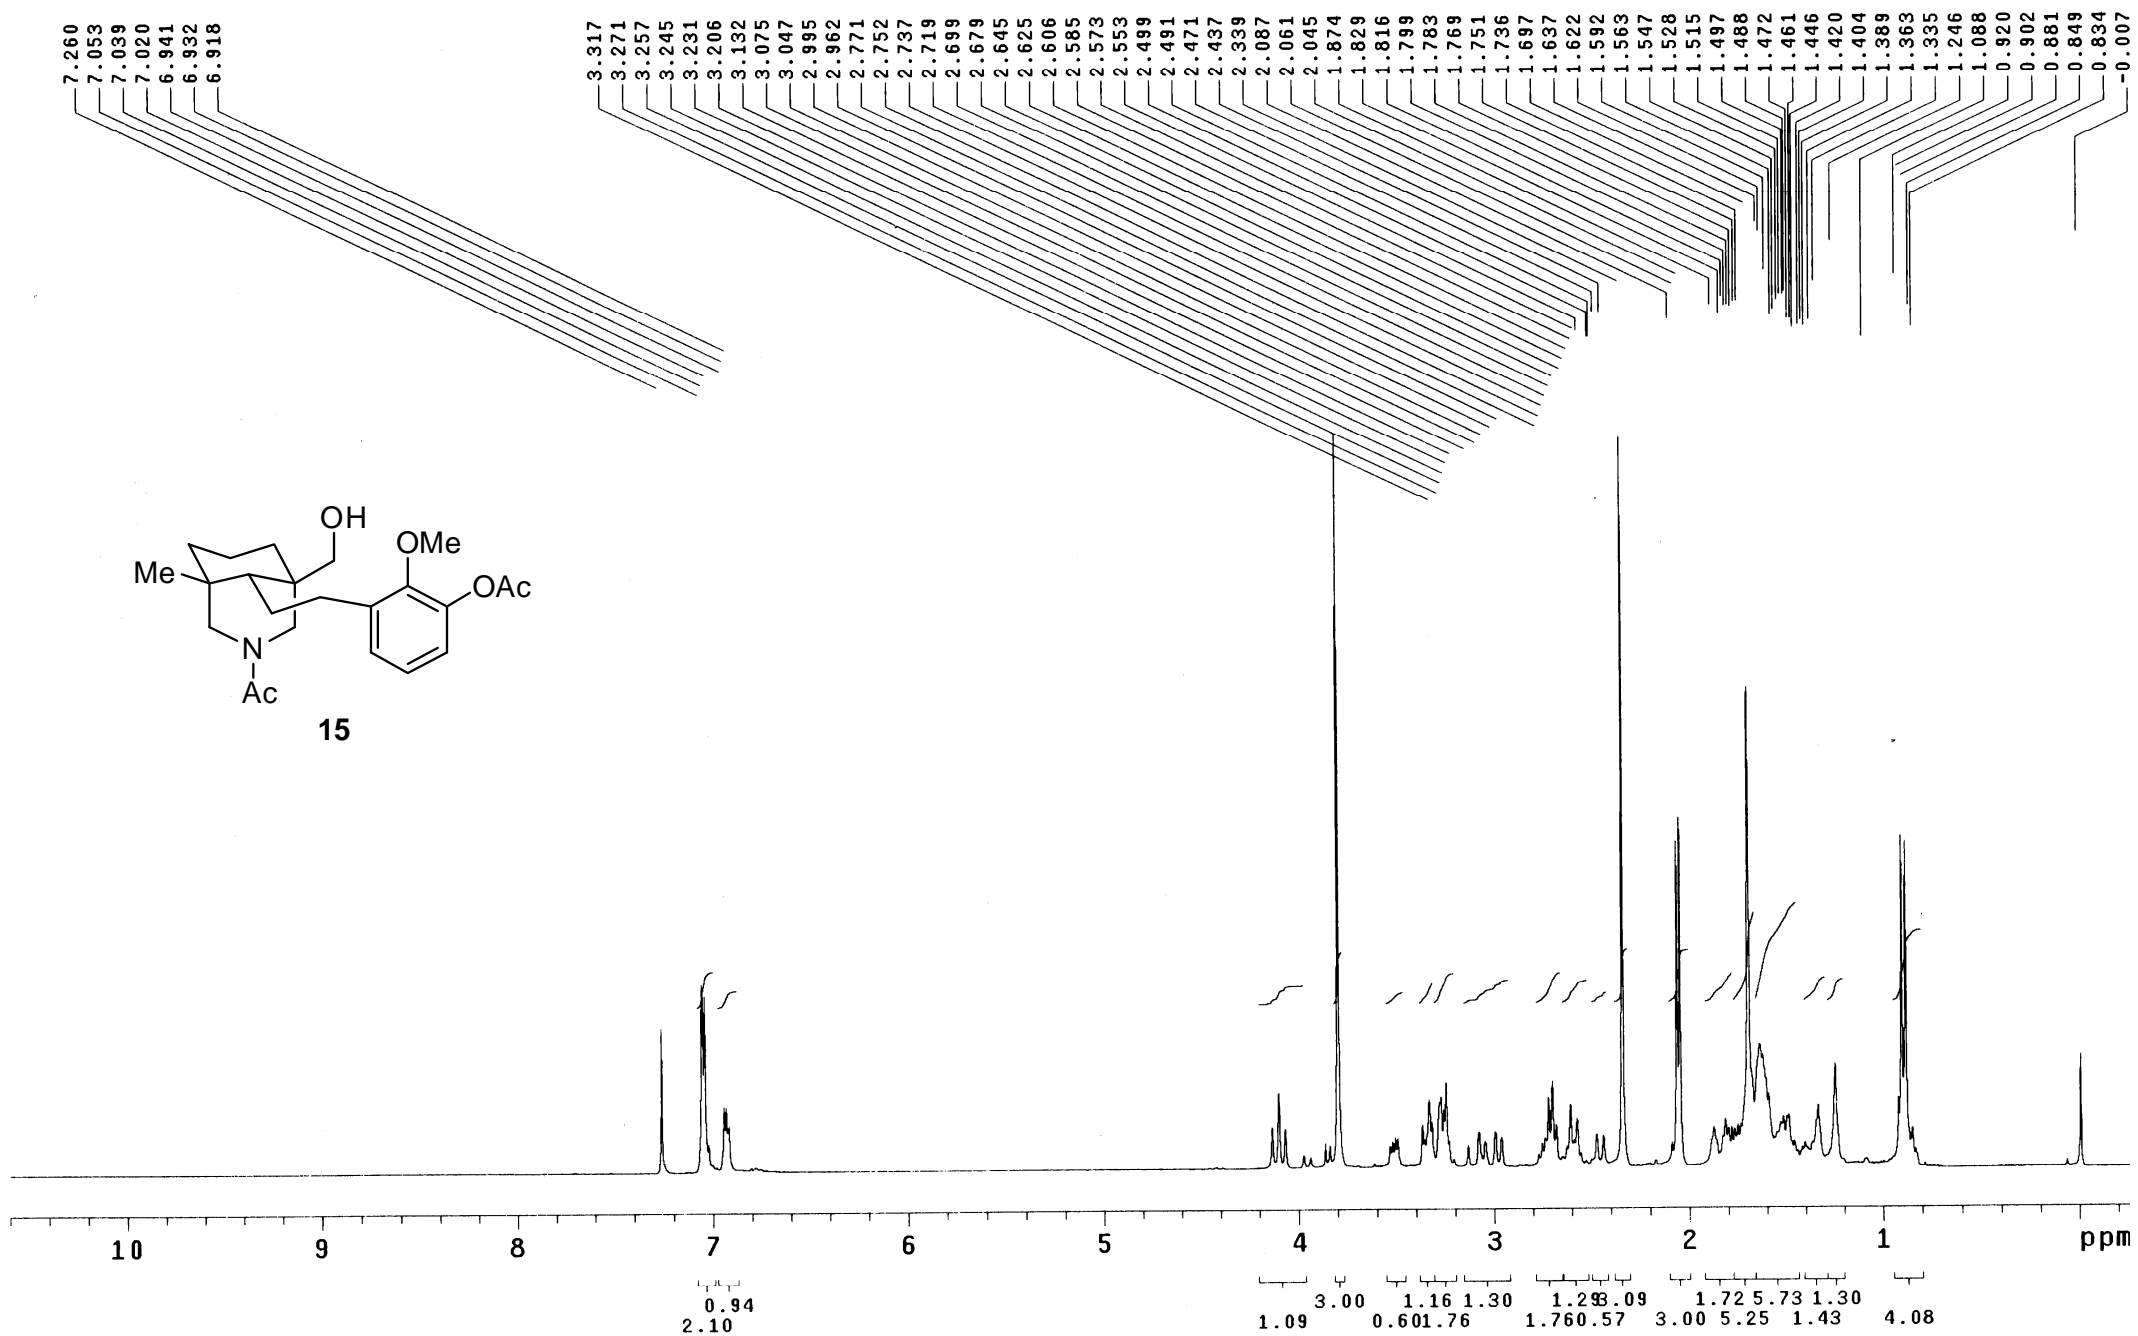

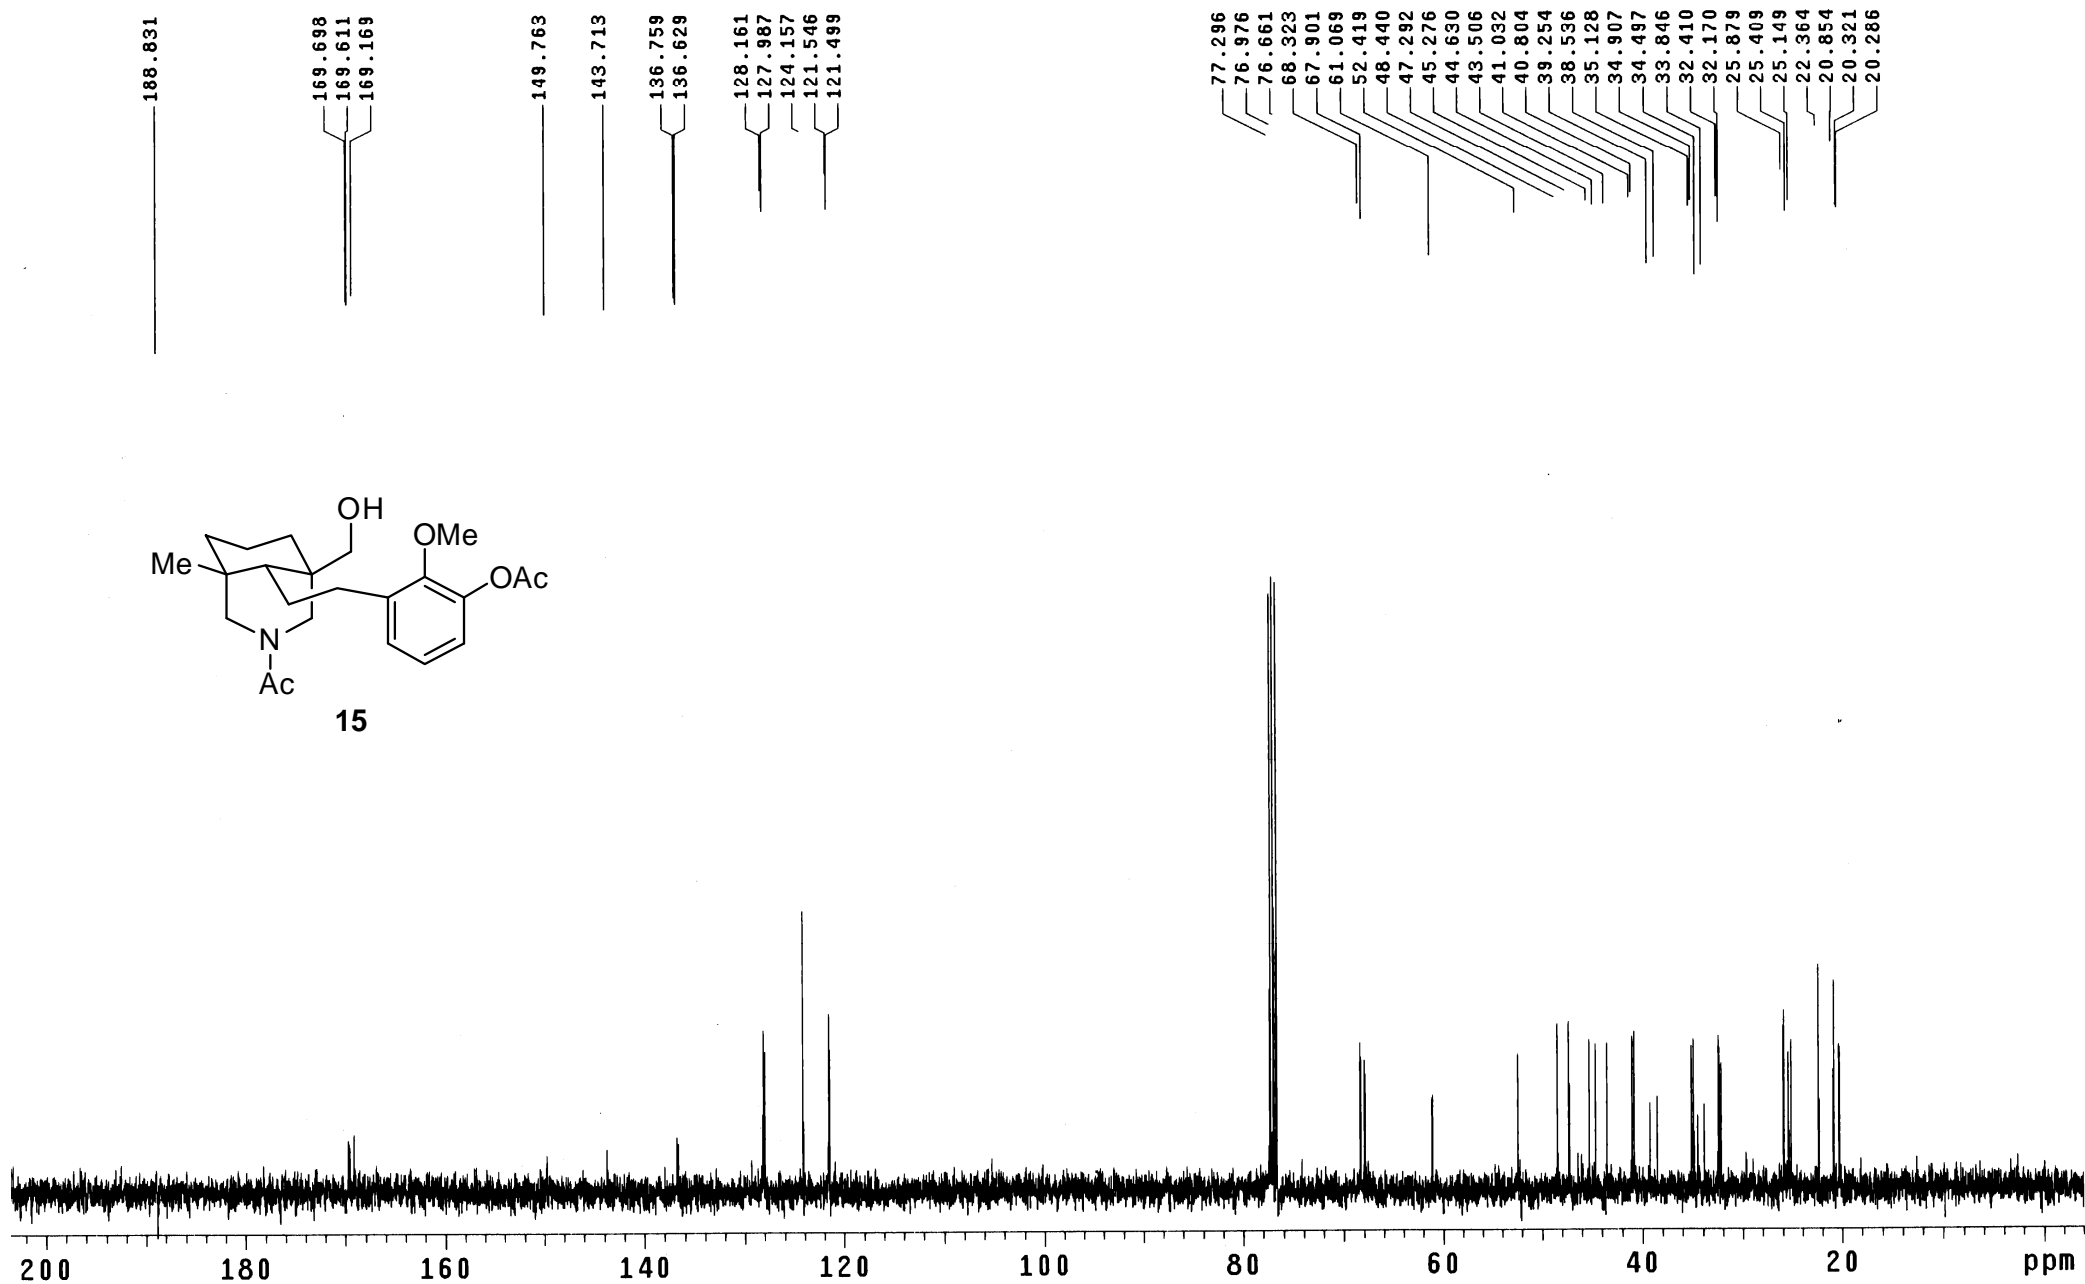

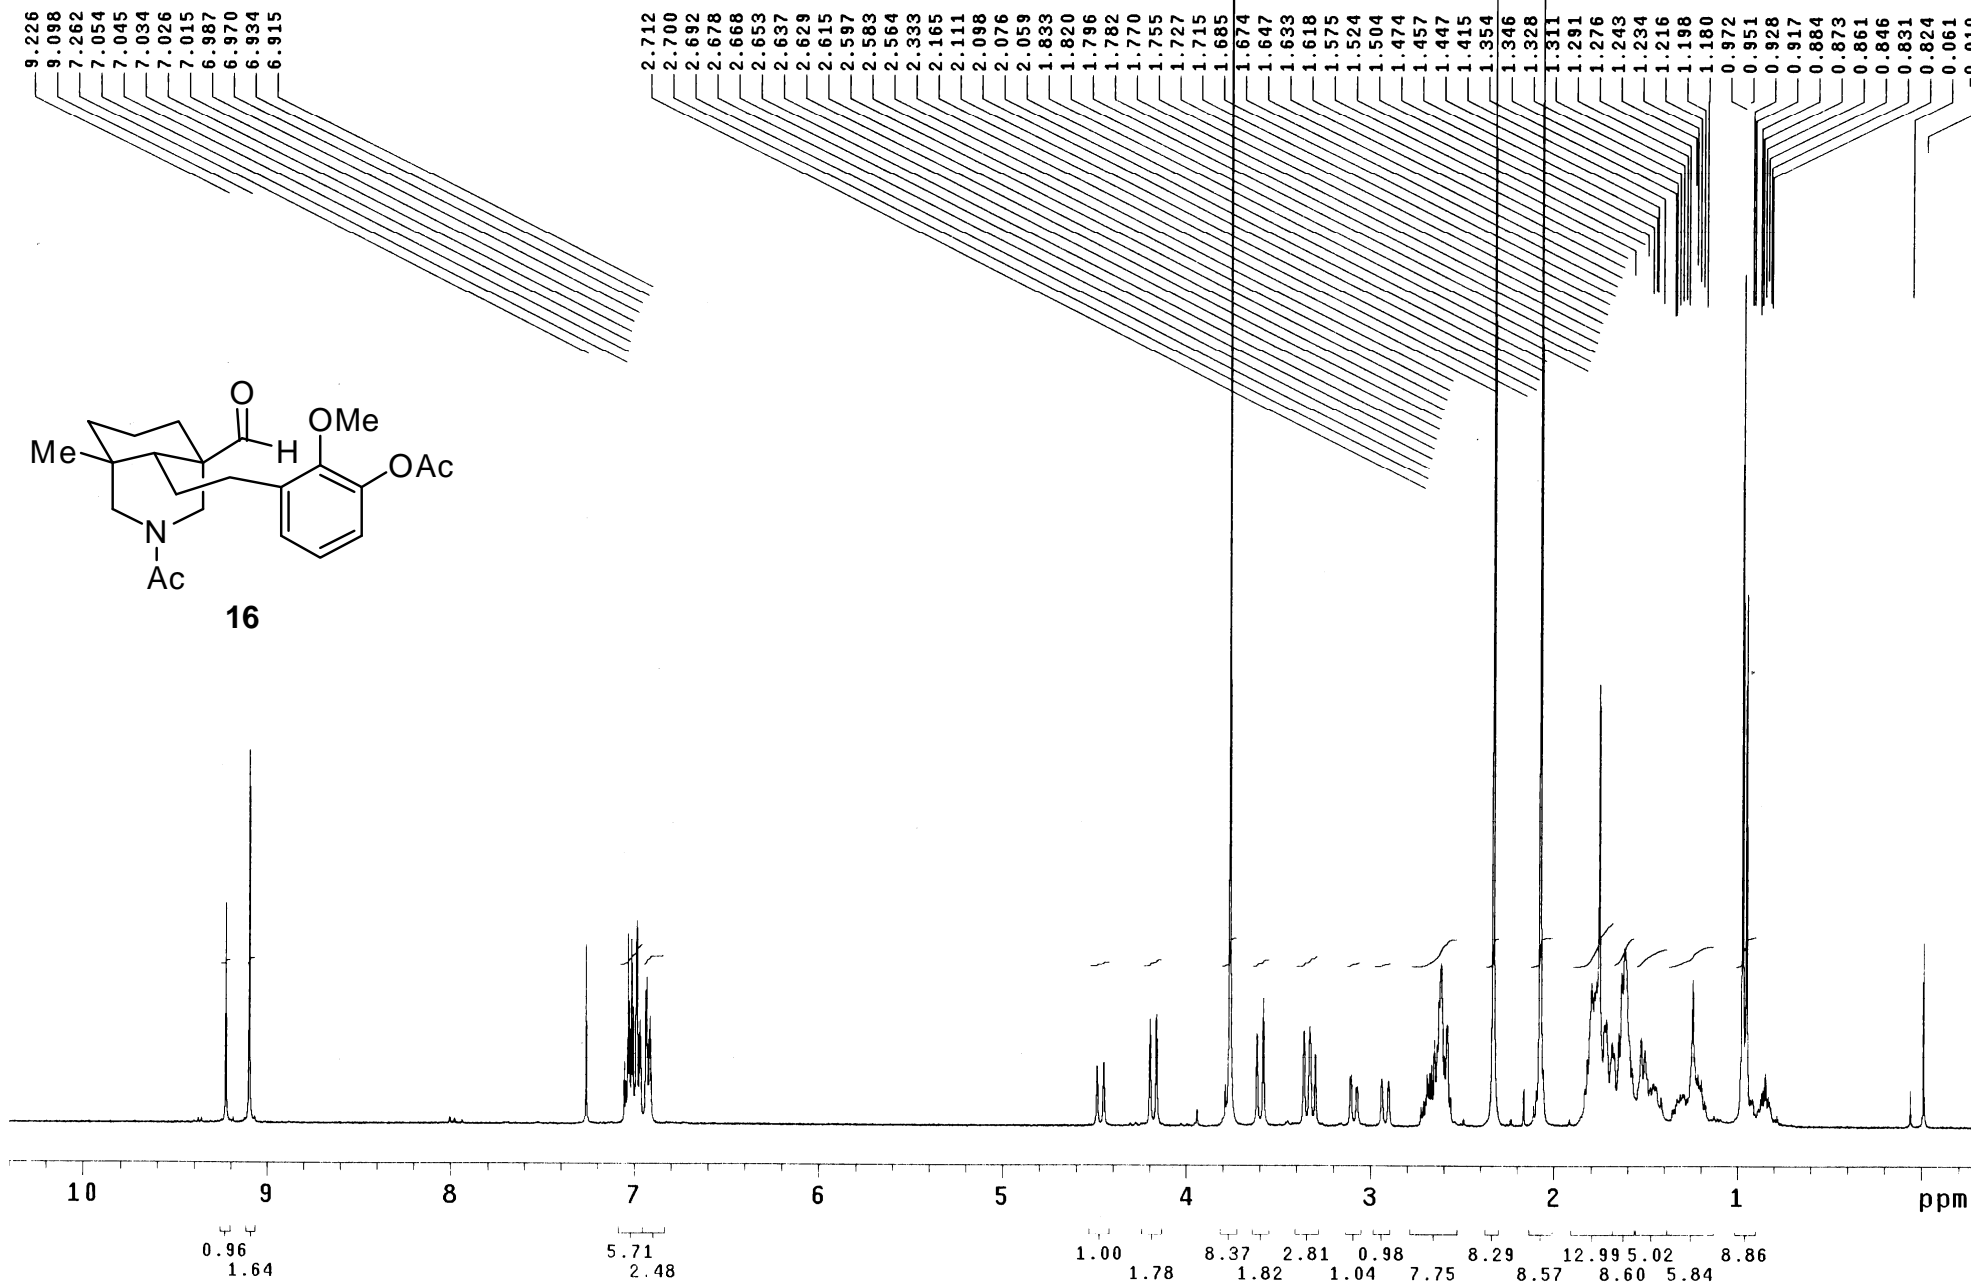

203.667  
203.470

169.964  
168.978

149.848

143.742

135.937  
135.810

127.792  
124.159  
121.820  
121.745

77.361  
77.041  
76.726  
61.063  
52.200  
50.840  
50.019  
47.105  
45.850  
43.961  
43.448  
40.908  
40.399  
40.206  
33.761  
33.008  
32.128  
31.974  
31.631  
31.481  
29.695  
28.298  
27.991  
25.510  
25.415  
22.410  
20.907  
19.483  
19.384

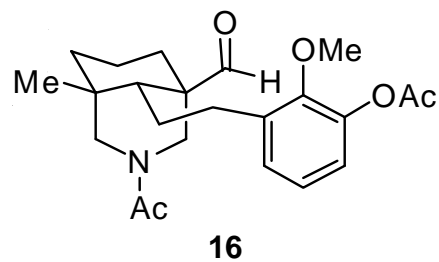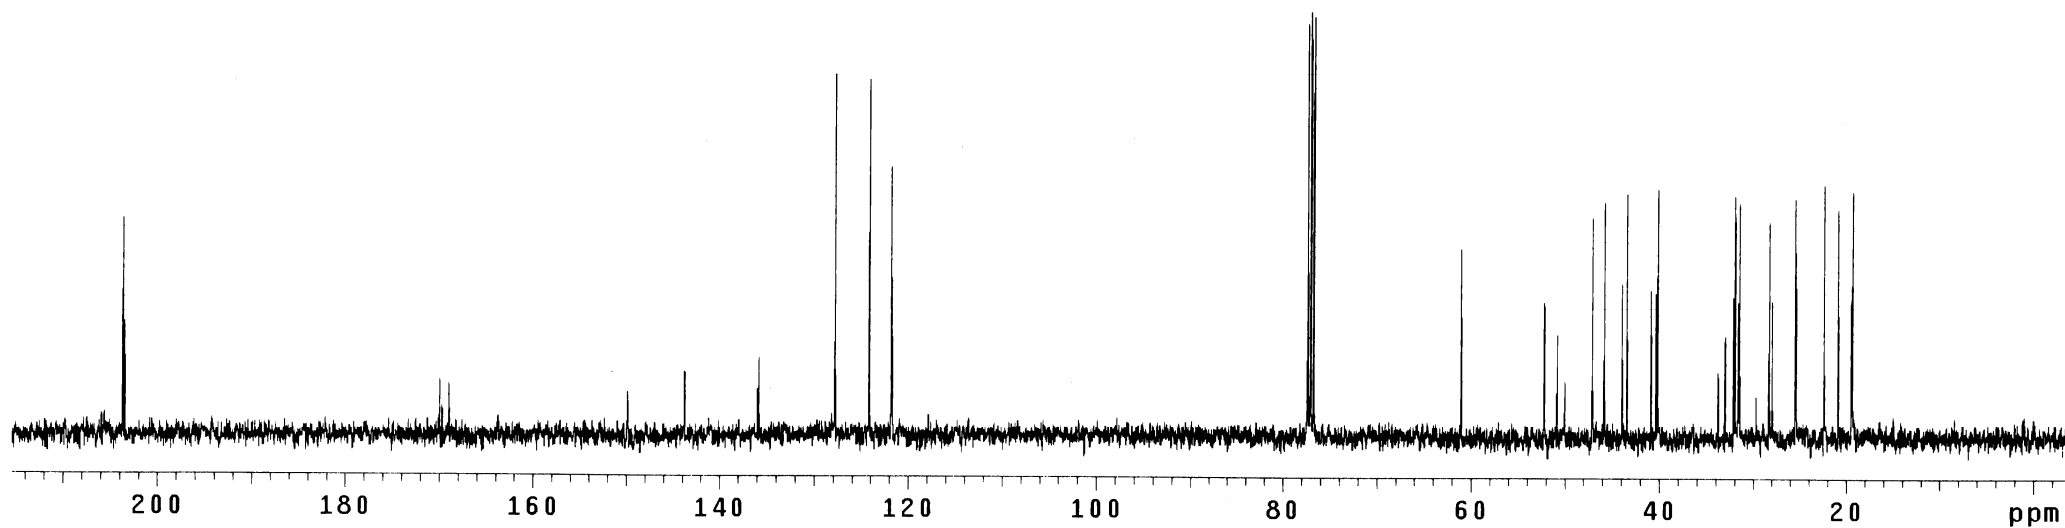

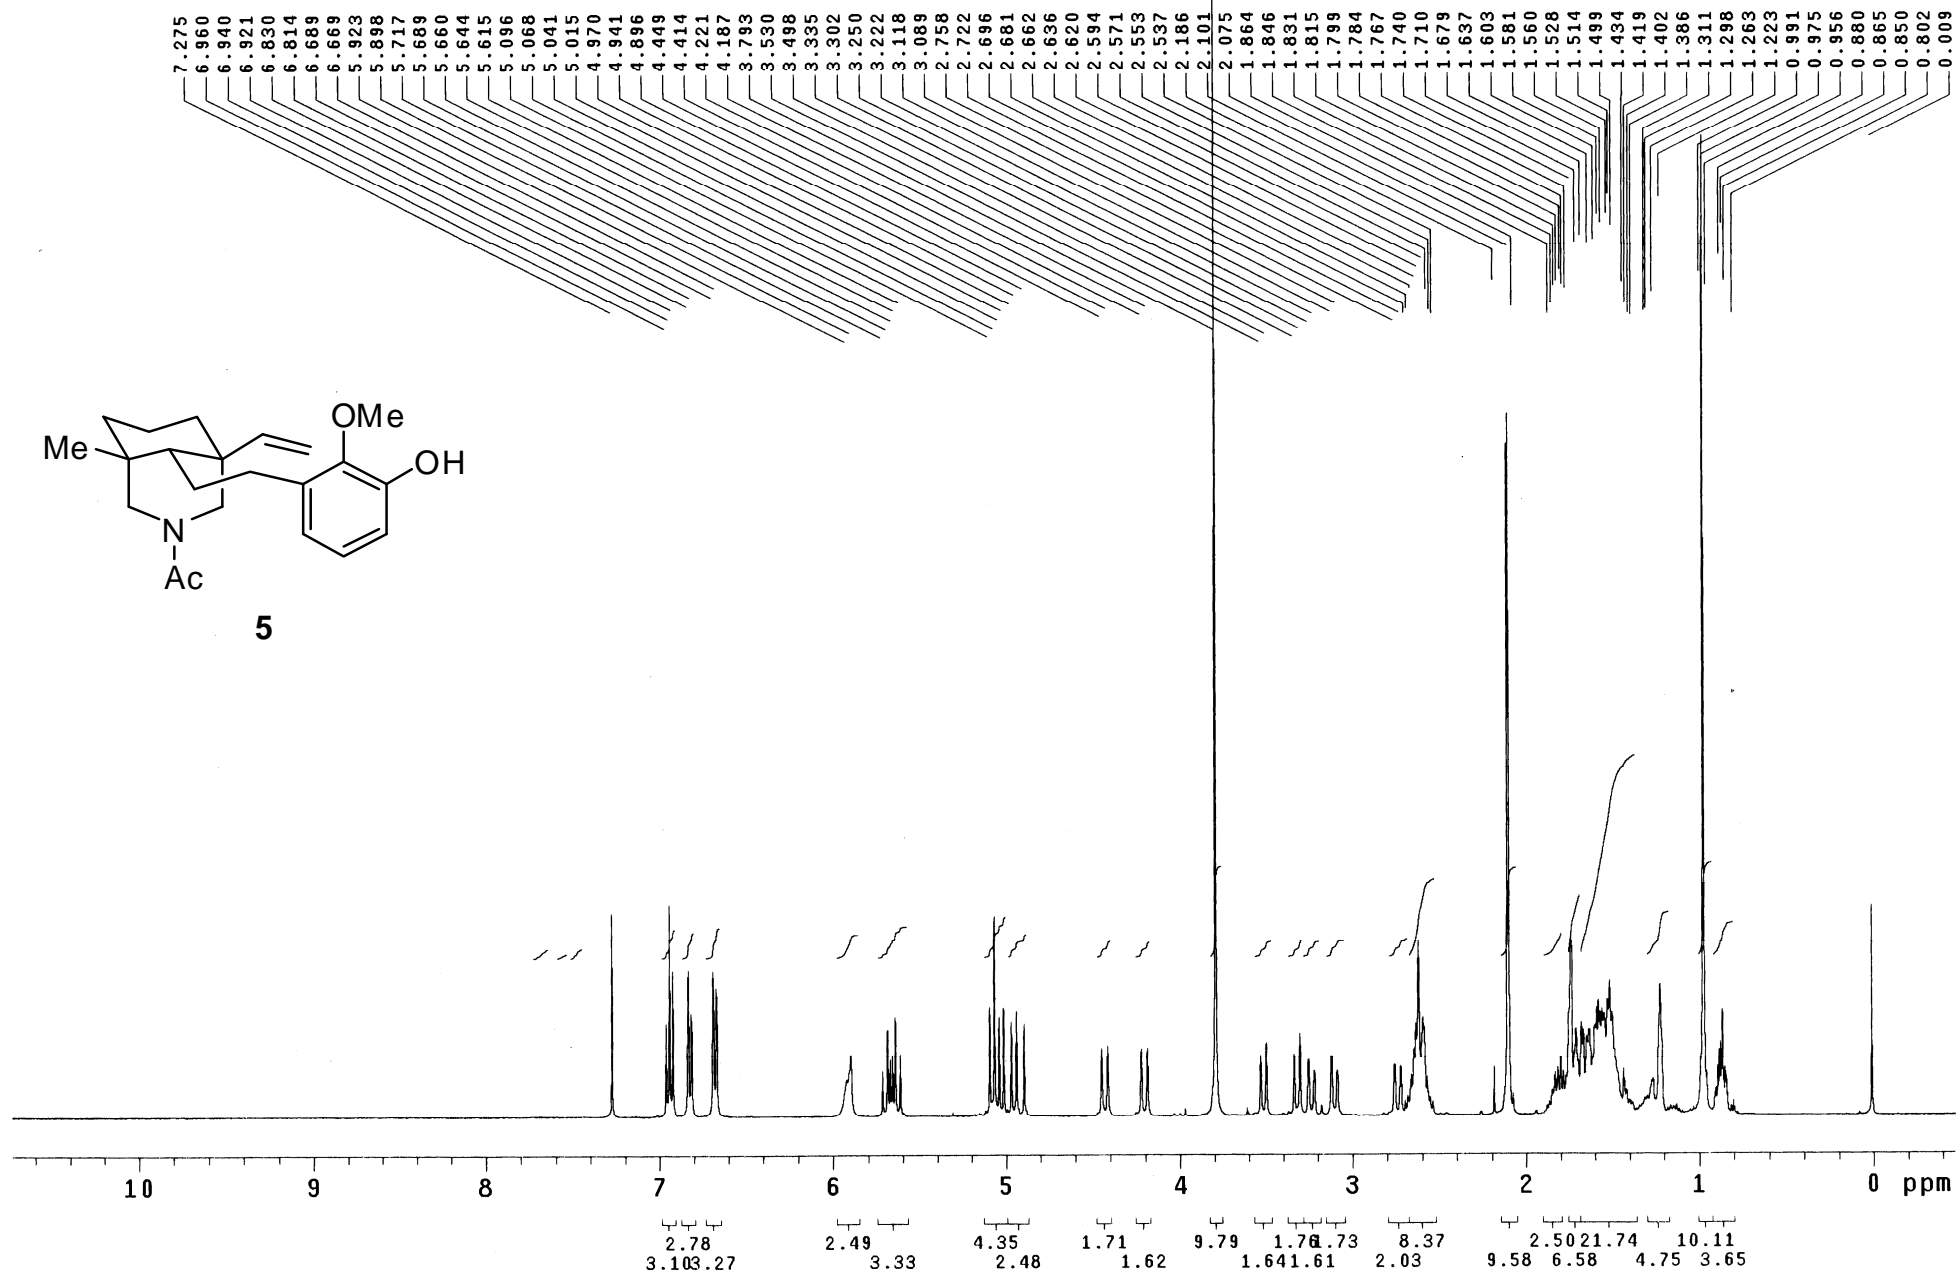

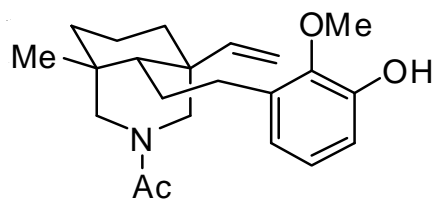

5

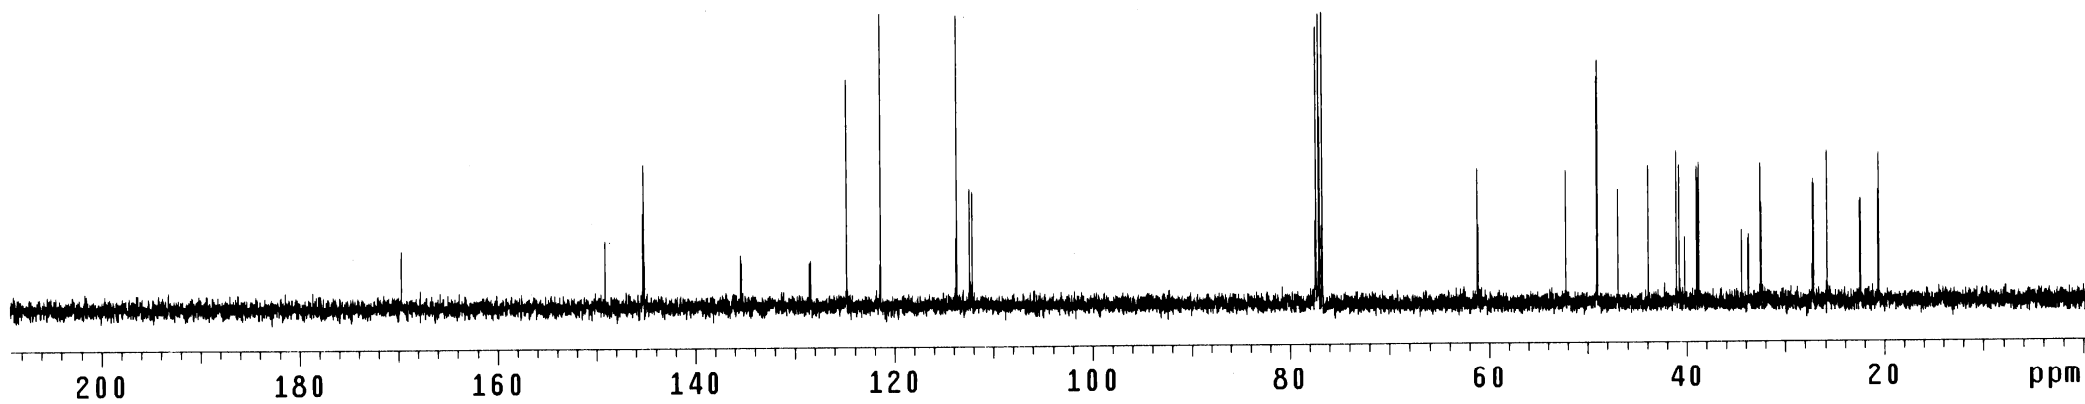

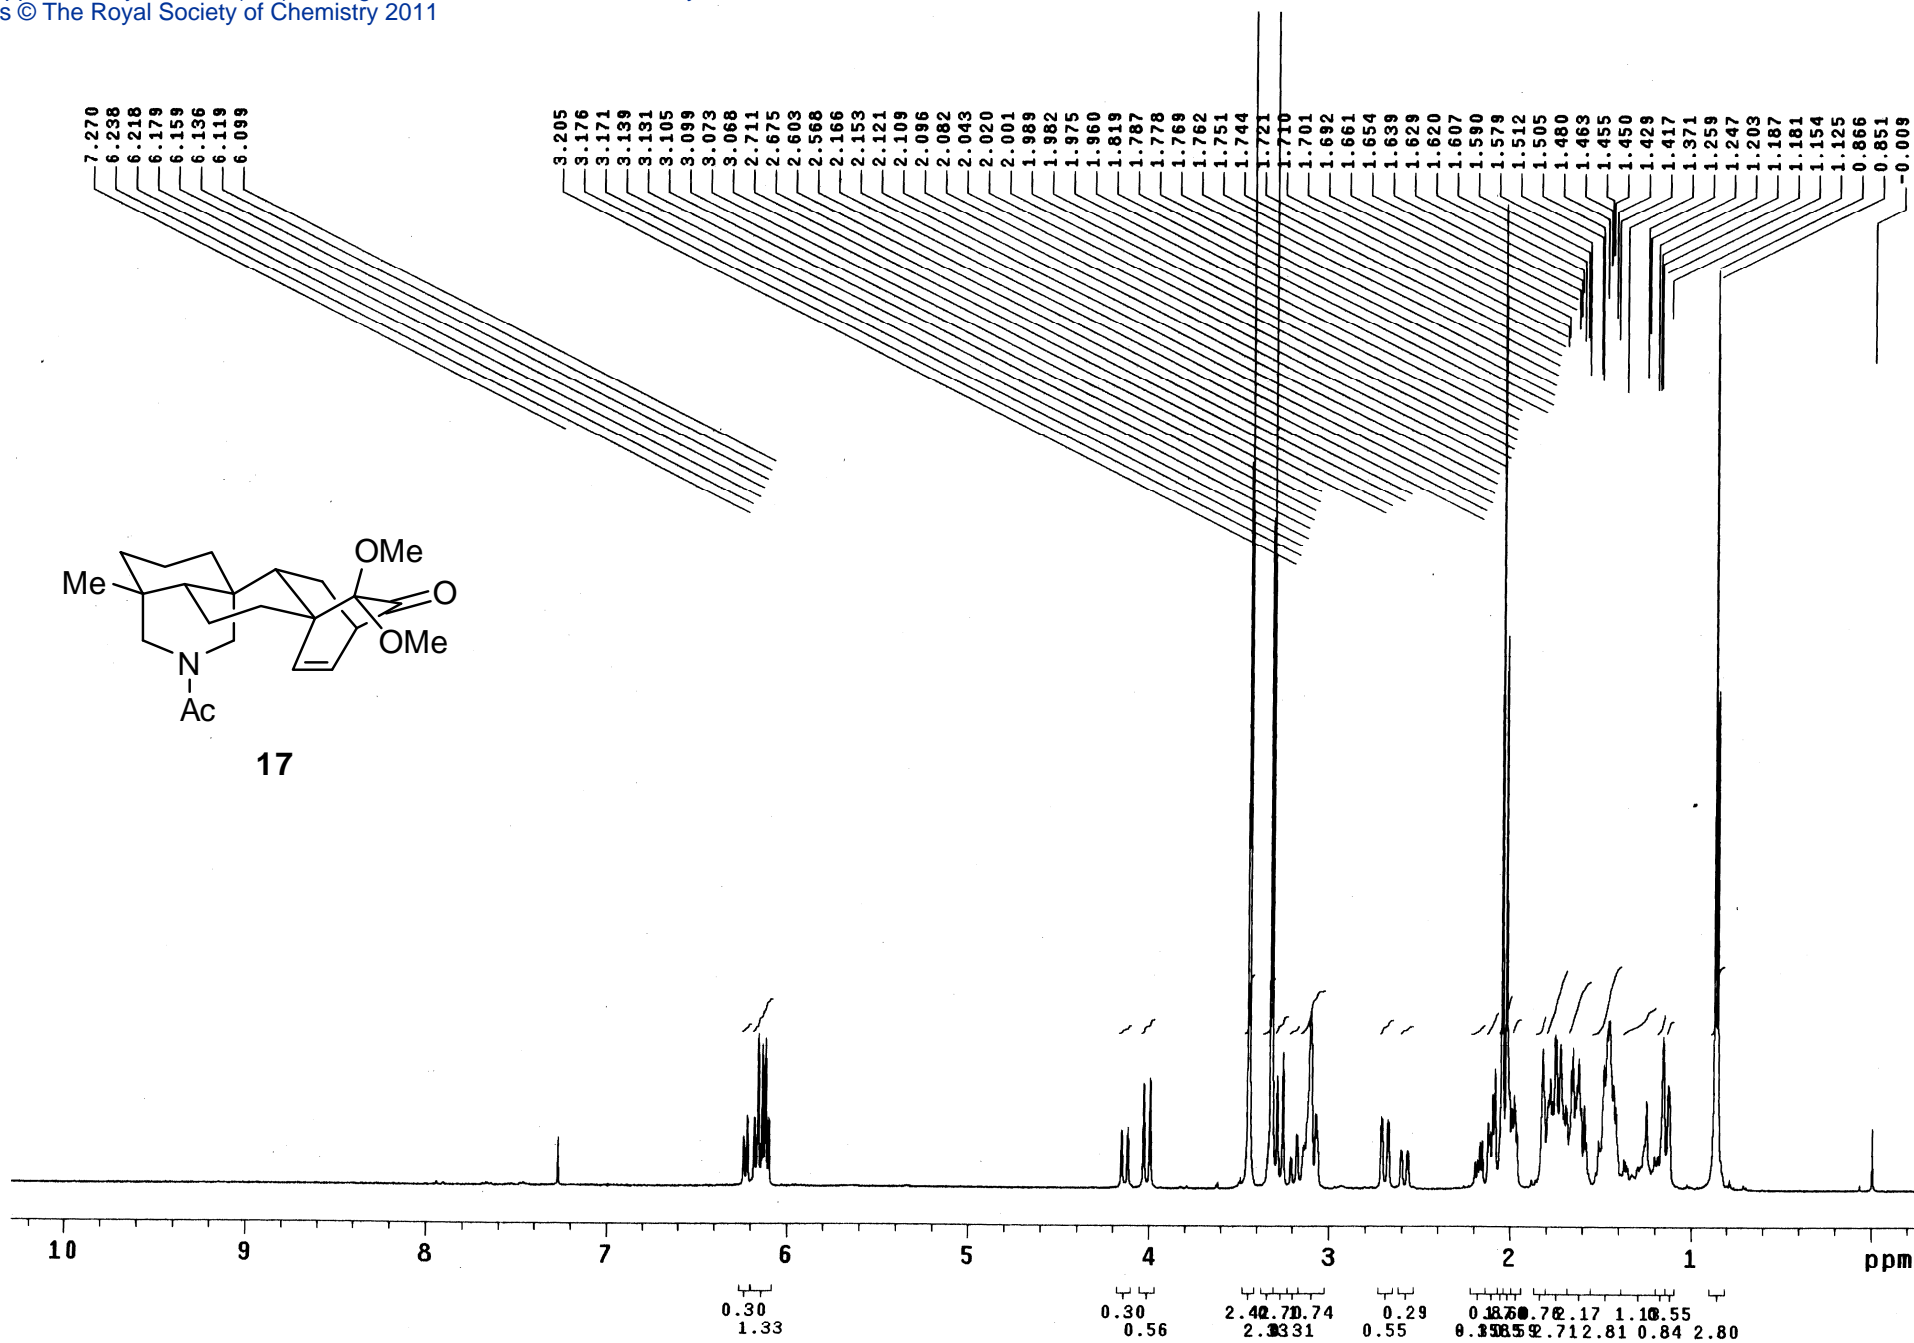

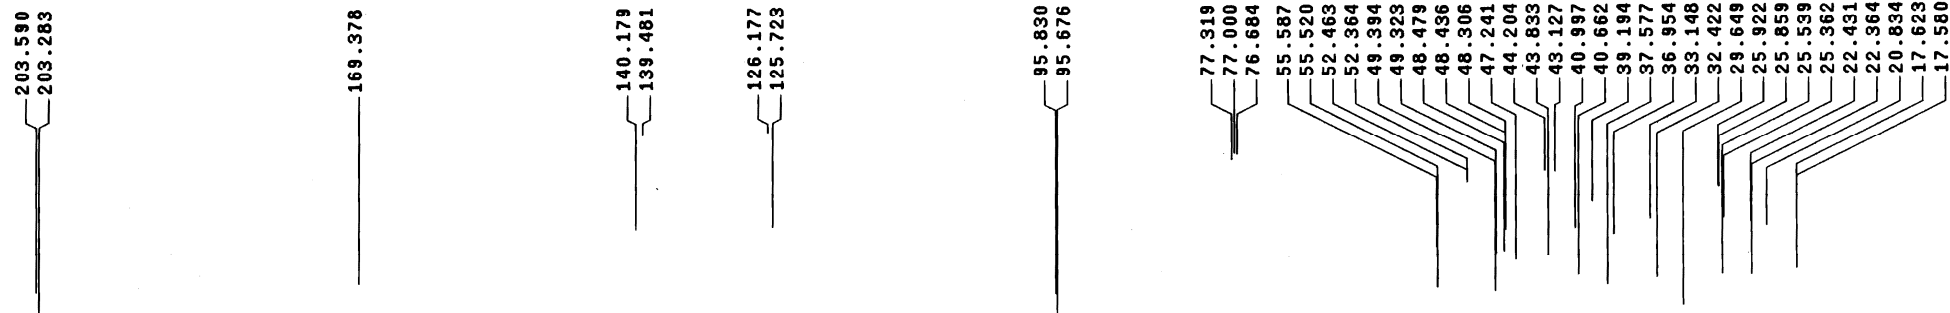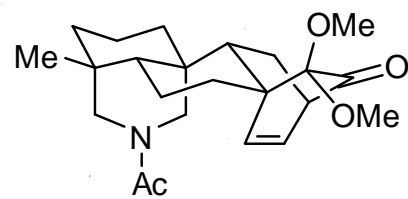

17

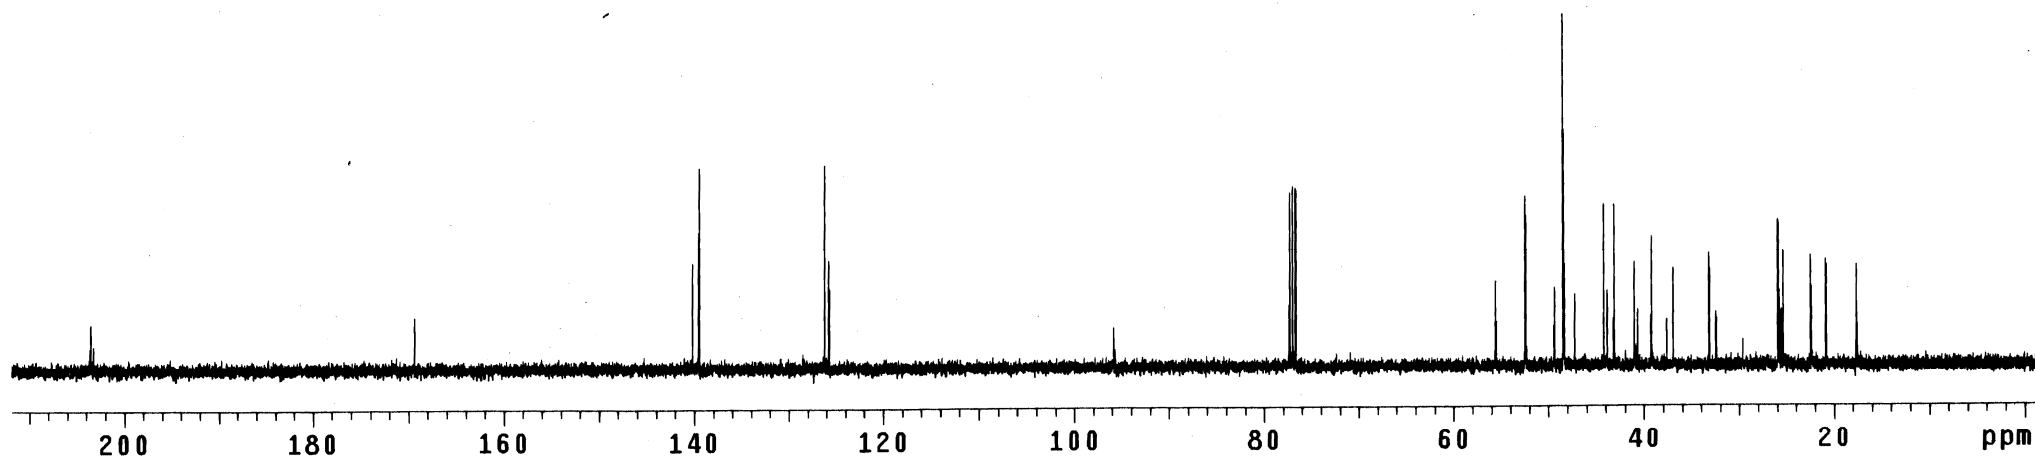



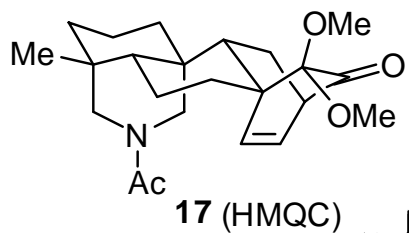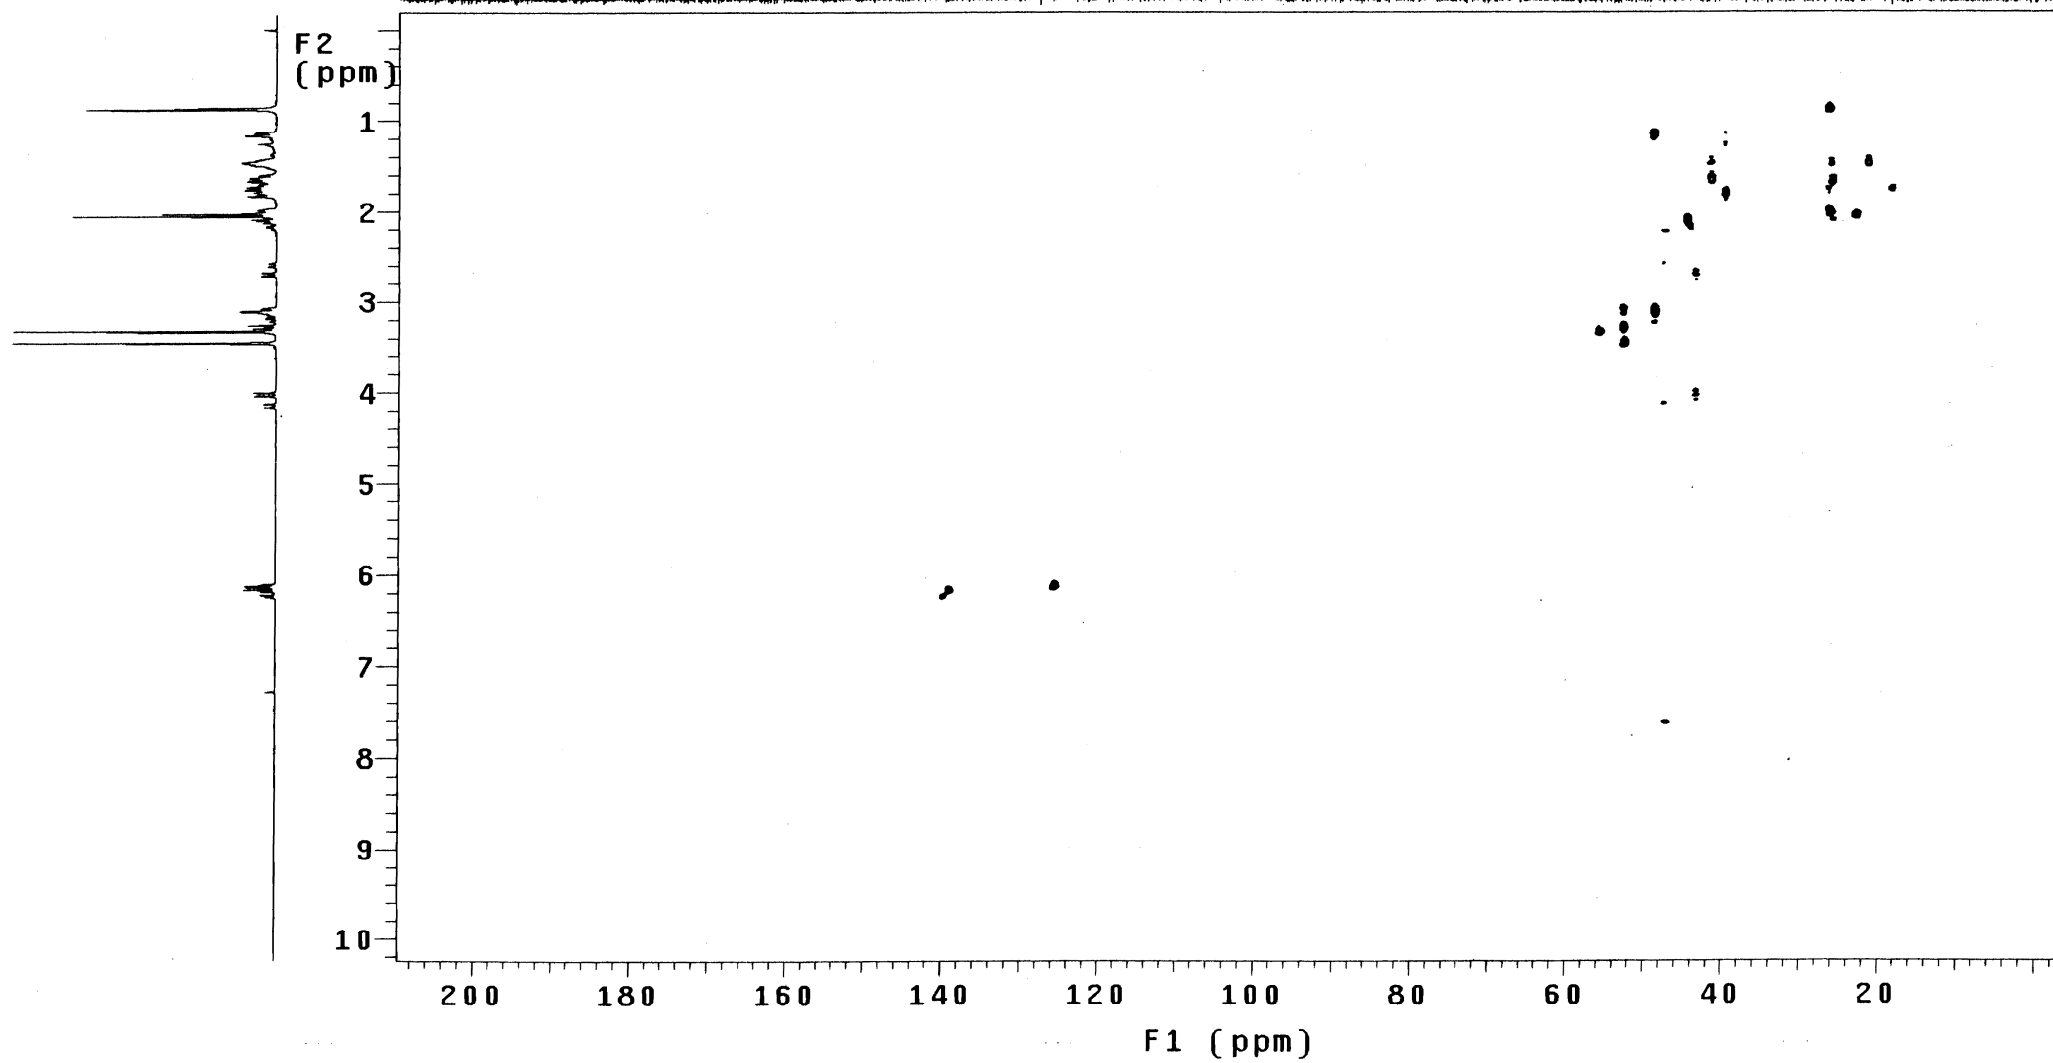

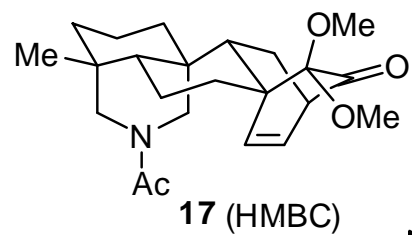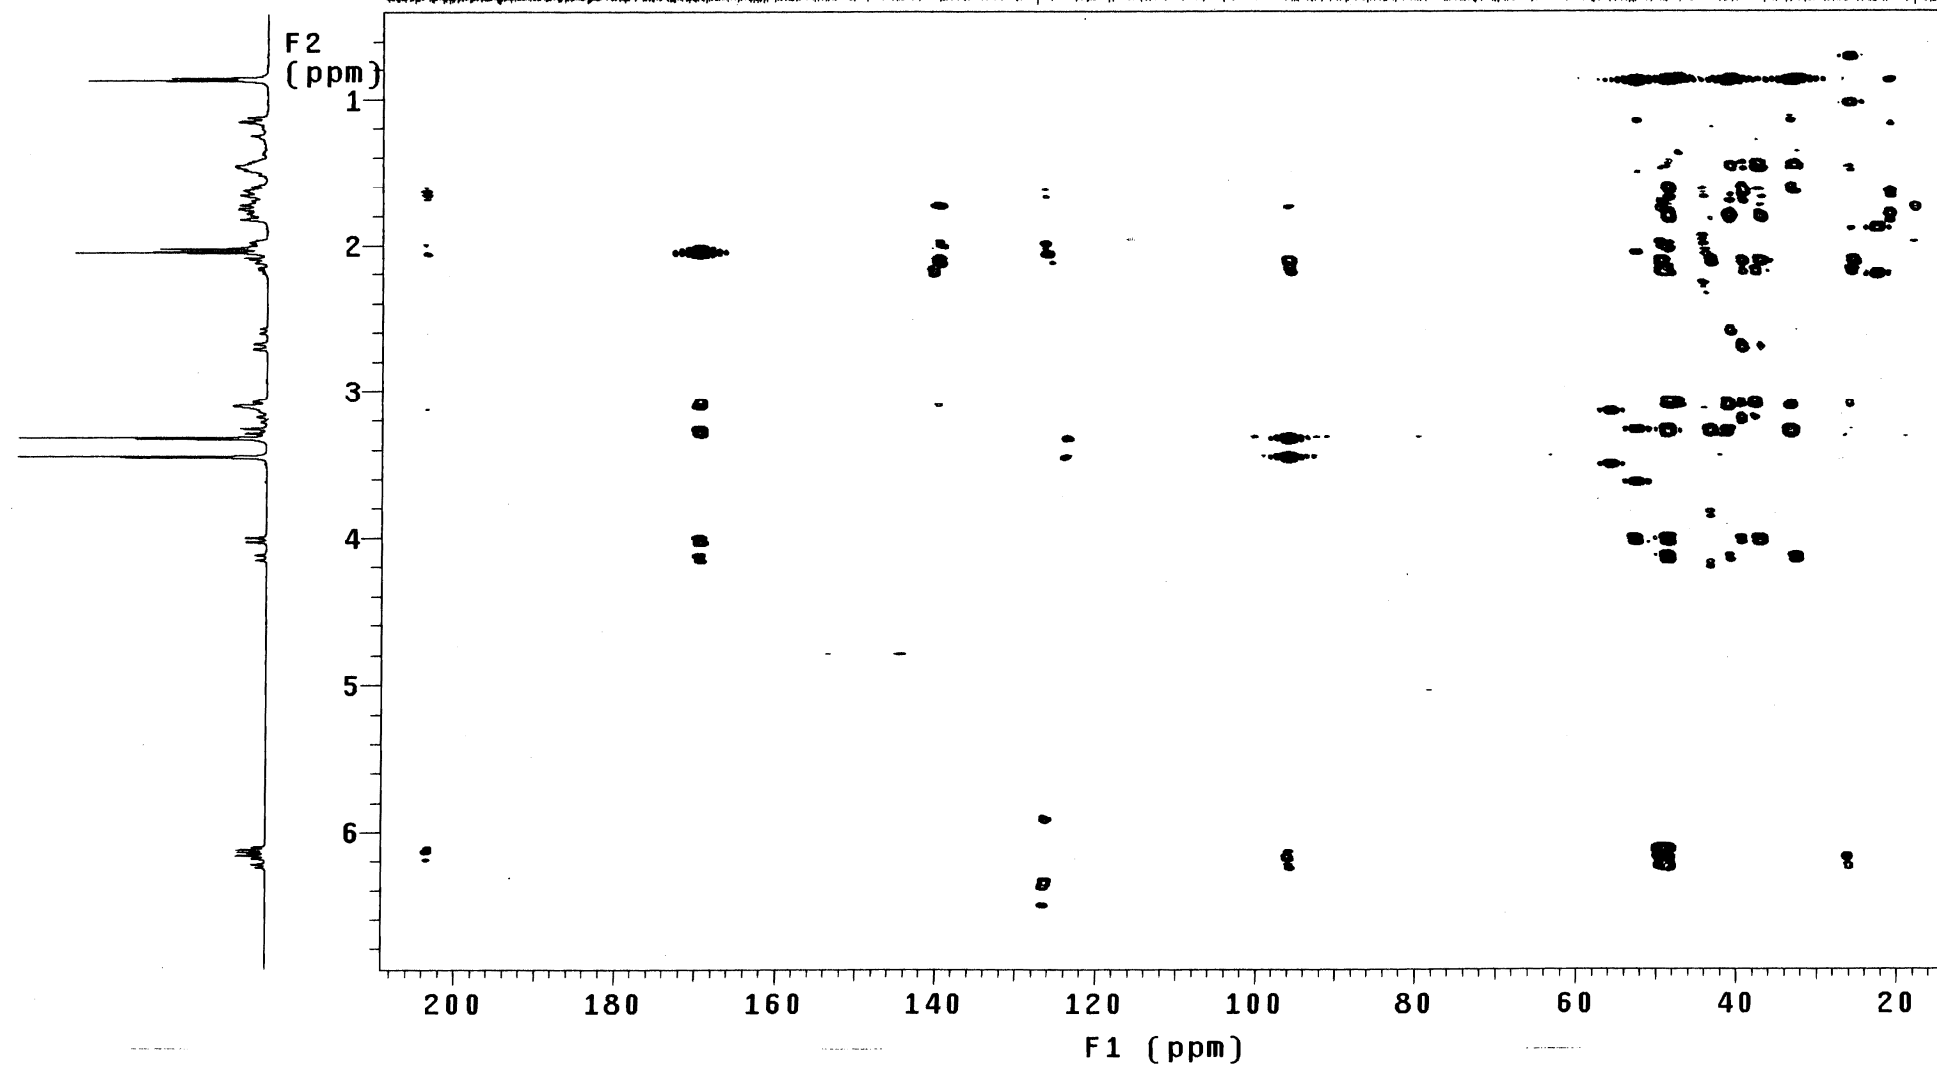

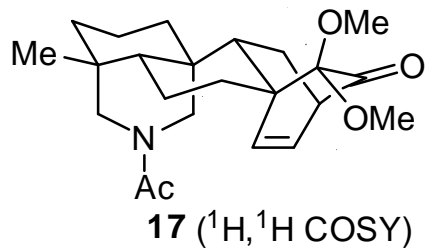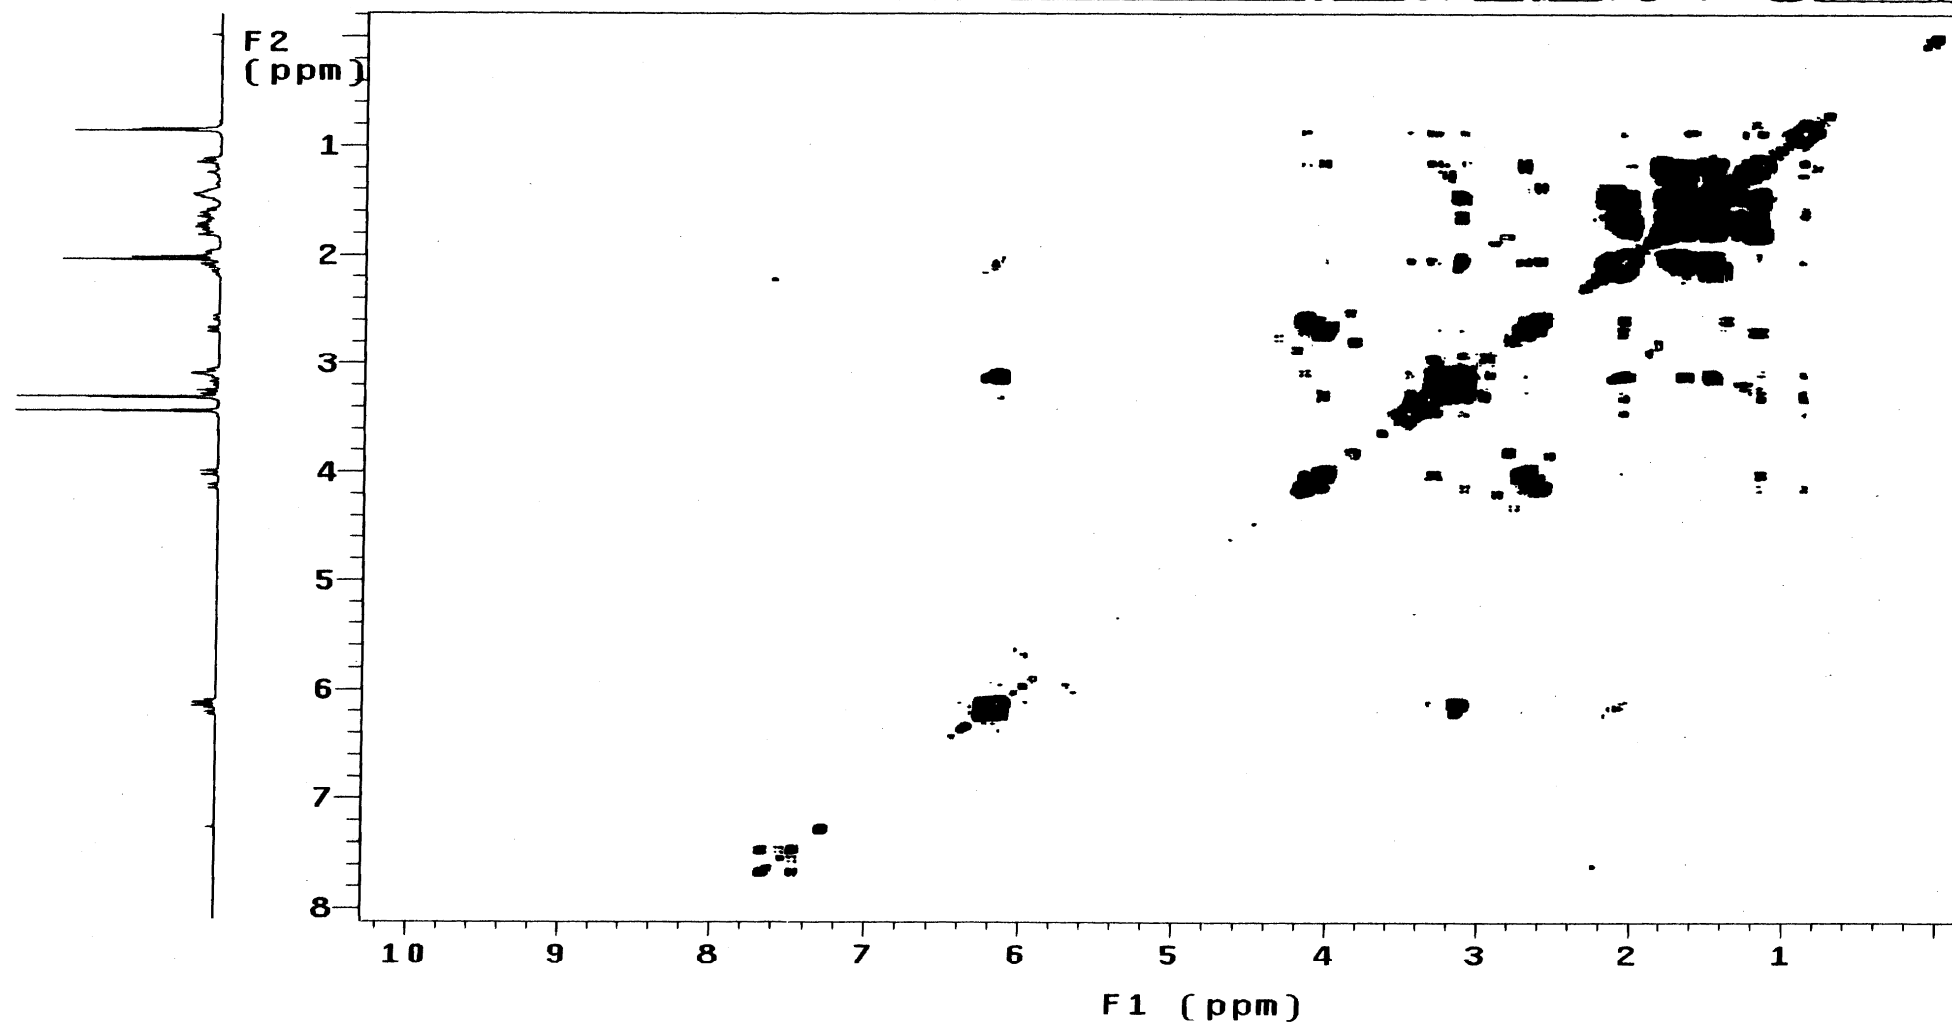

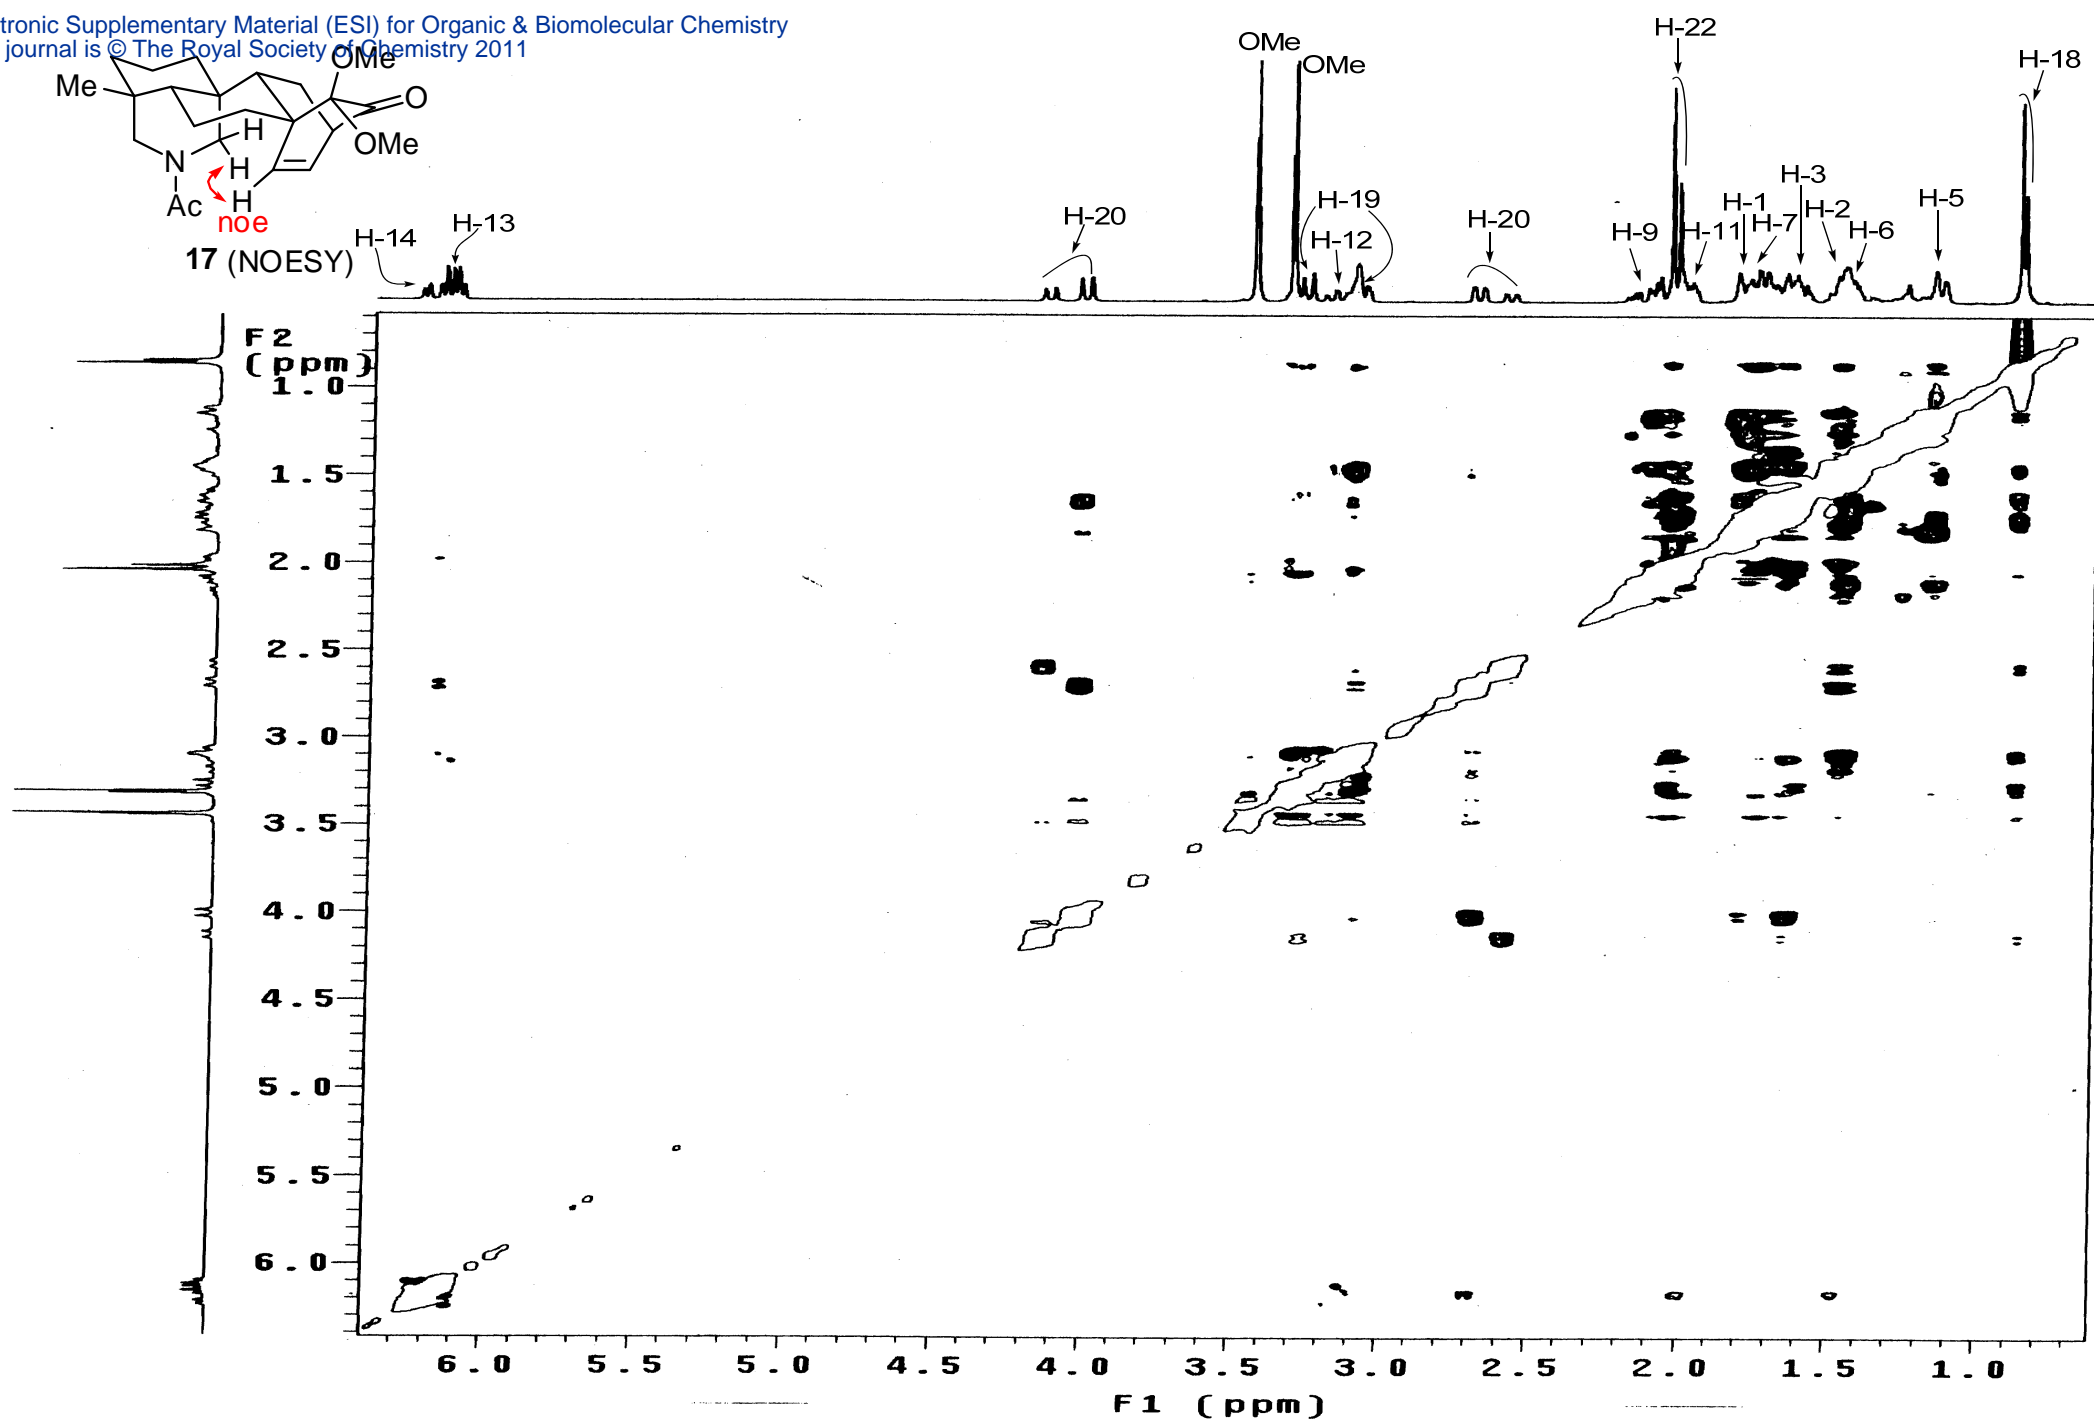

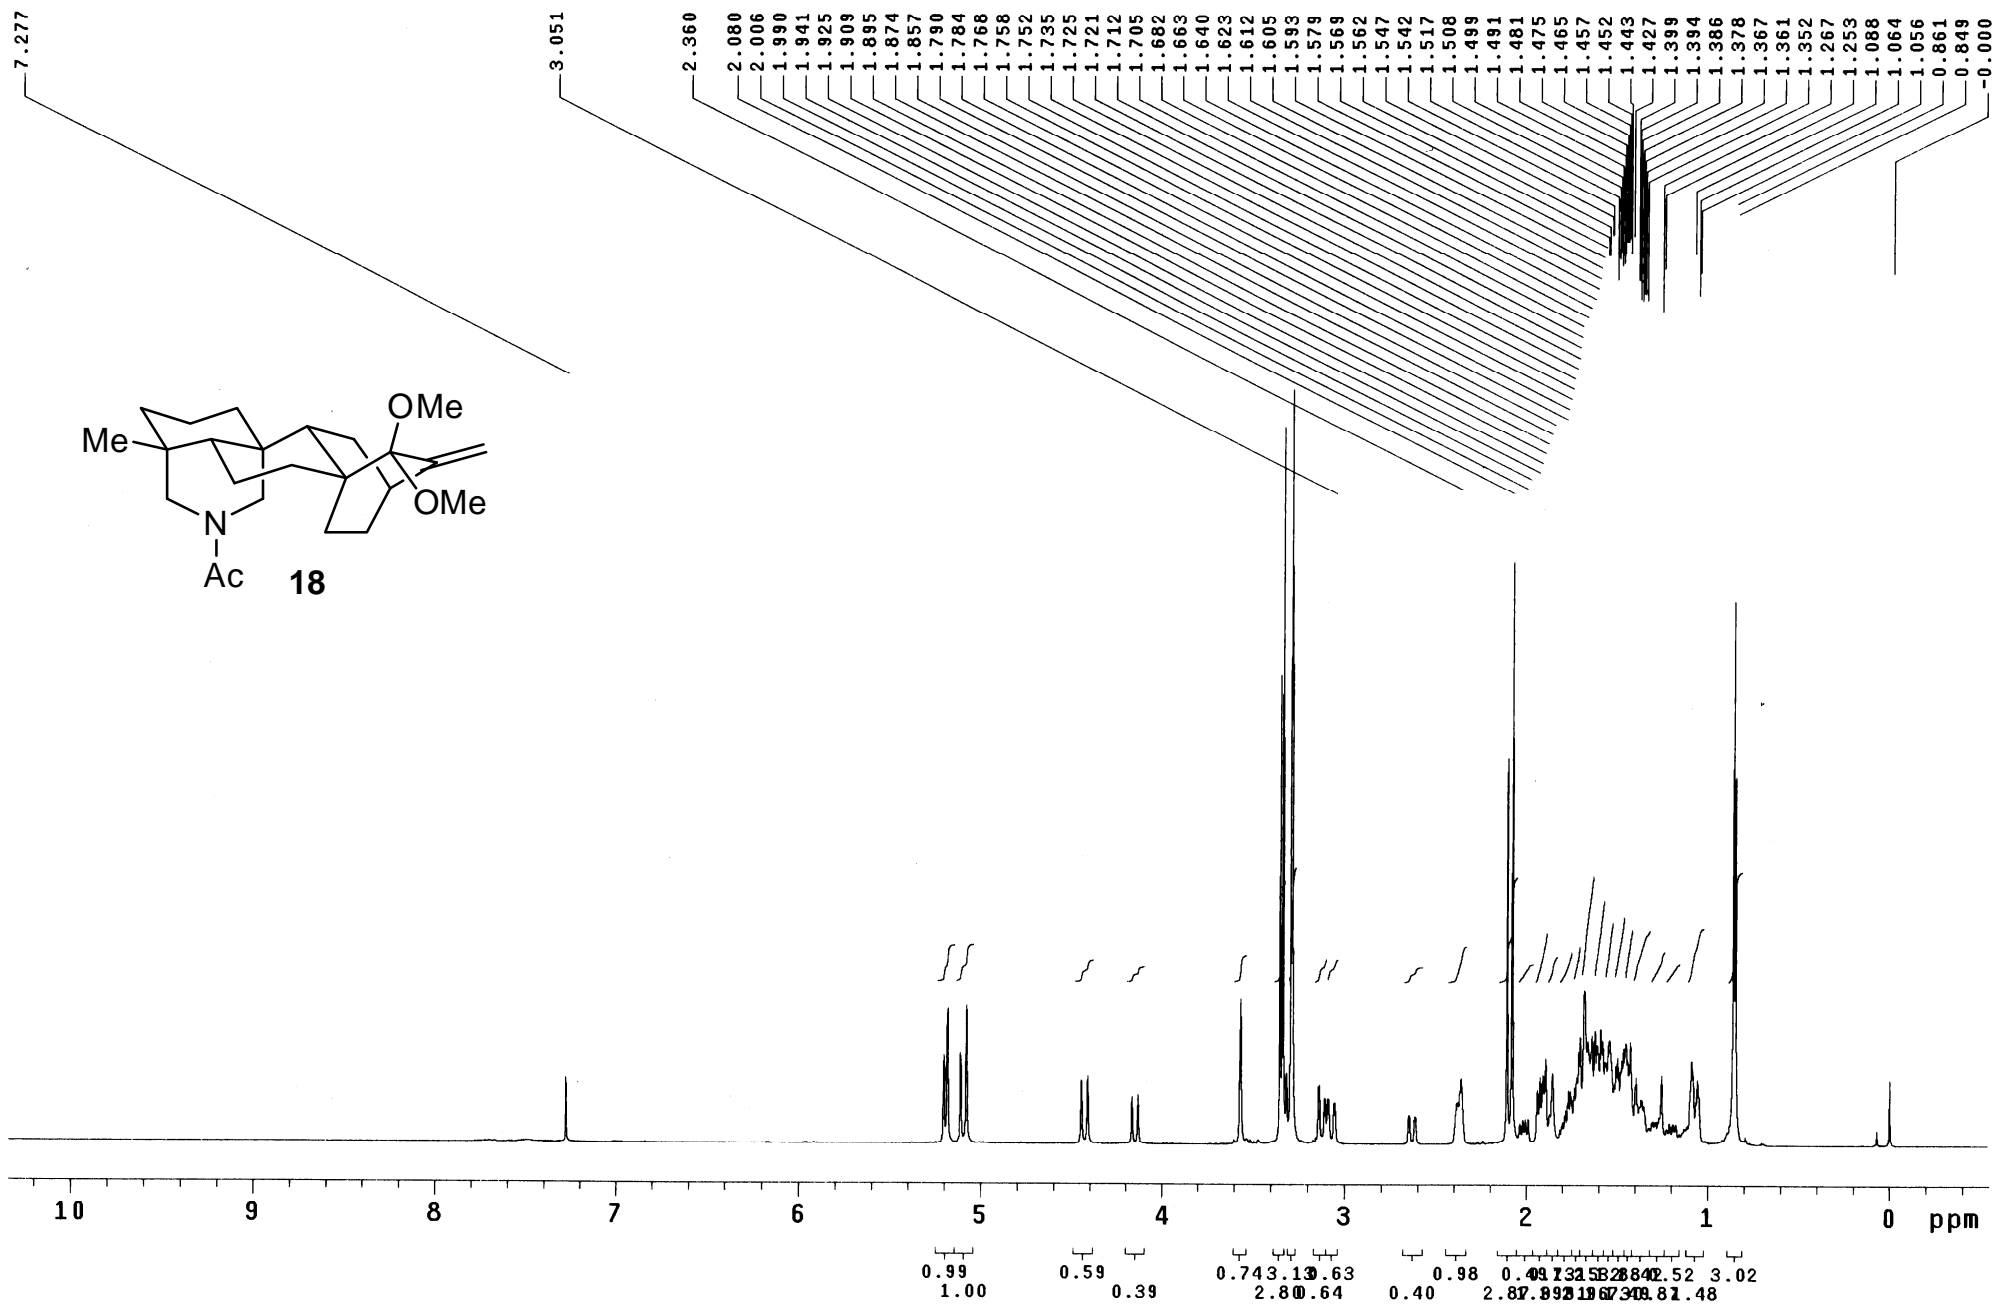

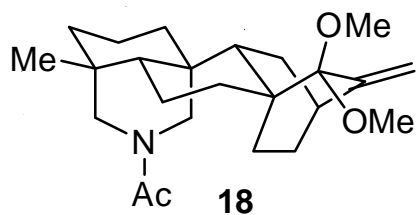

169.514  
169.389

149.697  
149.291

112.613  
112.230

102.320  
102.153

77.319  
77.000  
76.681  
52.560  
51.817  
51.256  
51.172  
49.098  
47.361  
46.814  
44.254  
44.198  
42.309  
42.096  
41.914  
41.057  
40.761  
40.037  
39.988  
37.693  
37.409  
37.060  
33.161  
32.425  
29.634  
29.509  
27.931  
27.313  
26.649  
26.406  
25.909  
23.842  
22.492  
20.987  
17.623

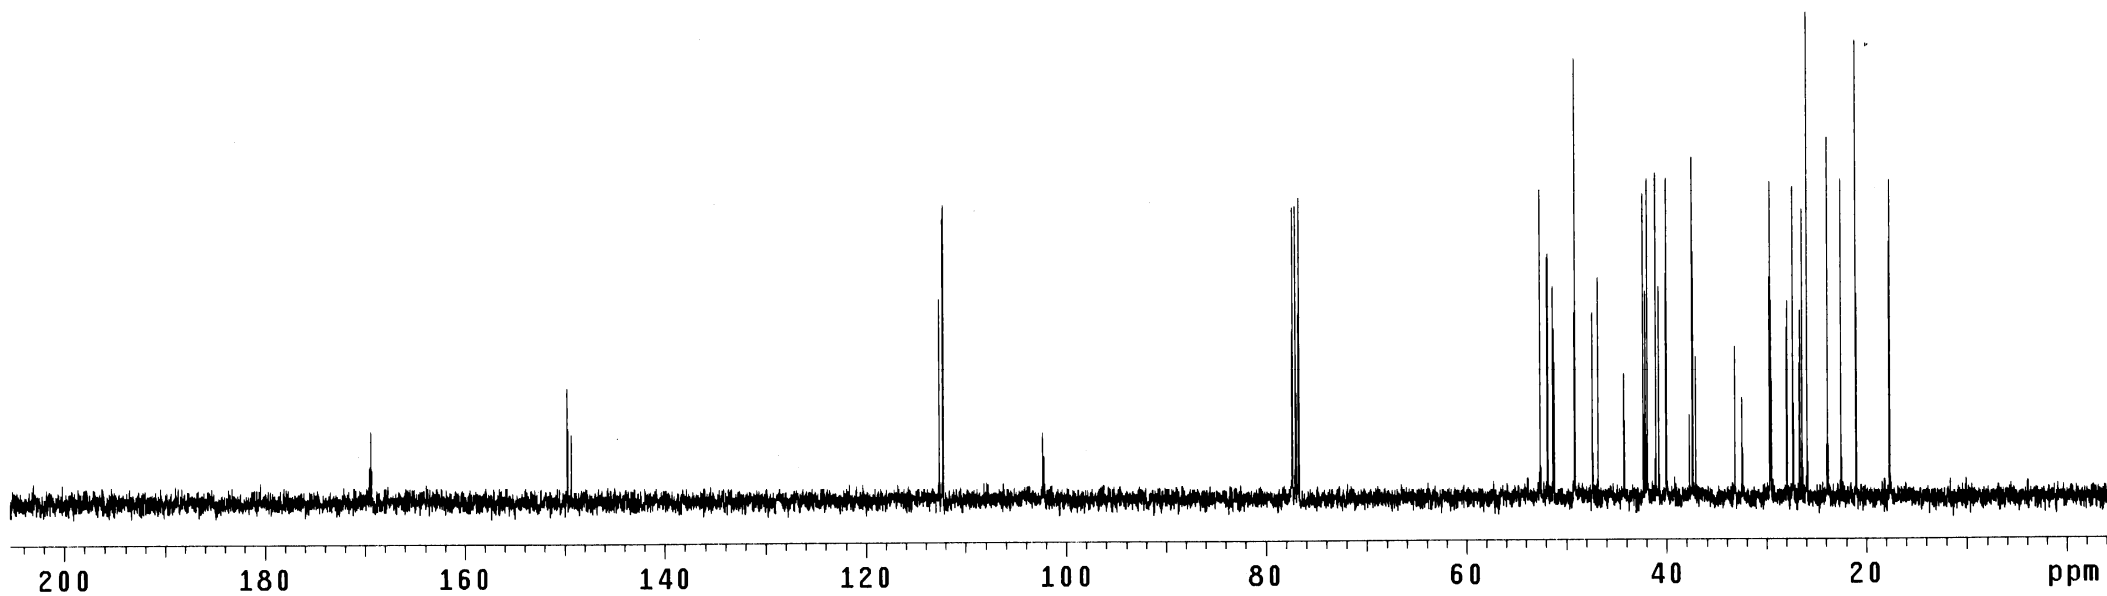

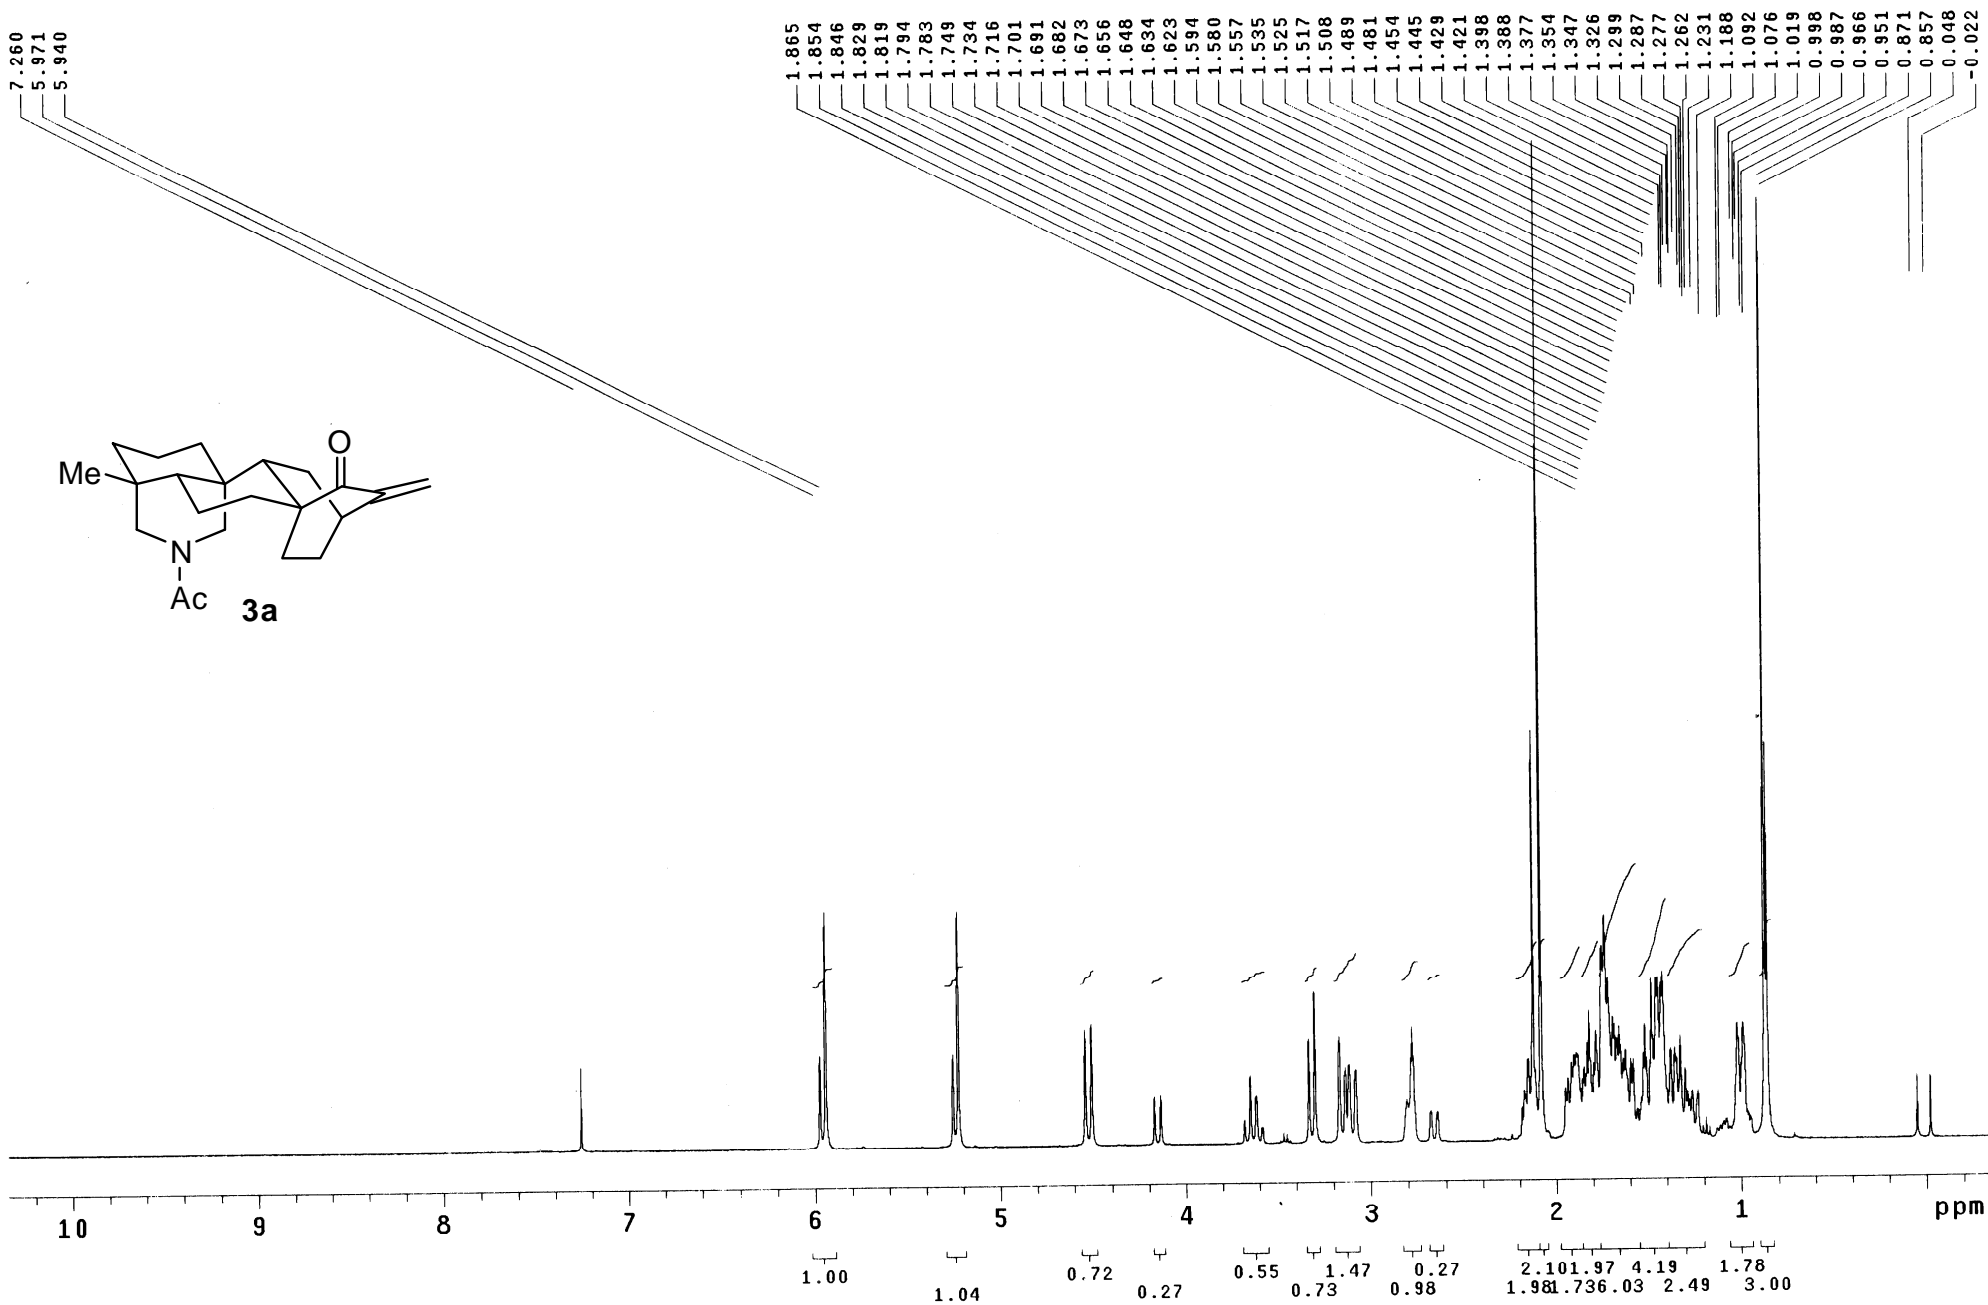

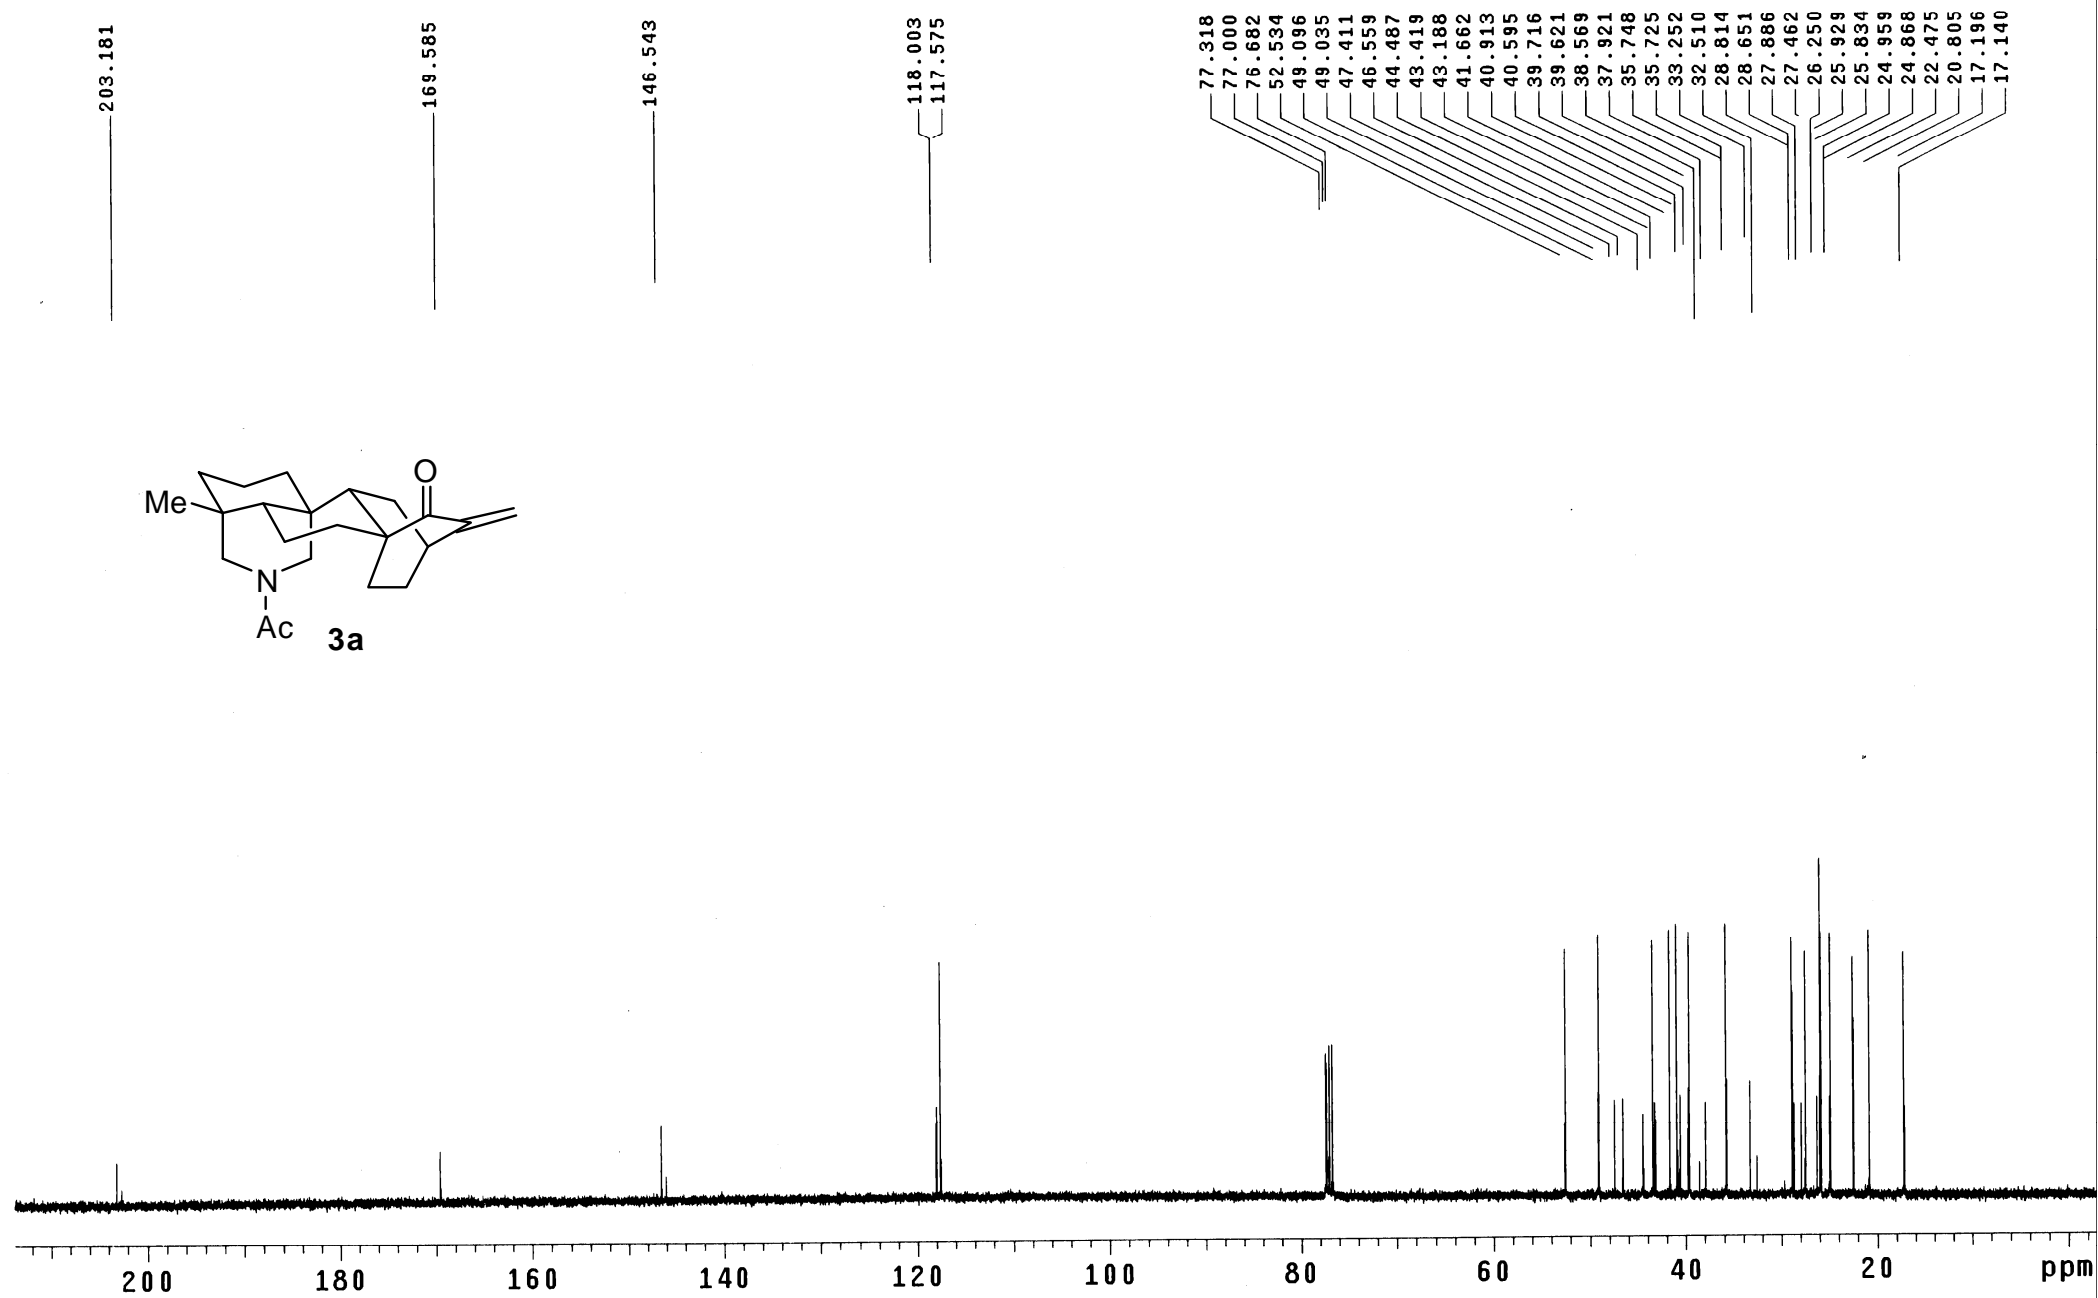



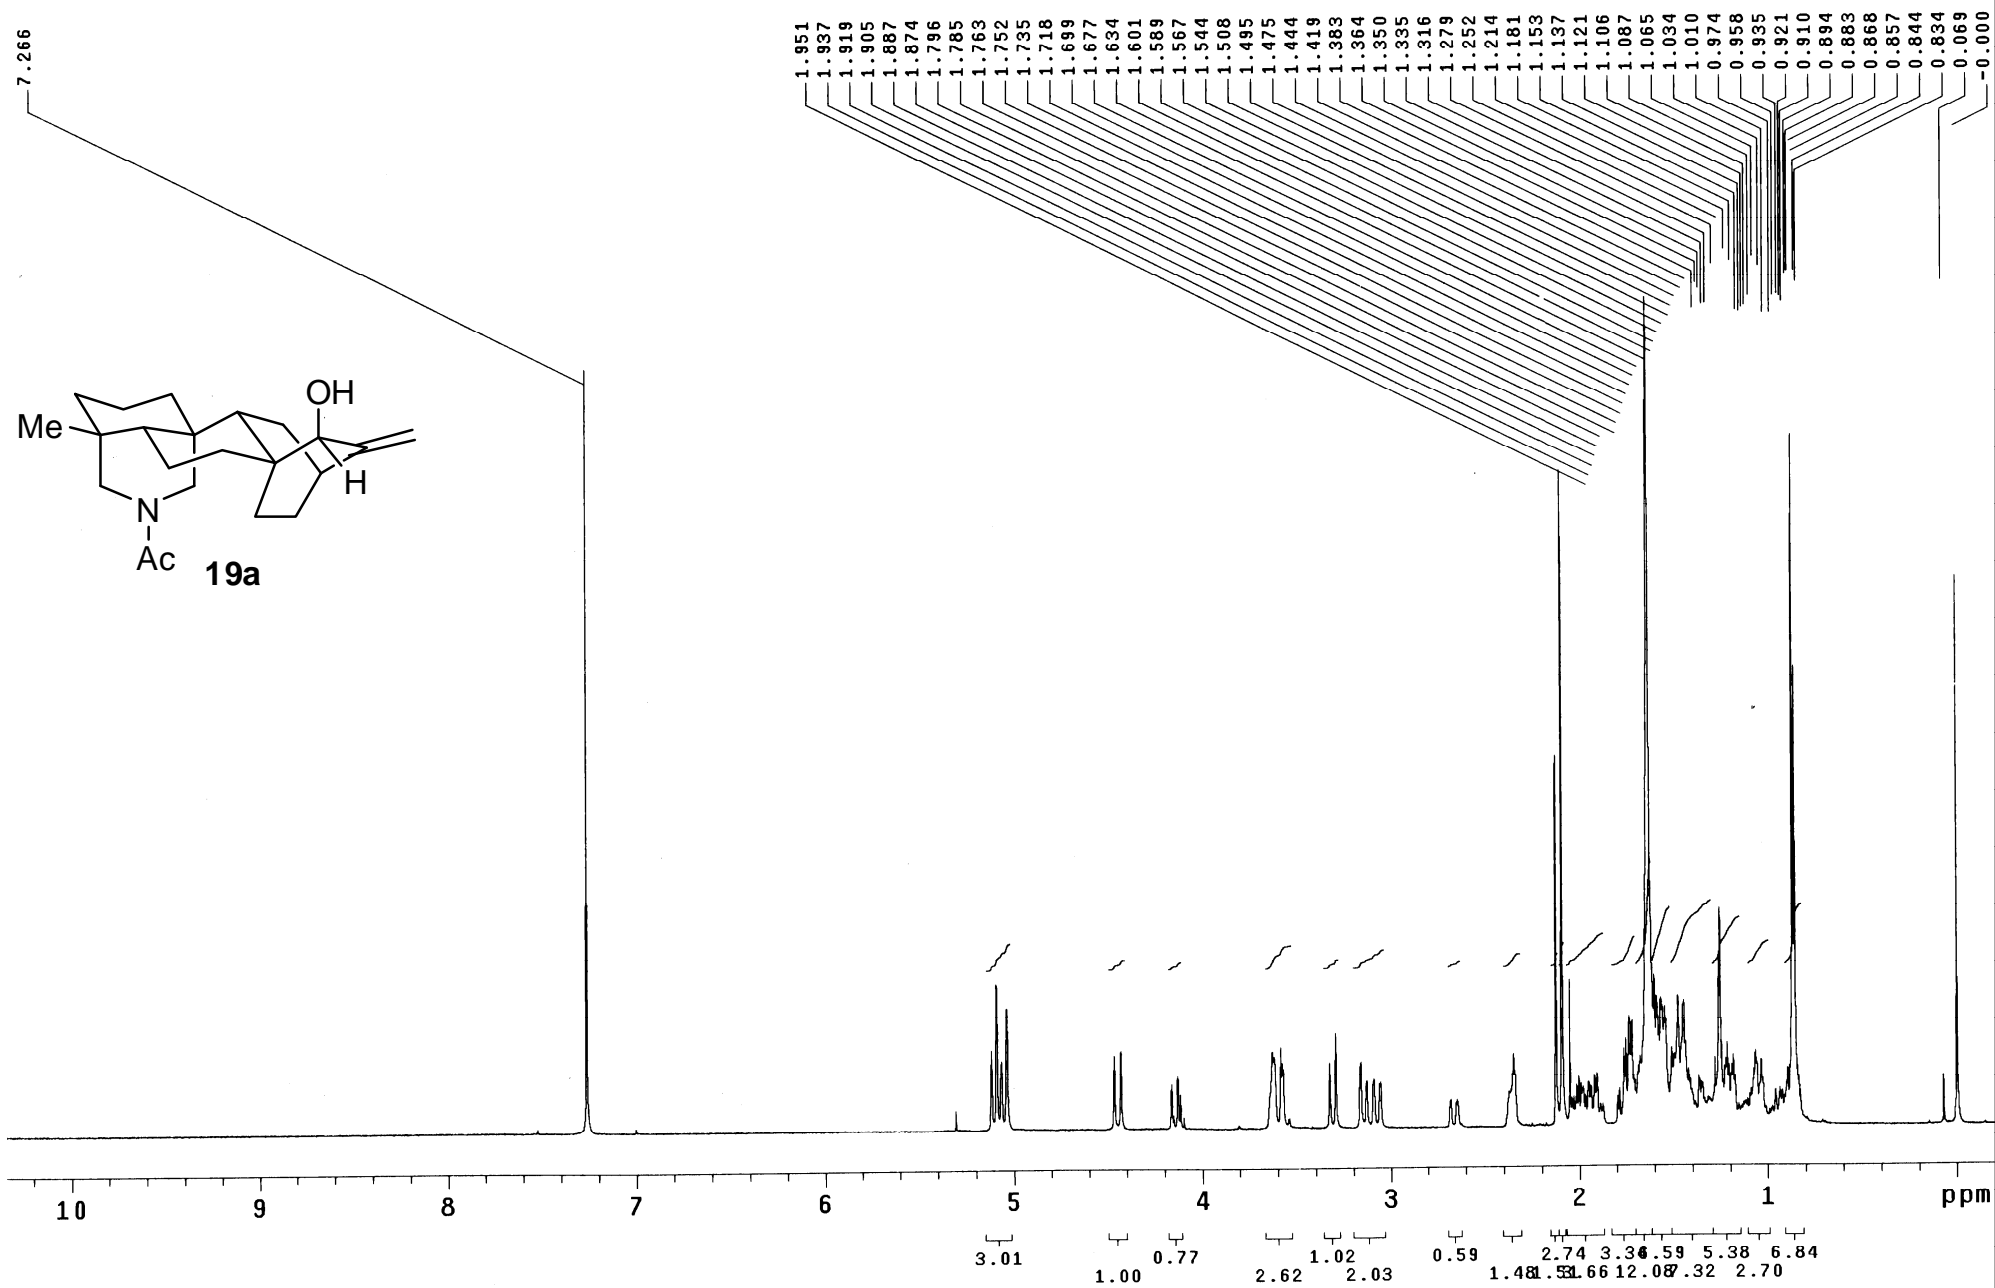

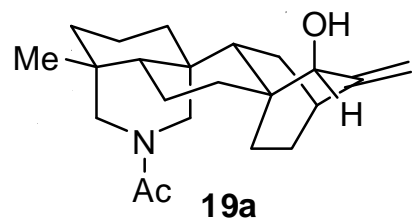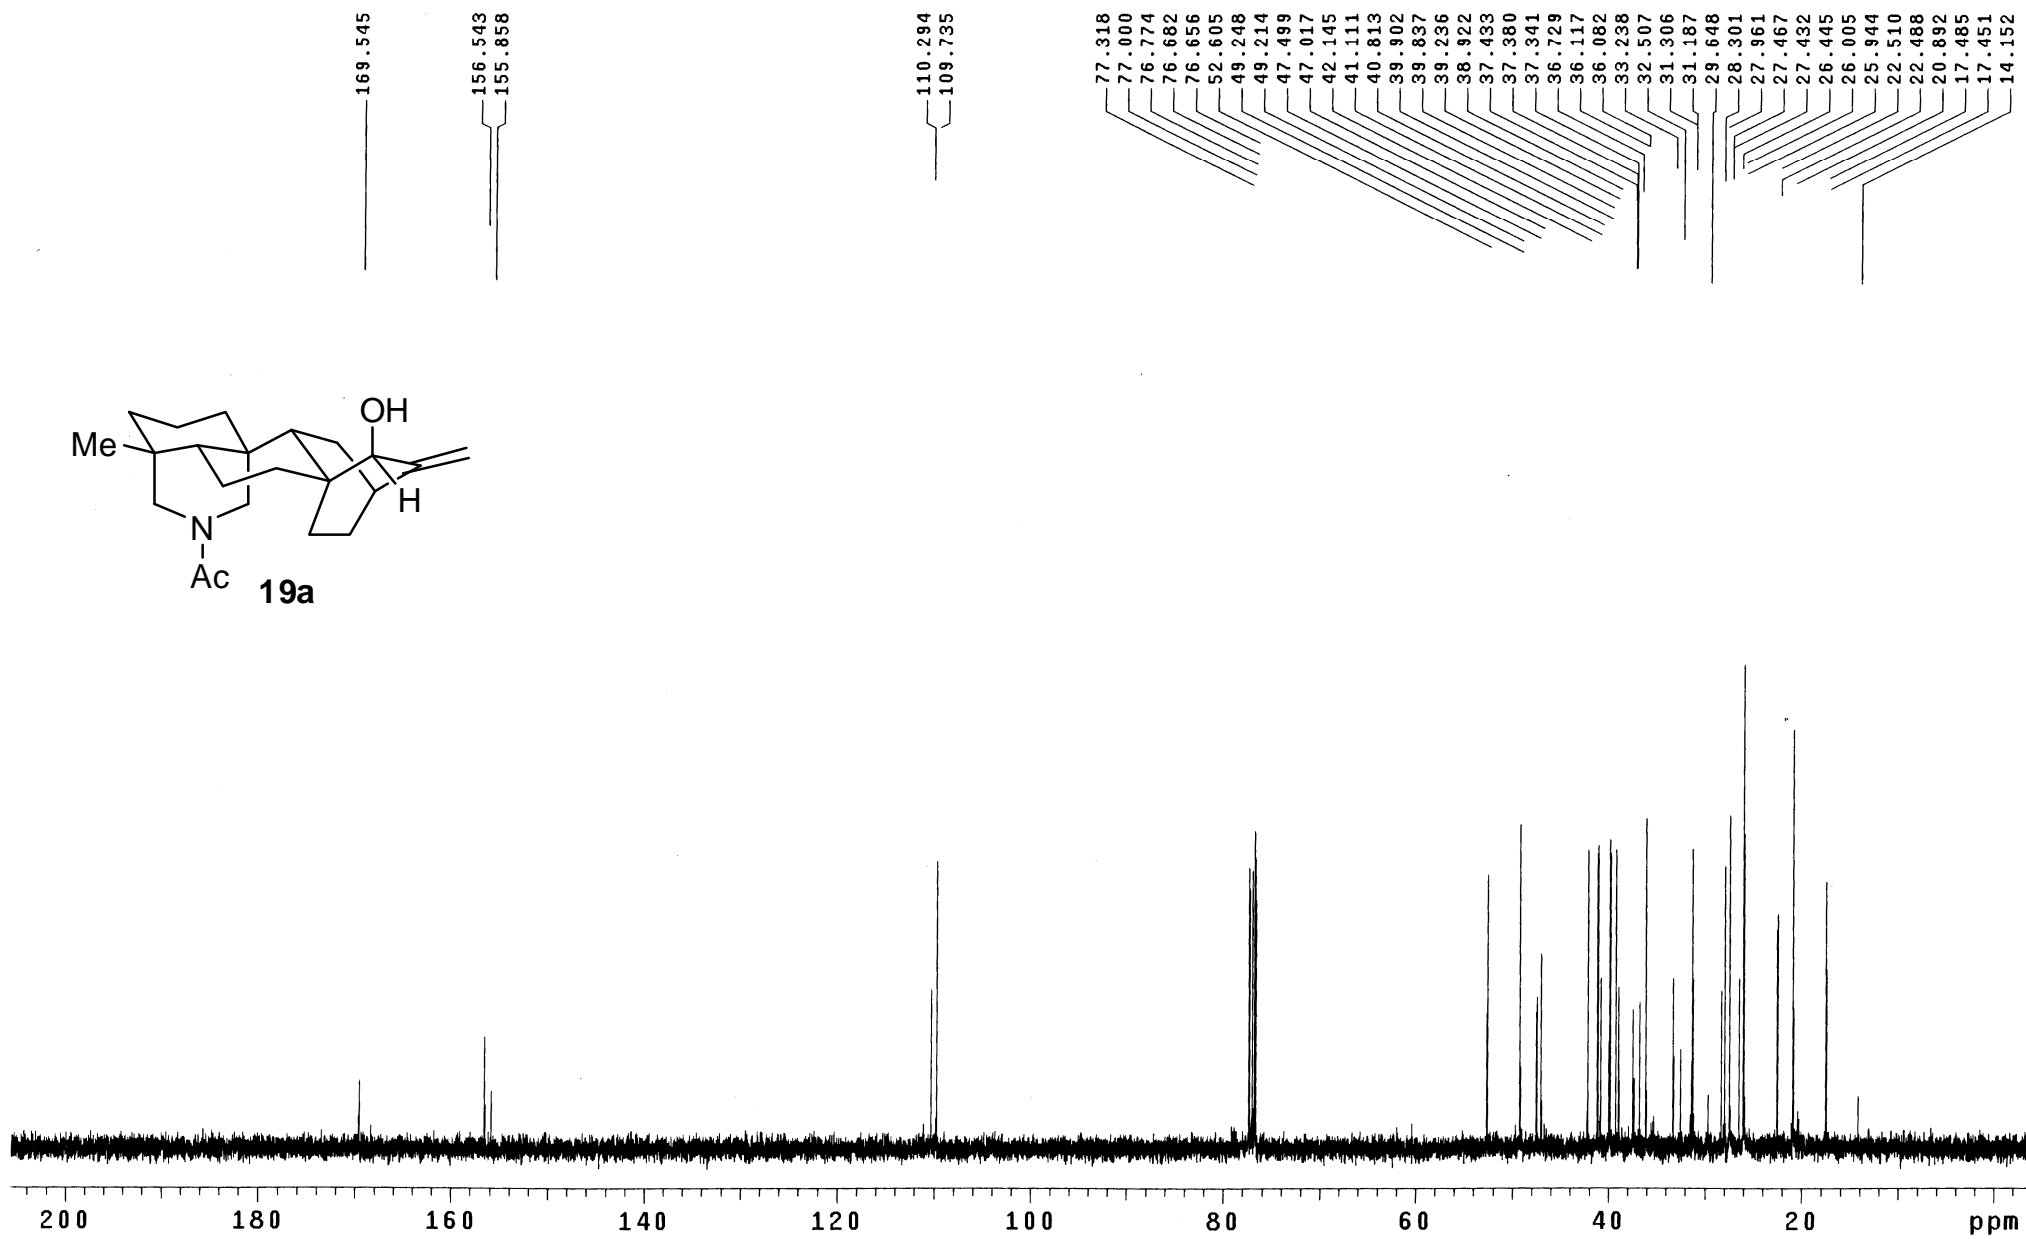

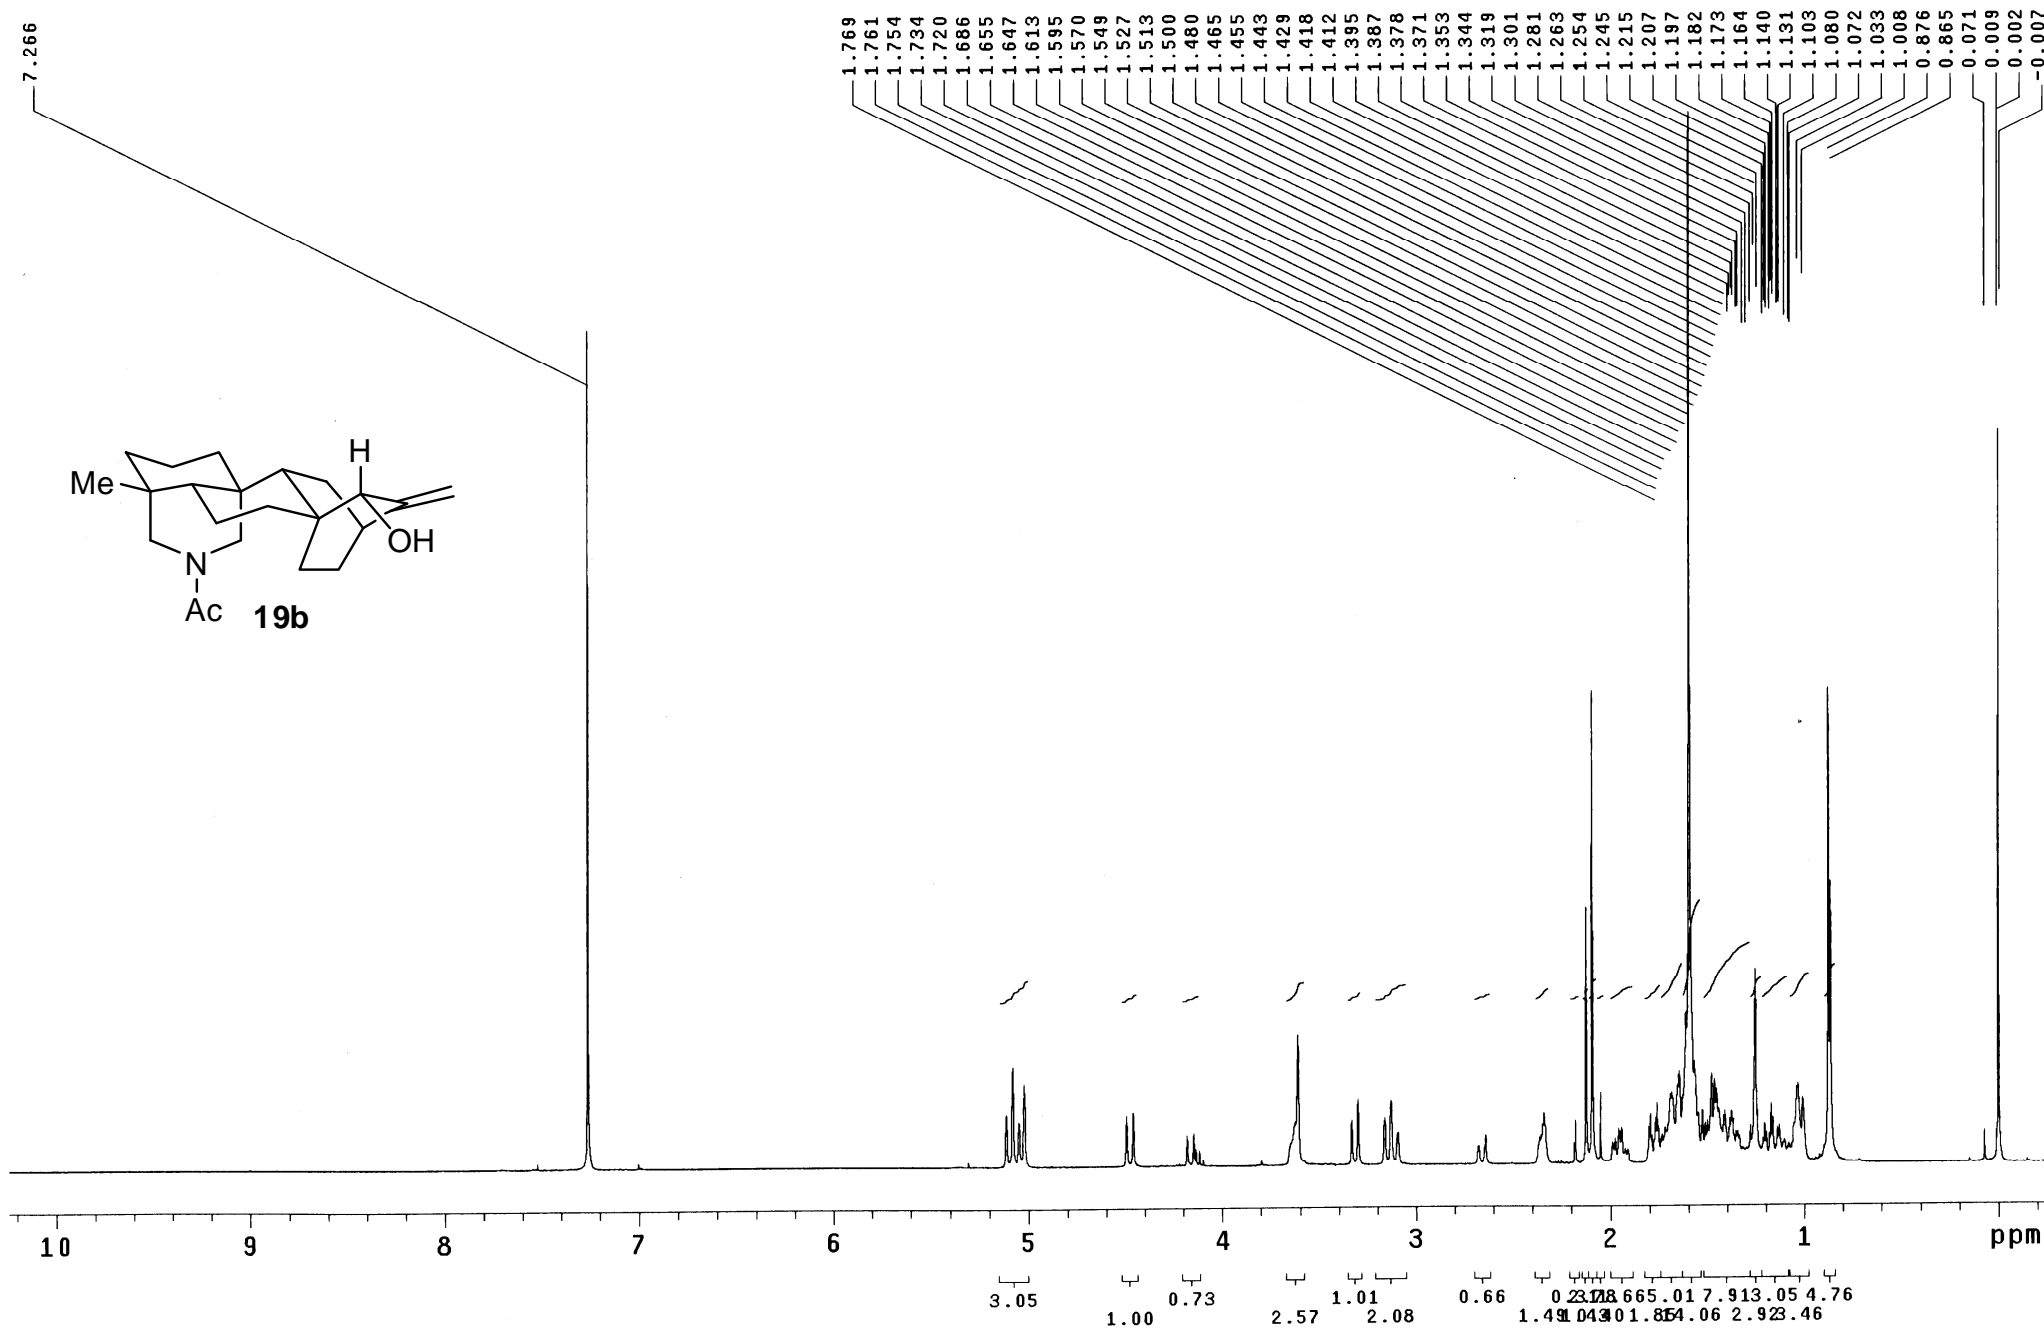

S35

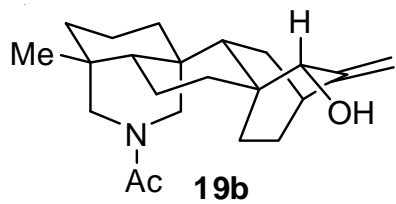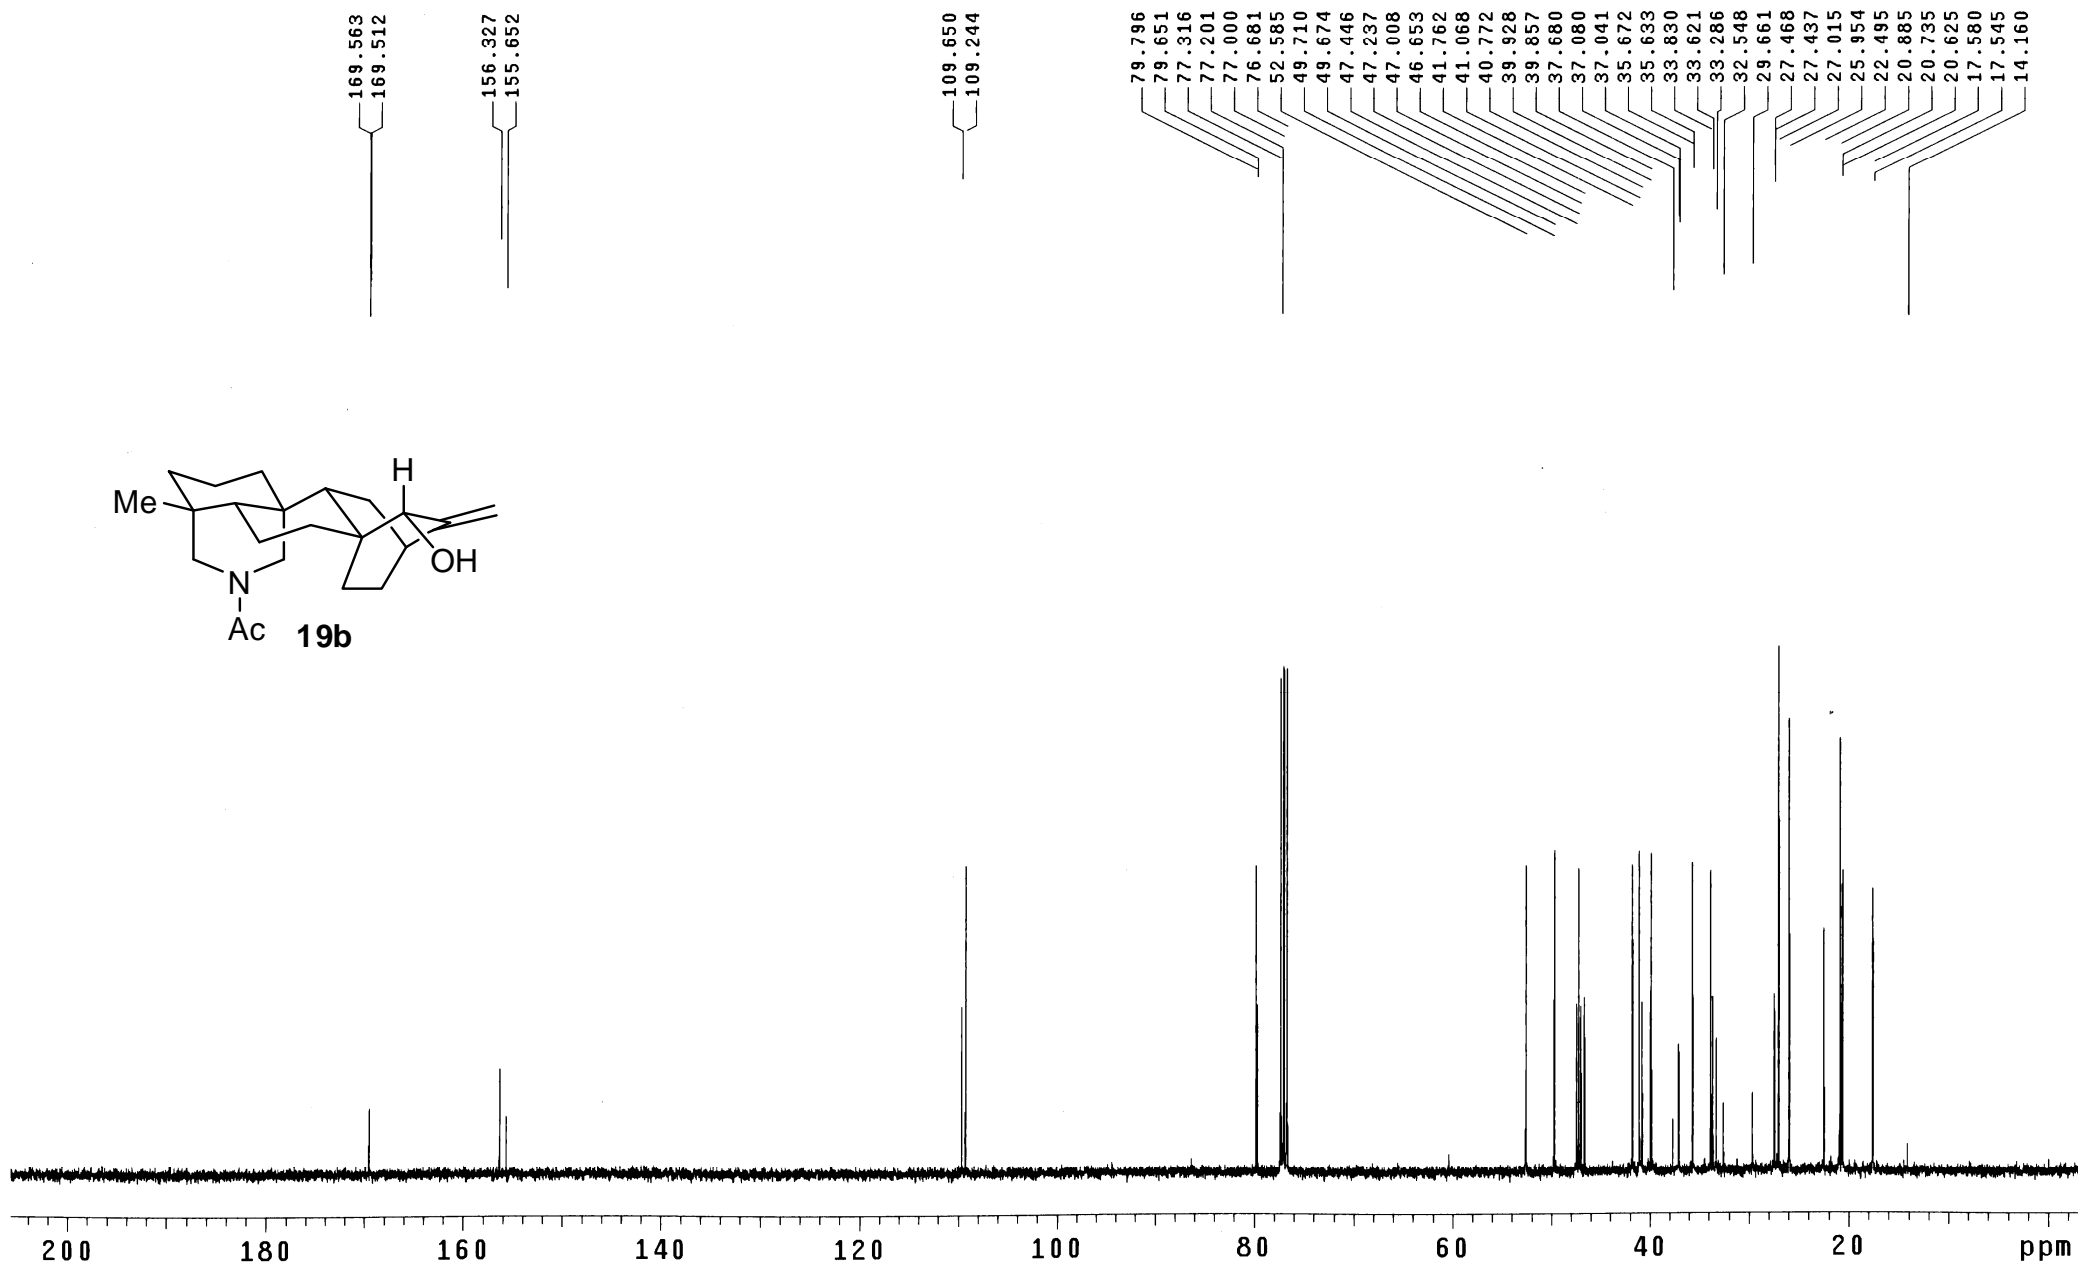

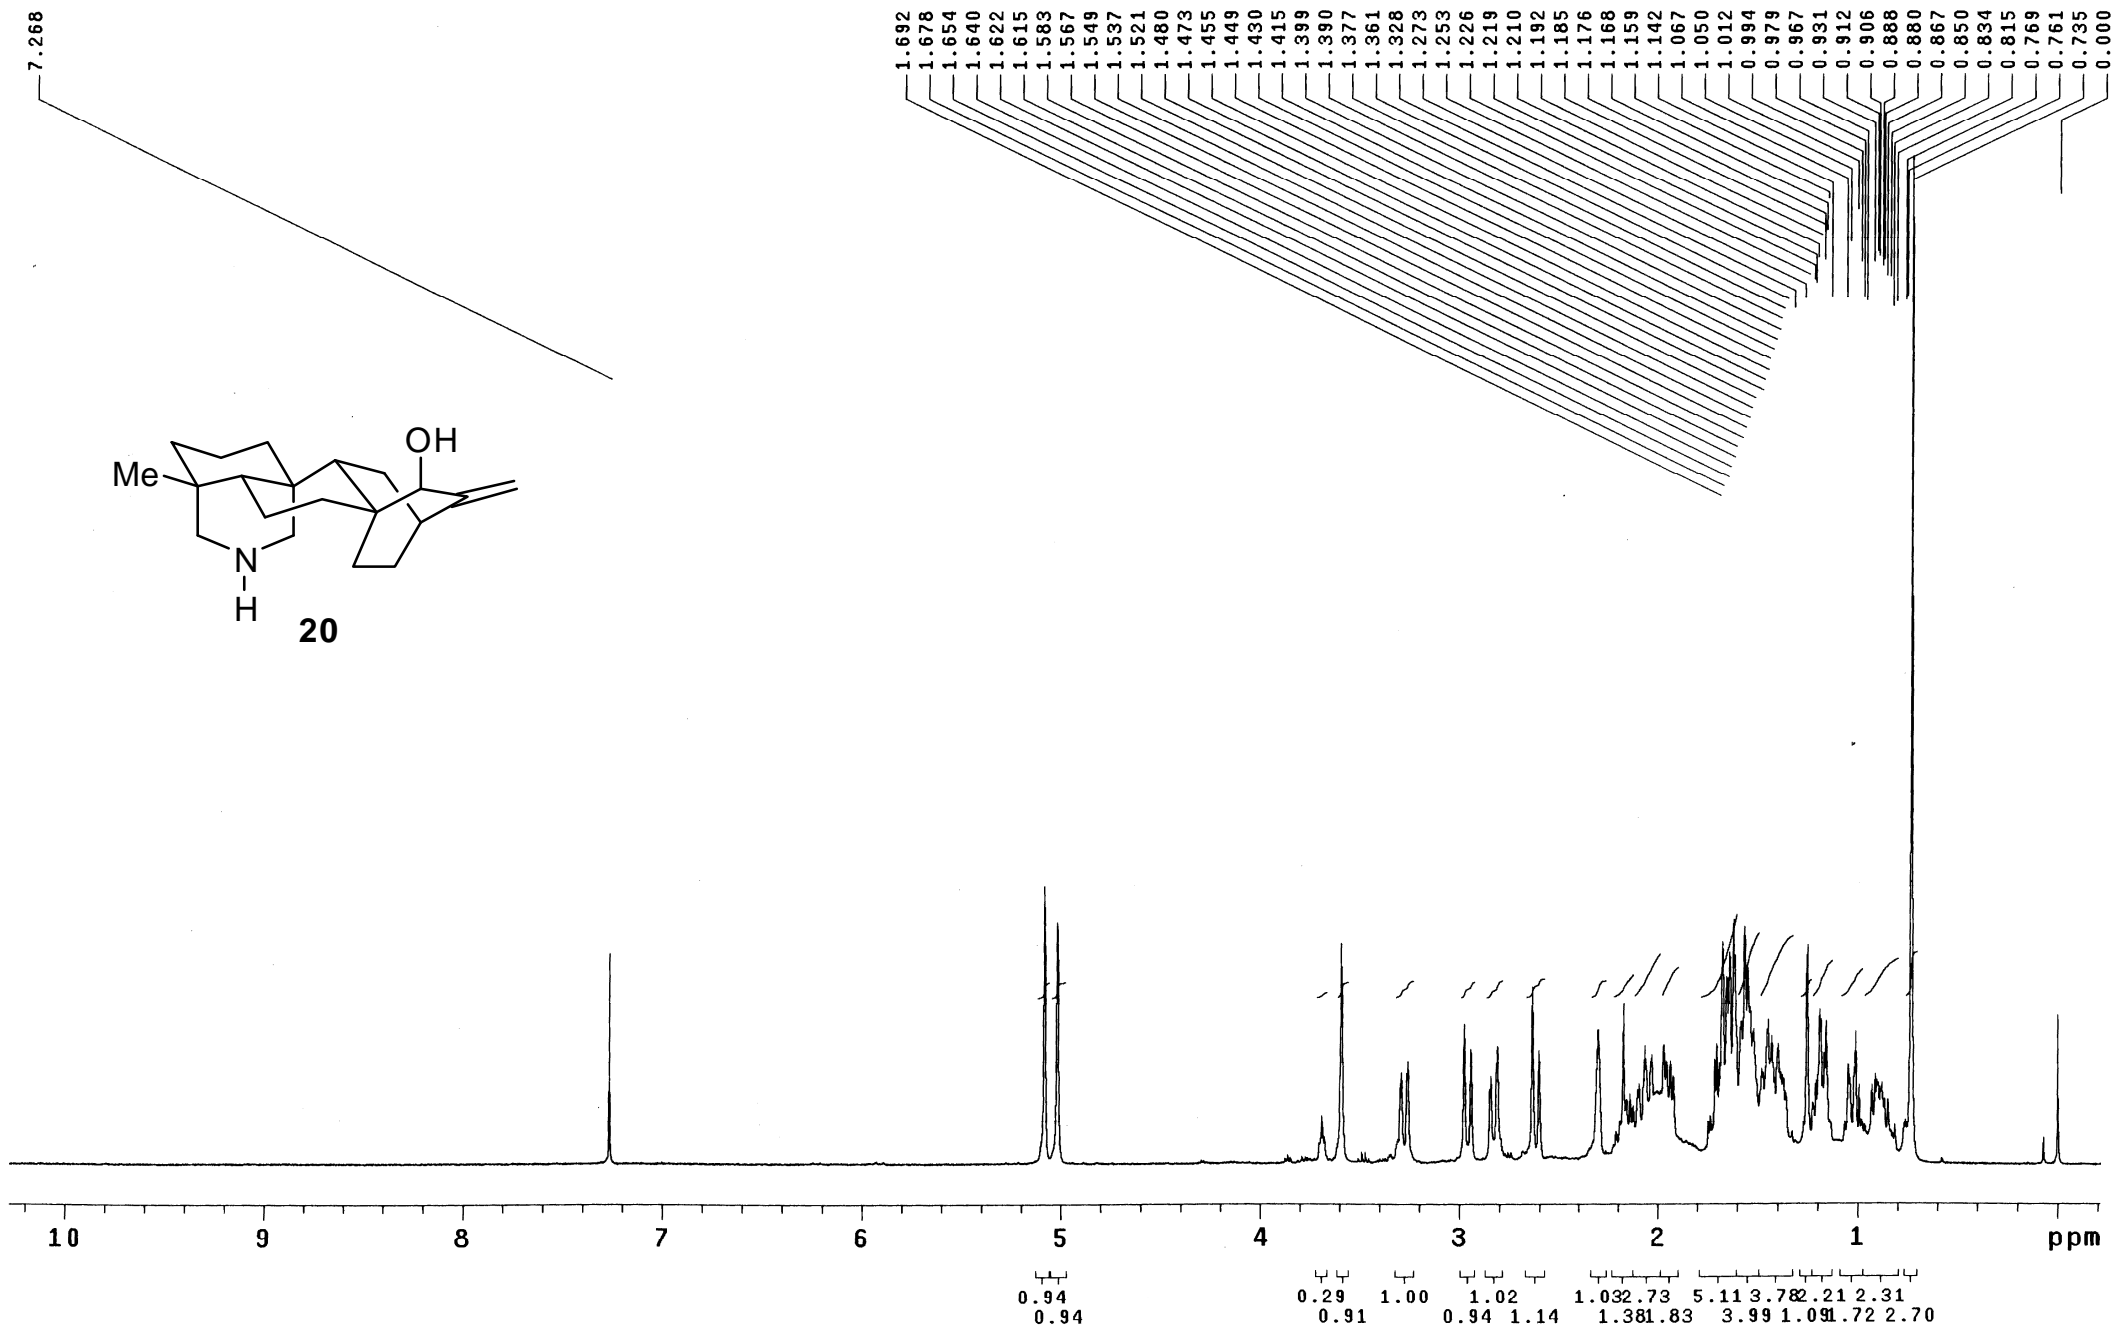

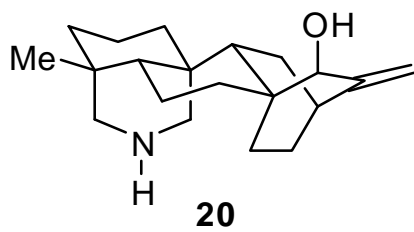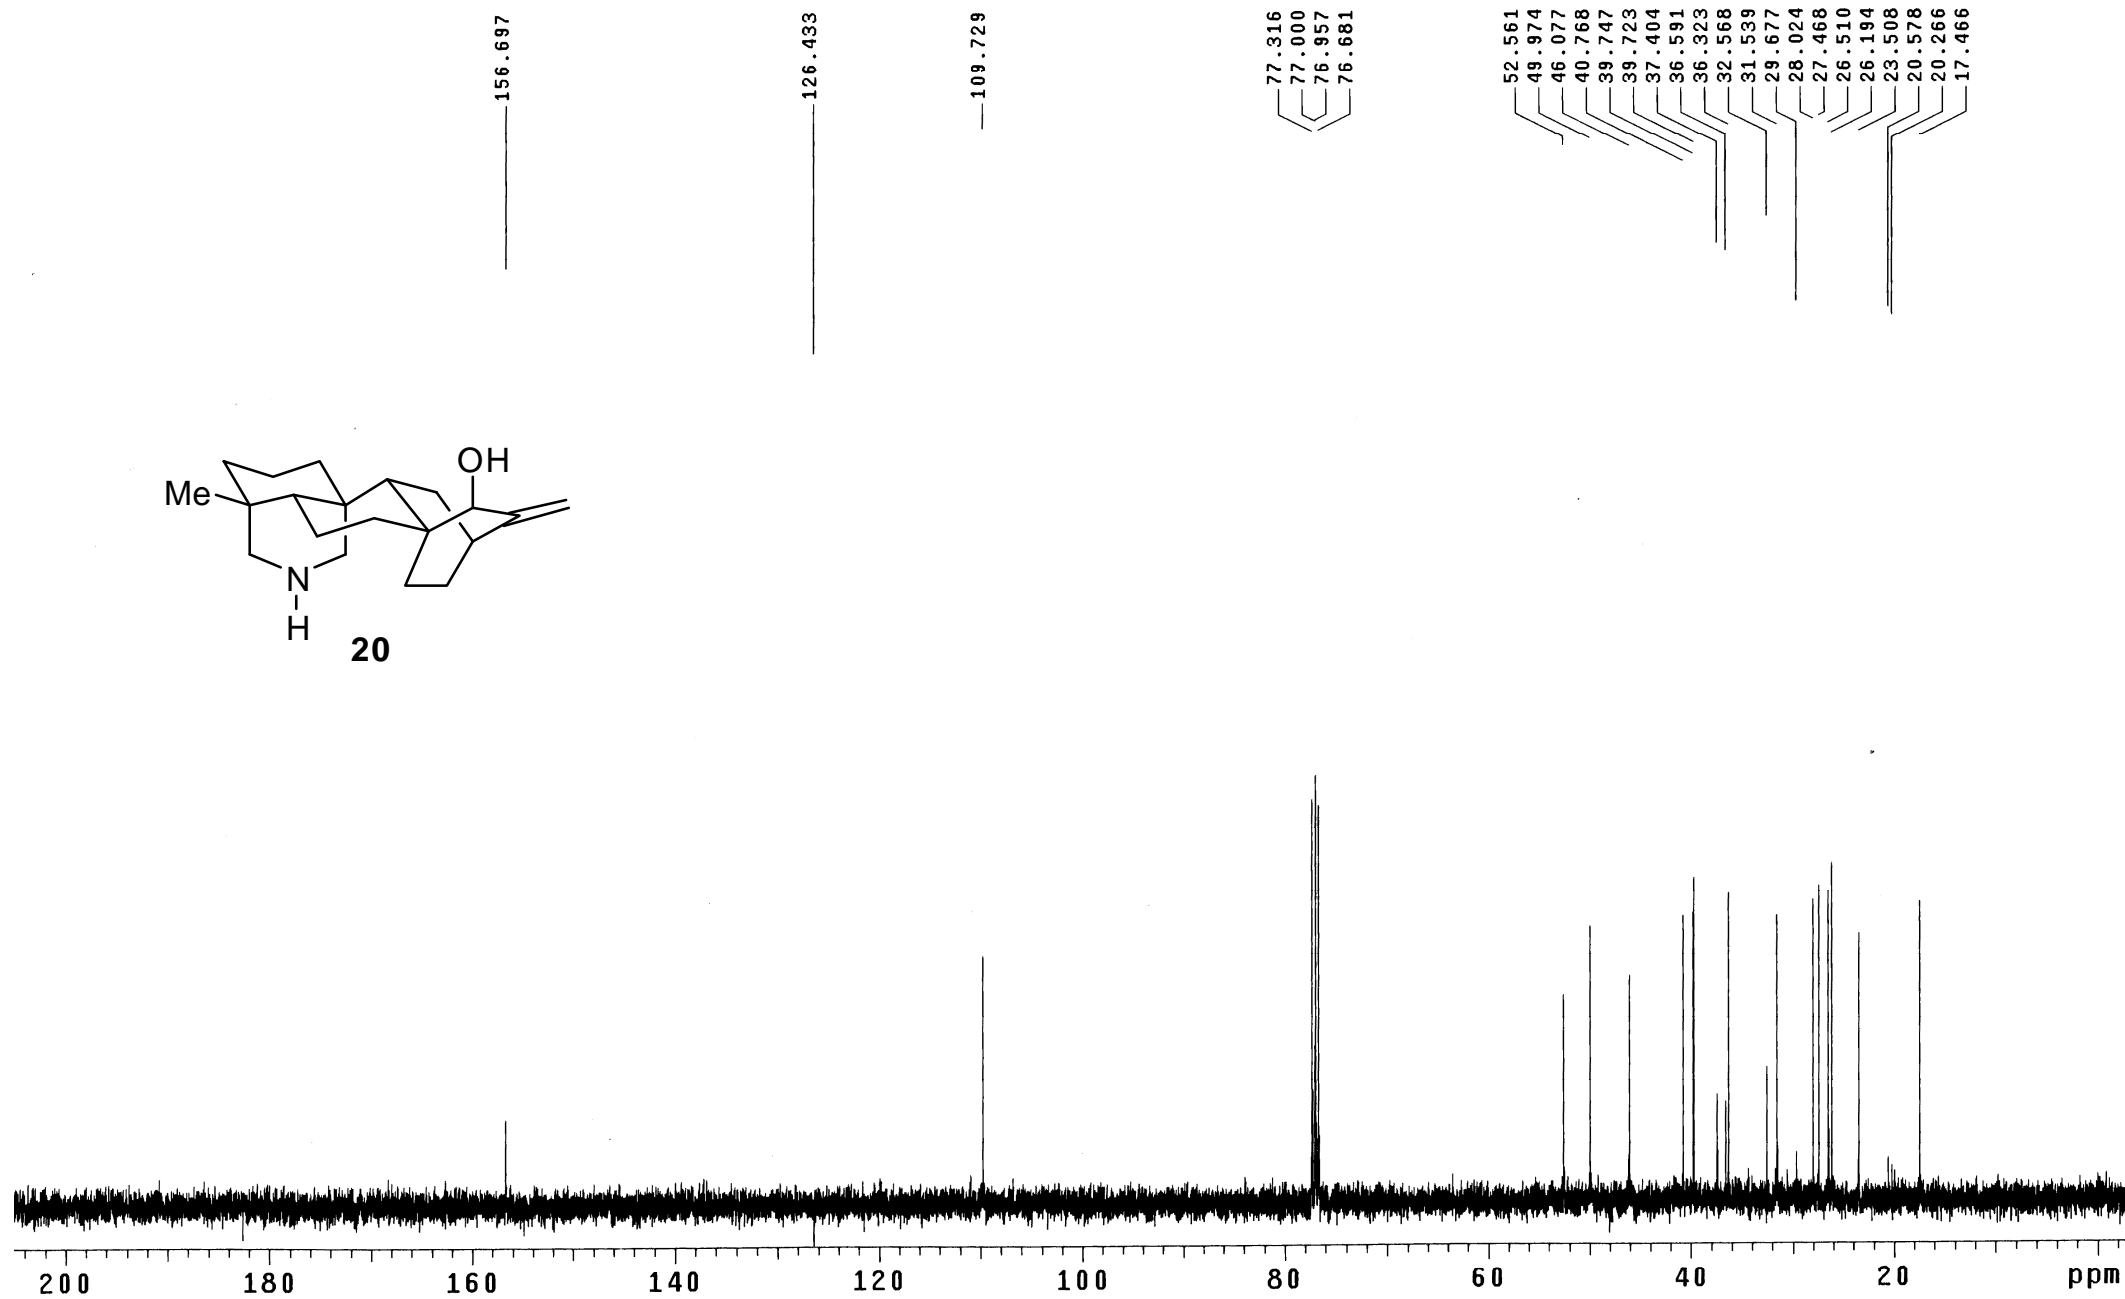

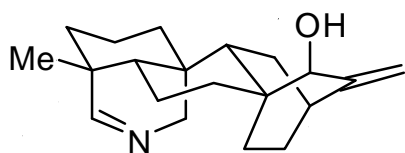

(±)-Isoazitine (2)

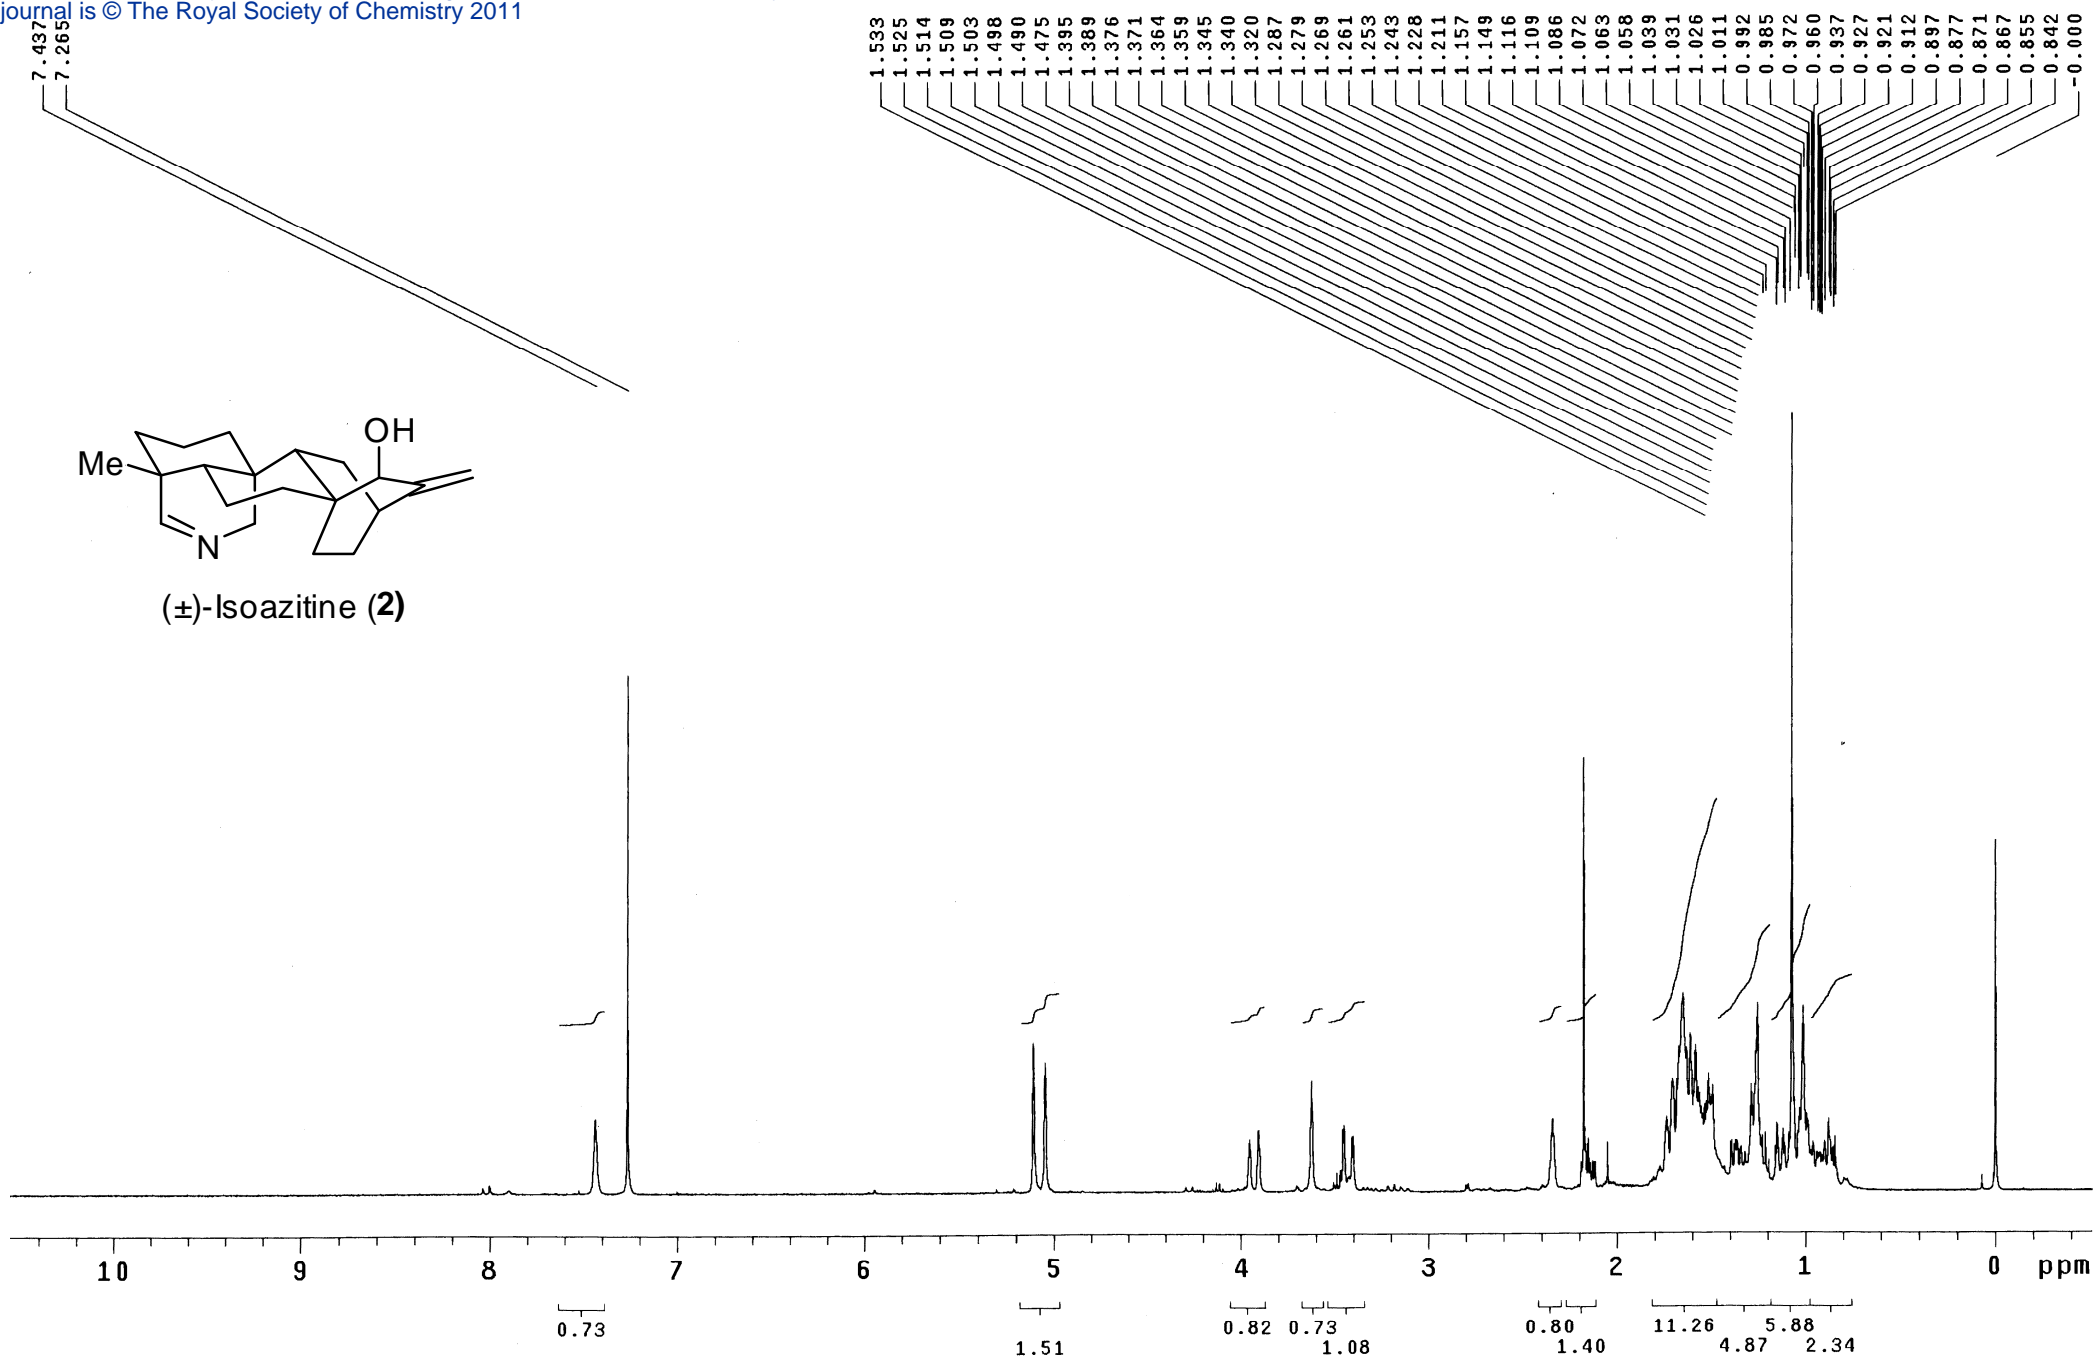

### Synthetic Isozitrine

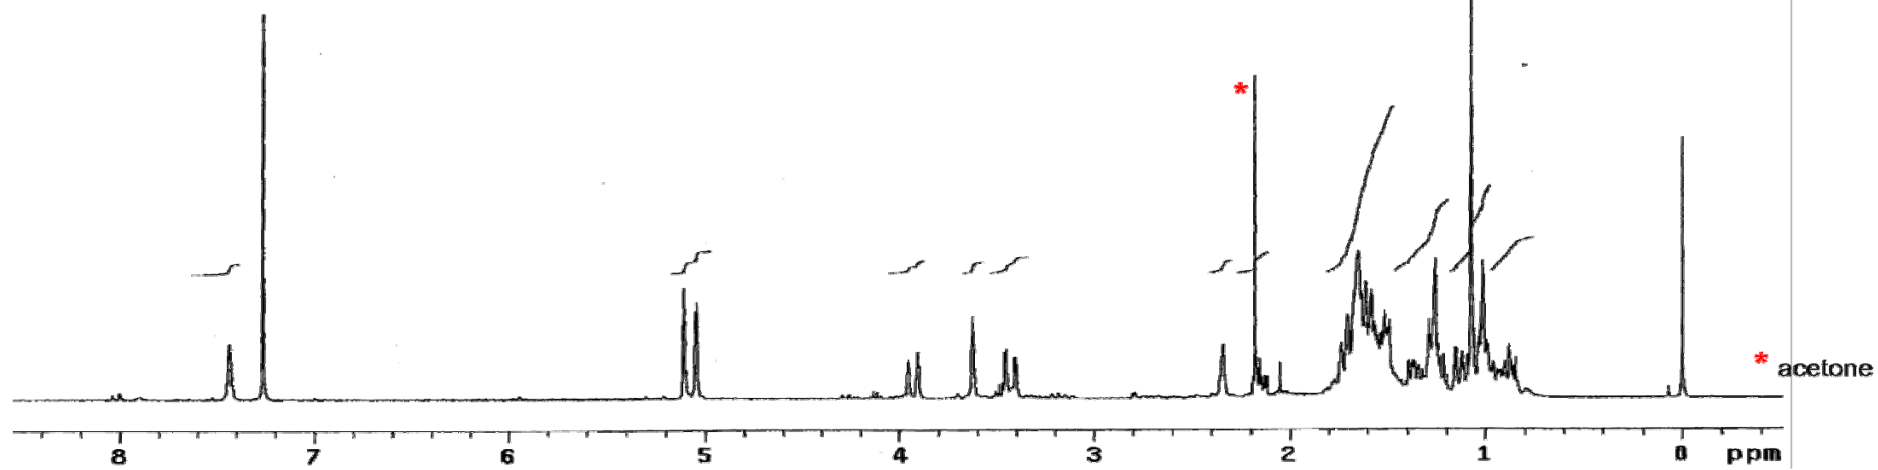

### Natural Isozitrine

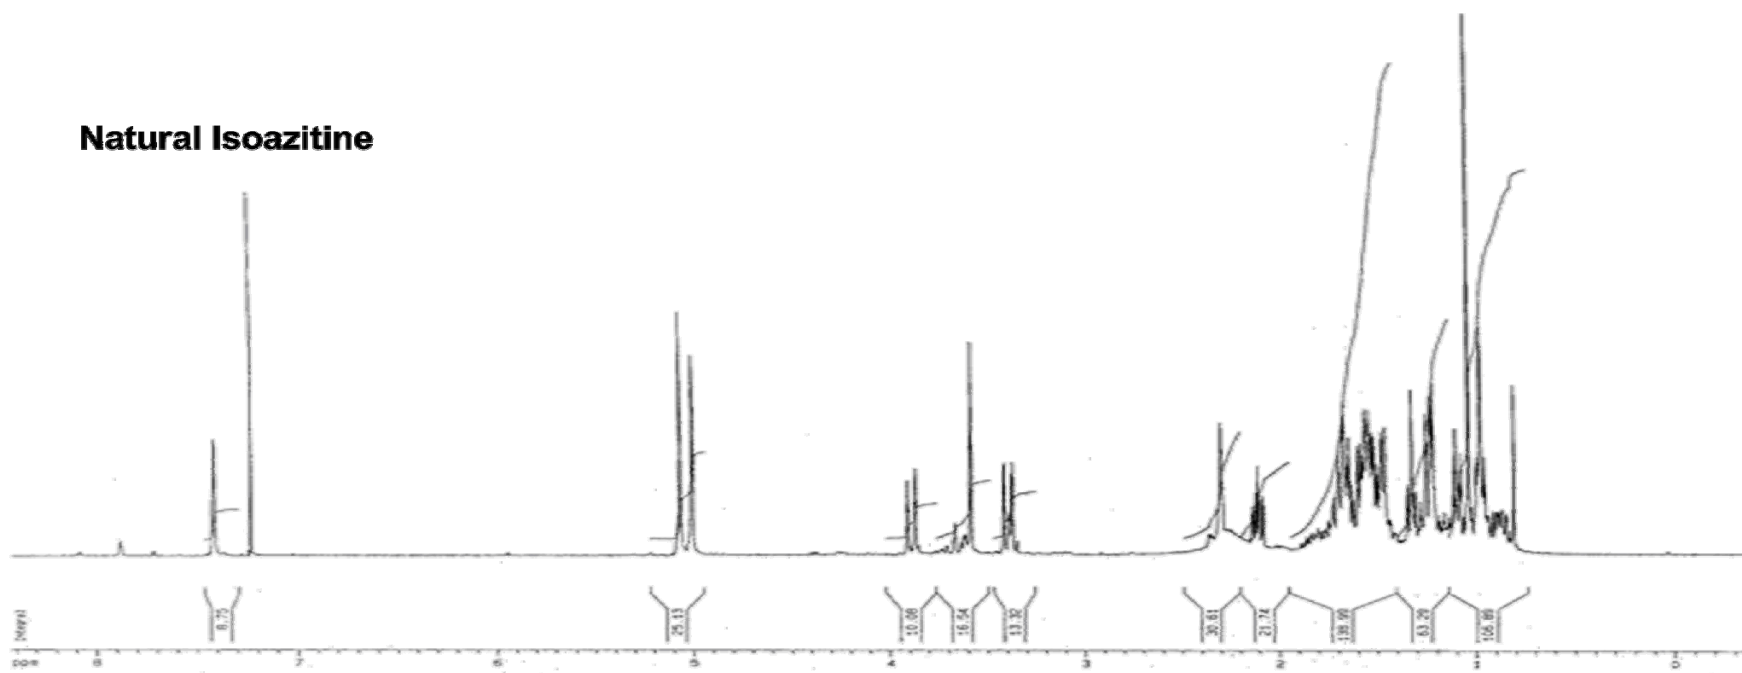



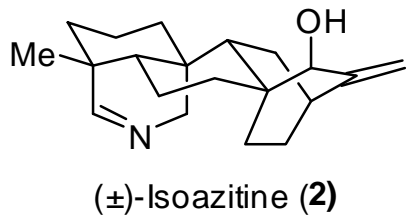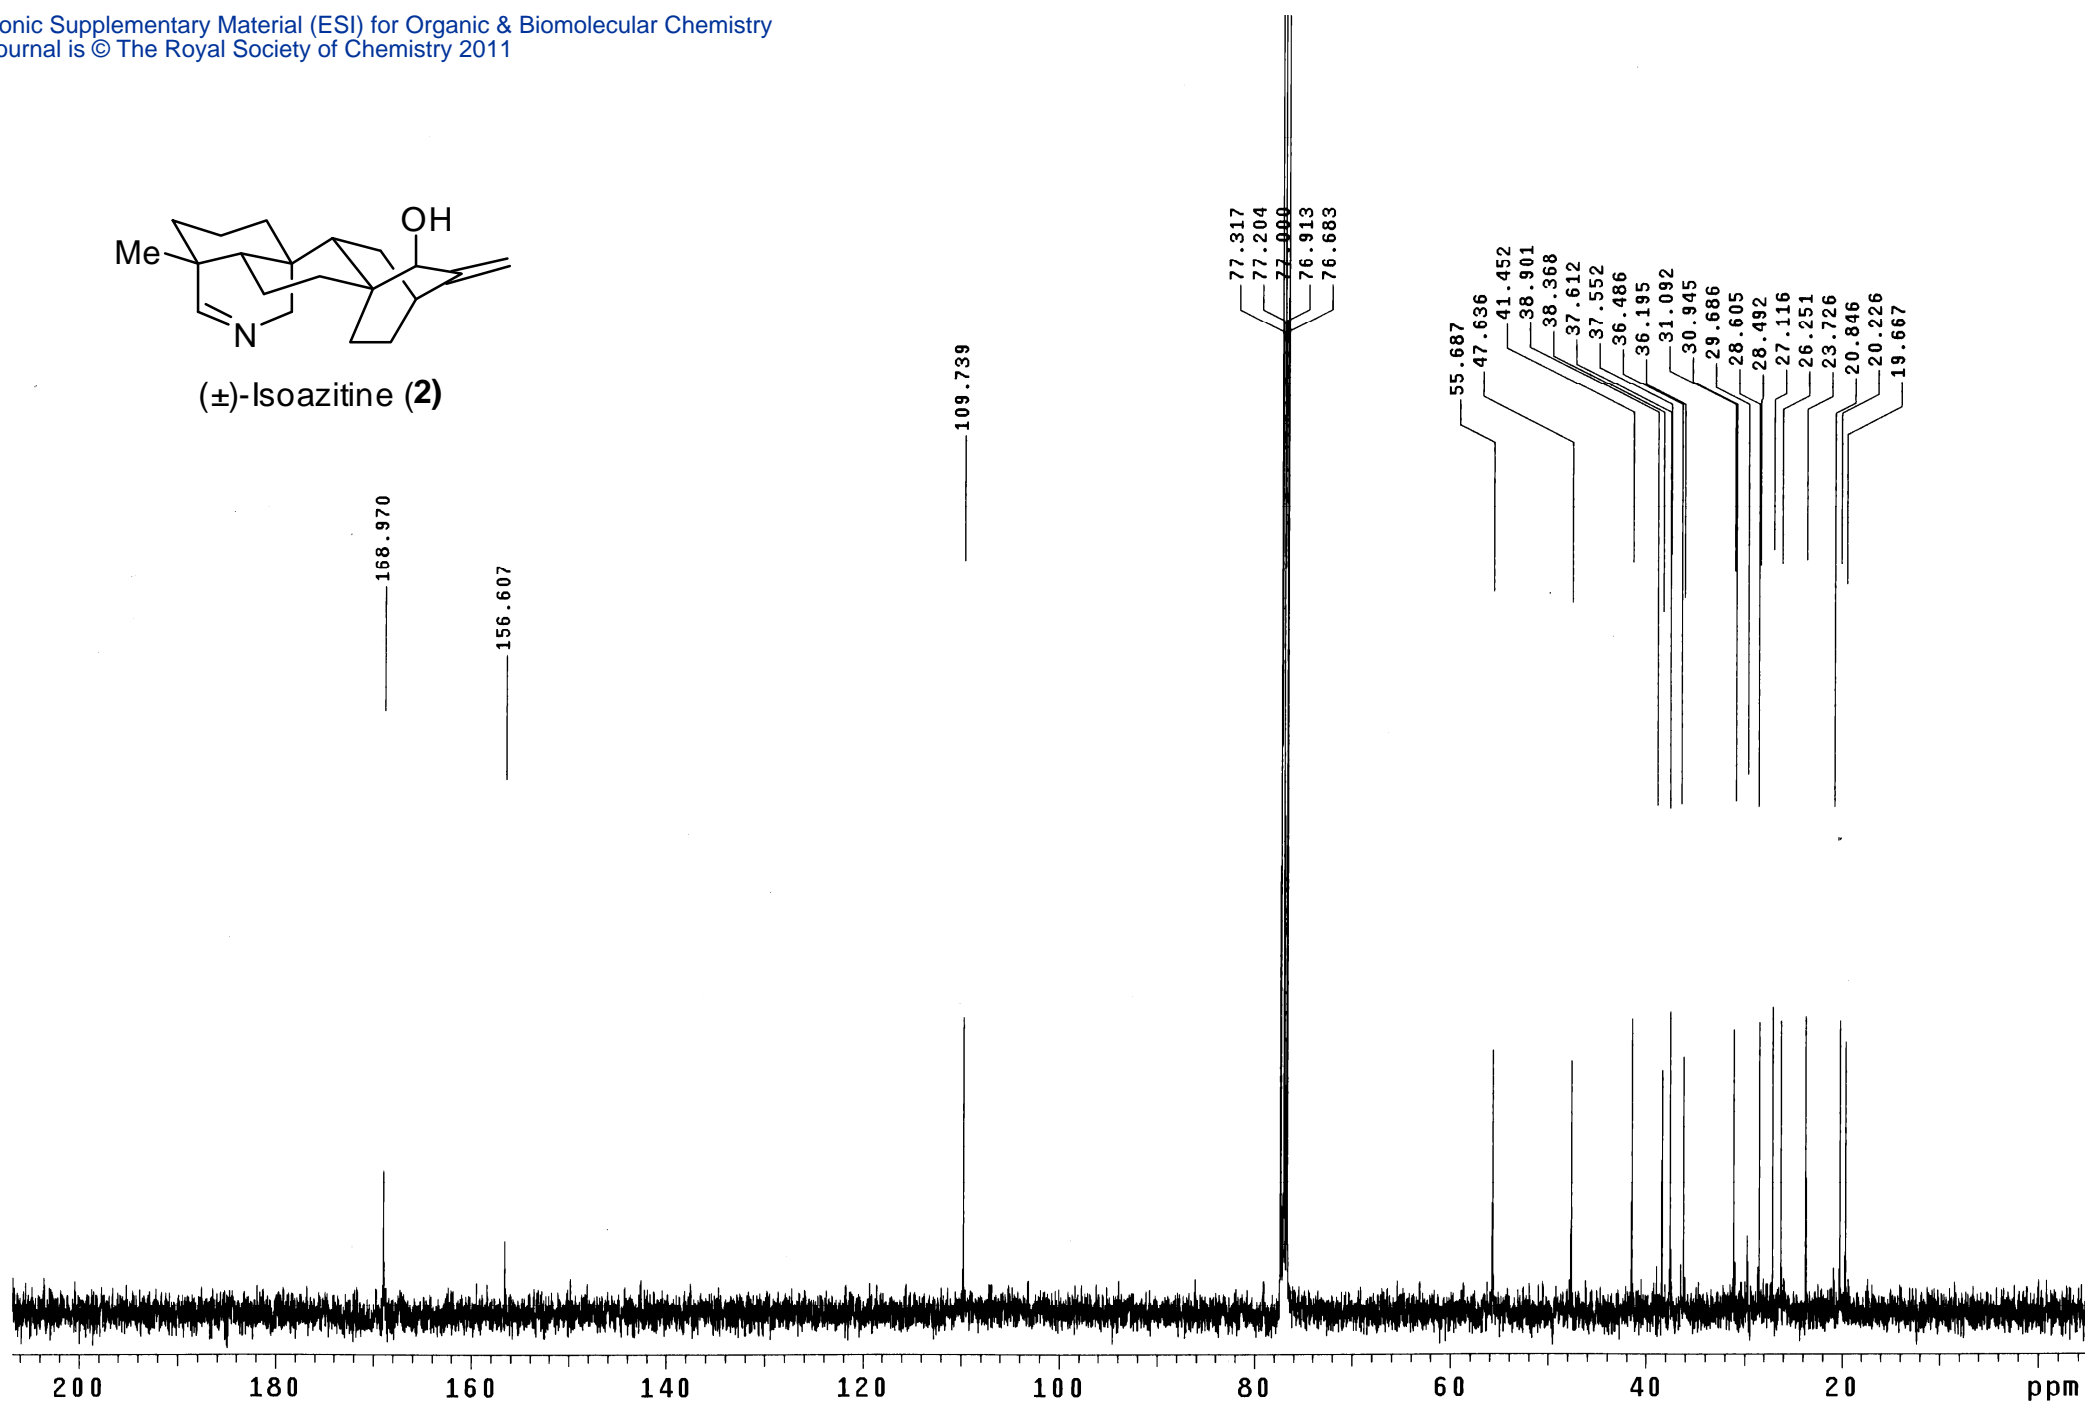

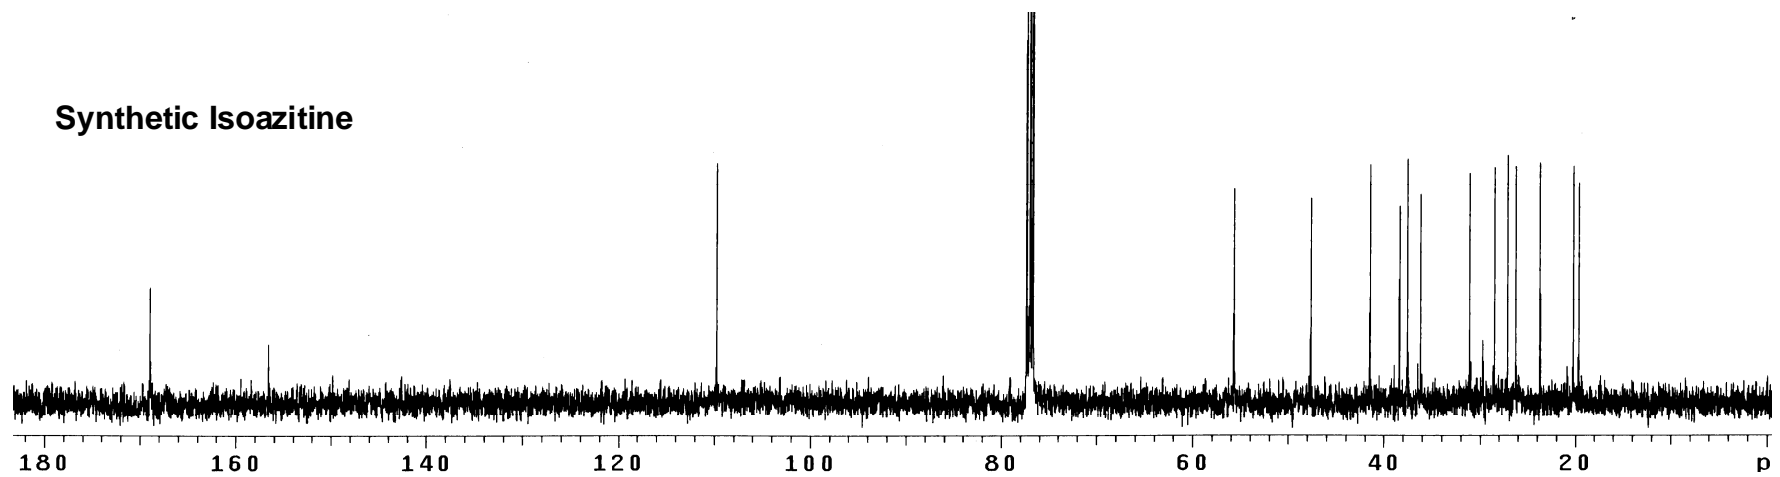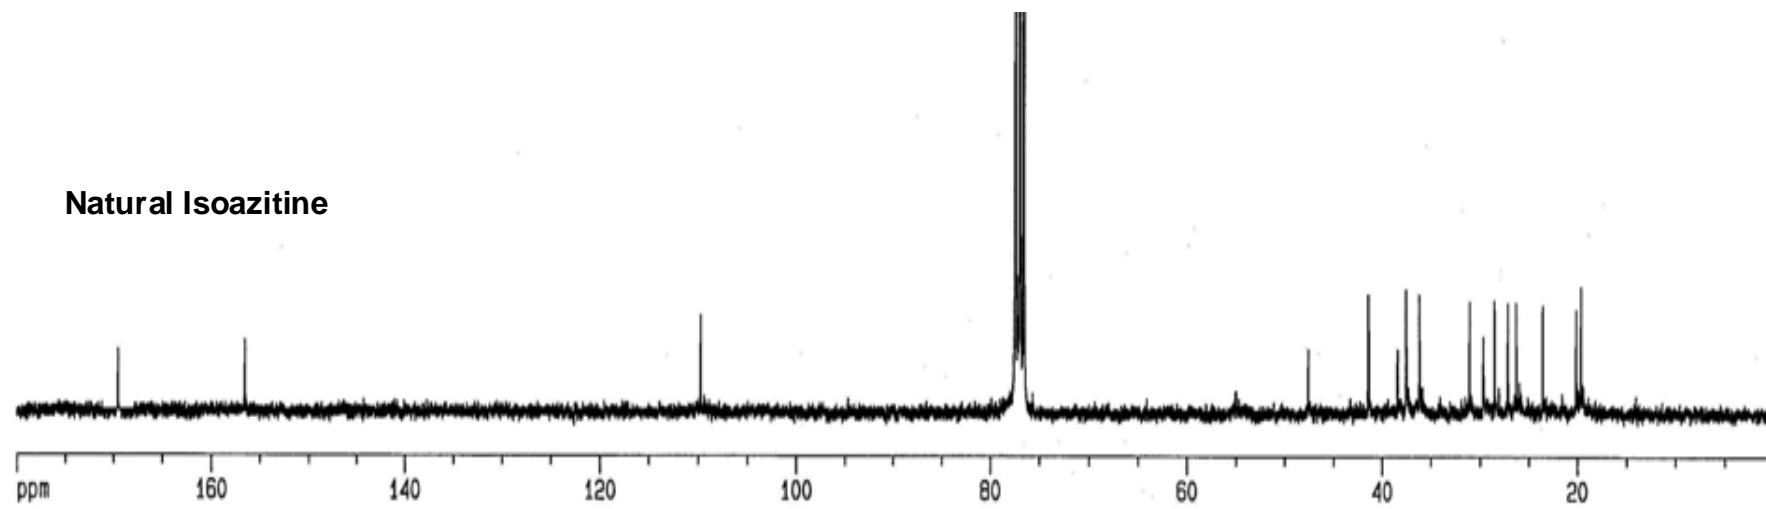

Supplement: c1ob06704d.pdf [file c1ob06704d.pdf]
